# Supplementary material
Source: publisher figshare collection journal article supplement (https://acs.figshare.com/ndownloader/files/3726097)

*Supporting Information for*

# **Access to Difluoromethylated Arenes by Pd-Catalyzed Reaction of Arylboronic Acids with Bromodifluoroacetate**

**Zhang Feng, Qiao-Qiao Min, and Xingang Zhang\***

*Key Laboratory of Organofluorine Chemistry, Shanghai Institute of Organic Chemistry, Chinese Academy of Sciences,  
345 Lingling Road, Shanghai 200032, China*

[xgzhang@mail.sioc.ac.cn](mailto:xgzhang@mail.sioc.ac.cn)

## List of Contents

|                                                                                                                                                                         |     |
|-------------------------------------------------------------------------------------------------------------------------------------------------------------------------|-----|
| 1) Screening for Pd-Catalyzed Difluoromethylation of Aryl Boronic Acid <b>1a</b> with Bromodifluoroacetate <b>2</b> (Table S1-S8).....                                  | S3  |
| 2) Kinetic Studies of the Reaction of <b>1a</b> with <b>2</b> or <b>V</b> (Scheme S1, Figure S1).....                                                                   | S8  |
| 3) Reaction of Compound <b>4</b> or <b>4'</b> with Hydroquinone under Standard Reaction Conditions (Scheme S2).....                                                     | S10 |
| 4) The Role of Hydroquinone for the Reaction (Scheme S3).....                                                                                                           | S11 |
| 5) The Role of Fe(acac) <sub>3</sub> for the Reaction (Schemes S4-S5, Figures S2-S3).....                                                                               | S11 |
| 6) Identification of Difluorocarbene: Reaction of <b>1a</b> with <b>V</b> under Standard Reaction Conditions in the Presence of Pyridine-2-thiol (Scheme S6).....       | S16 |
| 7) Reaction of <b>1a</b> with <b>V</b> in the Presence of Palladium Complex <b>VI</b> (Scheme S7).....                                                                  | S17 |
| 8) Cross-Coupling Reaction between <b>1a</b> and <b>2</b> in the Presence of Pd(PPh <sub>3</sub> ) <sub>4</sub> with or without Fe(acac) <sub>3</sub> (Scheme S8) ..... | S17 |
| 9) X-Ray Photoelectron Spectroscopy (XPS) Analysis of the Reaction (Scheme S9, Figure S4).....                                                                          | S18 |
| 10) General Procedure for Pd-Catalyzed Difluoromethylation of Aryl Boronic Acids with Bromodifluoroacetate <b>2</b> .....                                               | S20 |
| 11) Data for Compounds <b>3-36</b> .....                                                                                                                                | S20 |
| 12) Data for Compounds <b>37-40</b> .....                                                                                                                               | S33 |
| 13) Copies of <sup>19</sup> F NMR and <sup>13</sup> C NMR spectra of compound <b>V</b> .....                                                                            | S36 |
| 14) Copies of <sup>1</sup> H NMR, <sup>19</sup> F NMR and <sup>13</sup> C NMR spectra of <b>3a</b> .....                                                                | S37 |
| 15) Copies of <sup>1</sup> H NMR, <sup>19</sup> F NMR and <sup>13</sup> C NMR spectra of <b>3-36</b> .....                                                              | S39 |
| 16) Copies of <sup>1</sup> H NMR, <sup>19</sup> F NMR and <sup>13</sup> C NMR spectra of <b>37-40</b> .....                                                             | S85 |

**General information:**  $^1\text{H}$  NMR and  $^{13}\text{C}$  NMR spectra were recorded on a Bruker AM400 and AM500 spectrometer.  $^{19}\text{F}$  NMR was recorded on a Bruker AM400 spectrometer ( $\text{CFCl}_3$  as an external standard and low field is positive). Chemical shifts ( $\delta$ ) are reported in ppm, and coupling constants ( $J$ ) are in Hertz (Hz). The following abbreviations were used to explain the multiplicities: s = singlet, d = doublet, t = triplet, q = quartet, m = multiplet, br = broad. NMR yield was determined by  $^{19}\text{F}$  NMR using fluorobenzene as an internal standard before working up the reaction.

**Materials:** All reagents were used as received from commercial sources, unless specified otherwise. Anhydrous  $\text{K}_2\text{CO}_3$  was purchased from Alfa. DMF, DMSO, and DCE were distilled under reduced pressure from  $\text{CaH}_2$ . 1,4-Dioxane and xylene were distilled from sodium and benzophenone immediately before use.

**Table S1. Pd-Catalyzed Reaction of Arylboronic Acid **1a** with Bromodifluoroacetate **2** in the Presence of Different Oxidants.<sup>a</sup>**

| entry                | oxidant                                      | <b>3/4</b> yield (%) <sup>b</sup> |
|----------------------|----------------------------------------------|-----------------------------------|
| 1                    | $\text{Cu}(\text{OTf})_2$                    | Trace/79                          |
| 2                    | $\text{Cu}(\text{acac})_2$                   | 17/43                             |
| 3                    | $\text{Cu}(\text{OAc})_2$                    | 6/61                              |
| 4                    | $\text{Co}(\text{acac})_3$                   | 32/12                             |
| 5                    | $\text{Fe}(\text{acac})_3$                   | 39/43                             |
| <b>6<sup>c</sup></b> | <b><math>\text{Fe}(\text{acac})_3</math></b> | <b>48/46</b>                      |

<sup>a</sup>Reaction conditions (unless otherwise specified): **1a** (0.3 mmol, 1.0 equiv), **2** (2.0 equiv),  $\text{K}_2\text{CO}_3$  (4.0 equiv), dioxane (2 mL), 80 °C, 24 h. <sup>b</sup>Determined by  $^{19}\text{F}$  NMR using fluorobenzene as an internal standard. <sup>c</sup> $\text{Fe}(\text{acac})_3$  (3.5 mol %).

**Table S2. Screening of Palladium Sources.<sup>a</sup>**

| entry    | [Pd](mol %)                                               | ligand (y) | 3/4 yield (%) <sup>b</sup> |
|----------|-----------------------------------------------------------|------------|----------------------------|
| 1        | Pd(PPh <sub>3</sub> ) <sub>4</sub> (5)                    | 10         | 48/46                      |
| 2        | Pd <sub>2</sub> (dba) <sub>3</sub> (2.5)                  | 10         | 20/ trace                  |
| 3        | Pd(OAc) <sub>2</sub> (5)                                  | 10         | 38/trace                   |
| 4        | PdCl <sub>2</sub> (5)                                     | 10         | 30/4                       |
| <b>5</b> | <b>PdCl<sub>2</sub>(PPh<sub>3</sub>)<sub>2</sub> (5)</b>  | <b>10</b>  | <b>58/13</b>               |
| 6        | PdCl <sub>2</sub> (dppf) (5)                              | 10         | 18/12                      |
| 7        | PdCl <sub>2</sub> (MeCN) <sub>2</sub> (5)                 | 10         | 55/9                       |
| 8        | [PdCl(C <sub>3</sub> H <sub>5</sub> )] <sub>2</sub> (2.5) | 10         | 35/5                       |
| <b>9</b> | <b>PdCl<sub>2</sub>(PhCN)<sub>2</sub> (5)</b>             | <b>10</b>  | <b>62/3</b>                |
| 10       | Pd(acac) <sub>2</sub> (5)                                 | 10         | 36/1                       |

<sup>a</sup>Reaction conditions (unless otherwise specified): **1a** (0.3 mmol, 1.0 equiv), **2** (2.0 equiv), K<sub>2</sub>CO<sub>3</sub> (4.0 equiv), dioxane (2 mL), 80 °C, 24 h. <sup>b</sup>Determined by <sup>19</sup>F NMR using fluorobenzene as an internal standard.

**Table S3. Screening of Bases.<sup>a</sup>**

| entry | base (equiv)                          | 3a/4a yield (%) <sup>b</sup> |
|-------|---------------------------------------|------------------------------|
| 1     | K <sub>2</sub> CO <sub>3</sub> (4.0)  | 62/3                         |
| 2     | K <sub>3</sub> PO <sub>4</sub> (4.0)  | 16/11                        |
| 3     | KOAc (4.0)                            | Trace/4                      |
| 4     | C <sub>5</sub> OAc (4.0)              | Trace/1                      |
| 5     | NaOAc (4.0)                           | nd/2                         |
| 6     | Na <sub>2</sub> CO <sub>3</sub> (4.0) | nd/17                        |
| 7     | K <sub>2</sub> CO <sub>3</sub> (3.5)  | 50/6                         |
| 8     | K <sub>2</sub> CO <sub>3</sub> (3.0)  | 49/7                         |
| 9     | K <sub>2</sub> CO <sub>3</sub> (2.5)  | 46/10                        |
| 12    | K <sub>2</sub> CO <sub>3</sub> (2.0)  | 10/23                        |
| 13    | K <sub>2</sub> CO <sub>3</sub> (1.5)  | Trace/3                      |

<sup>a</sup>Reaction conditions (unless otherwise specified): **1a** (0.3 mmol, 1.0 equiv), **2** (2.0 equiv), dioxane (2 mL), 80 °C, 24 h. <sup>b</sup>Determined by <sup>19</sup>F NMR using fluorobenzene as an internal standard.



**Table S4. Screening of Ligands.<sup>a</sup>**

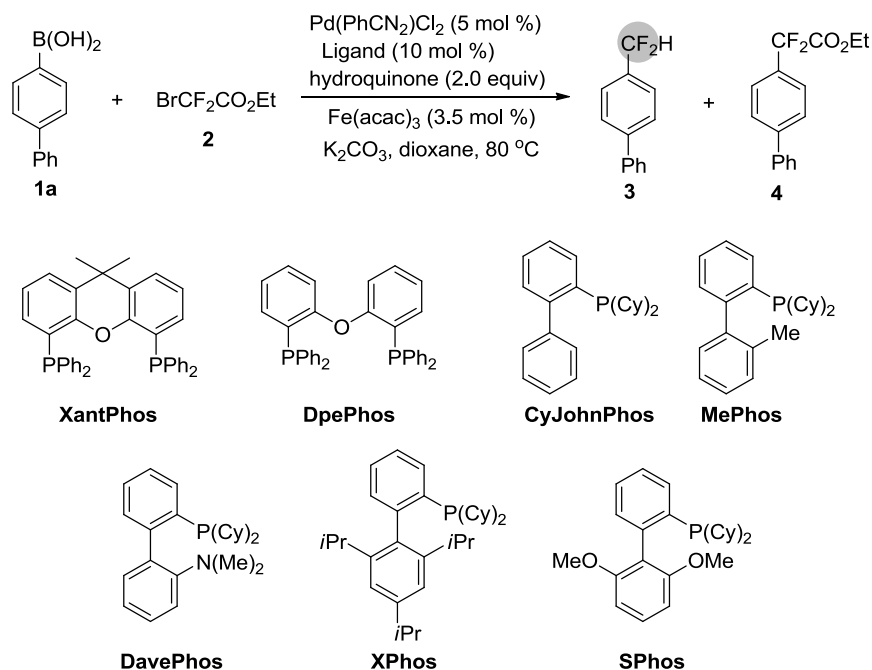

| entry           | ligand          | <b>3a/4a</b> yield (%) <sup>b</sup> |
|-----------------|-----------------|-------------------------------------|
| 1               | Xantphos        | 62/3                                |
| 2               | DpePhos         | 32/nd                               |
| 3               | dppe            | nd/nd                               |
| 4               | dppp            | nd/nd                               |
| 5               | dppb            | nd/nd                               |
| 6               | dppf            | nd/nd                               |
| 7               | BINAP           | nd/3                                |
| 8               | CyJohnPhos      | trace/trace                         |
| 9               | MePhos          | nd/nd                               |
| 10              | DavePhos        | nd/nd                               |
| 11              | XPhos           | nd/nd                               |
| 12              | SPhos           | nd/nd                               |
| 13 <sup>c</sup> | Xantphos        | 45/2                                |
| 14 <sup>d</sup> | <b>Xantphos</b> | <b>63/2</b>                         |

<sup>a</sup>Reaction conditions (unless otherwise specified): **1a** (0.3 mmol, 1.0 equiv), **2** (2.0 equiv),  $\text{K}_2\text{CO}_3$  (4.0 equiv), dioxane (2 mL), 80 °C, 24 h. <sup>b</sup>Determined by  $^{19}\text{F}$  NMR using fluorobenzene as an internal standard. <sup>c</sup>Xantphos (5 mol %).

<sup>d</sup>Xantphos (7.5 mol %).

**Table S5. Screening of Solvents.<sup>a</sup>**

| entry    | solvent         | <b>3a/4a</b> yield (%) <sup>b</sup> |
|----------|-----------------|-------------------------------------|
| <b>1</b> | <b>dioxane</b>  | <b>63/1</b>                         |
| 2        | DMSO            | nd/nd                               |
| 3        | Dimethoxyethane | 3/nd                                |
| 4        | DMF             | nd/nd                               |
| 5        | Xylene          | nd/40                               |
| 6        | DCE             | trace/nd                            |
| 7        | Diglyme         | 2/nd                                |

<sup>a</sup>Reaction conditions (unless otherwise specified): **1a** (0.3 mmol, 1.0 equiv), **2** (2.0 equiv), K<sub>2</sub>CO<sub>3</sub> (4.0 equiv), solvent (2 mL), 80 °C, 24 h. <sup>b</sup>Determined by <sup>19</sup>F NMR using fluorobenzene as an internal standard.

**Table S6. Screening of Different Amount of Styrene.<sup>a</sup>**

| entry                 | styrene (x) | [Pd]                                                 | <b>3a/4a</b> yield (%) <sup>b</sup> |
|-----------------------|-------------|------------------------------------------------------|-------------------------------------|
| 1                     | 10          | Pd(PhCN) <sub>2</sub> Cl <sub>2</sub>                | 49/3                                |
| 2                     | 20          | Pd(PhCN) <sub>2</sub> Cl <sub>2</sub>                | 61/trace                            |
| 3                     | 40          | Pd(PhCN) <sub>2</sub> Cl <sub>2</sub>                | 61/1                                |
| 4                     | 10          | Pd(PPh <sub>3</sub> ) <sub>4</sub>                   | 60/30                               |
| 5                     | 20          | Pd(PPh <sub>3</sub> ) <sub>4</sub>                   | 79/15                               |
| 6                     | 40          | Pd(PPh <sub>3</sub> ) <sub>4</sub>                   | 5/3                                 |
| 7                     | 10          | Pd(MeCN) <sub>2</sub> Cl <sub>2</sub>                | 52/2                                |
| 8                     | 20          | Pd(MeCN) <sub>2</sub> Cl <sub>2</sub>                | 60/2                                |
| 9                     | 40          | Pd(MeCN) <sub>2</sub> Cl <sub>2</sub>                | 61/4                                |
| 10                    | 10          | Pd(PPh <sub>3</sub> ) <sub>2</sub> Cl <sub>2</sub>   | 81/15                               |
| <b>11</b>             | <b>20</b>   | <b>Pd(PPh<sub>3</sub>)<sub>2</sub>Cl<sub>2</sub></b> | <b>82/12</b>                        |
| 12                    | 40          | Pd(PPh <sub>3</sub> ) <sub>2</sub> Cl <sub>2</sub>   | 81/8                                |
| <b>13<sup>c</sup></b> | <b>20</b>   | <b>Pd(PPh<sub>3</sub>)<sub>2</sub>Cl<sub>2</sub></b> | <b>92(85)/7</b>                     |

<sup>a</sup>Reaction conditions (unless otherwise specified): **1a** (0.3 mmol, 1.0 equiv), **2** (2.0 equiv), [Pd] (5 mol %), K<sub>2</sub>CO<sub>3</sub> (4.0 equiv), dioxane (2 mL), 80 °C, 24 h. <sup>b</sup>Determined by <sup>19</sup>F NMR using fluorobenzene as an internal standard and number in parenthesis is isolated yield. <sup>c</sup>2.5 mL of dioxane was used.

**Table S7. Screening of Phenols.<sup>a</sup>**

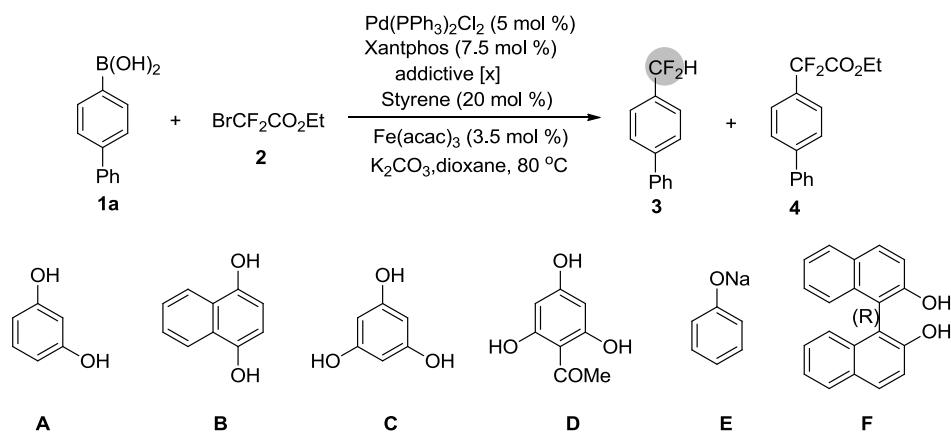

| entry    | additive            | [x equiv]          | <b>3a/4a</b> yield (%) <sup>b</sup> |
|----------|---------------------|--------------------|-------------------------------------|
| 1        | <b>A</b>            | (2.0 equiv)        | nd/nd                               |
| 2        | <b>B</b>            | (2.0 equiv)        | 18/trace                            |
| 3        | <b>C</b>            | (2.0 equiv)        | 2/nd                                |
| 4        | <b>D</b>            | (2.0 equiv)        | 3/trace                             |
| 5        | <b>E</b>            | (2.0 equiv)        | 10/9                                |
| 6        | <b>F</b>            | (2.0 equiv)        | 10/trace                            |
| <b>7</b> | <b>Hydroquinone</b> | <b>(2.0 equiv)</b> | <b>92/7</b>                         |
| 8        | Hydroquinone        | (1.5 equiv)        | 54/16                               |
| 9        | hydroquinone        | (1.0 equiv)        | 42/20                               |
| 10       | hydroquinone        | (0.5 equiv)        | 25/36                               |

<sup>a</sup>Reaction conditions (unless otherwise specified): **1a** (0.3 mmol, 1.0 equiv), **2** (2.0 equiv), K<sub>2</sub>CO<sub>3</sub> (4.0 equiv), dioxane (2.5 mL), 80 °C, 24 h. <sup>b</sup>Determined by <sup>19</sup>F NMR using fluorobenzene as an internal standard.

**Table S8. Control Experiments of Pd-Catalyzed Reaction of Arylboronic Acid **1a** with Bromodifluoroacetate.<sup>a</sup>**

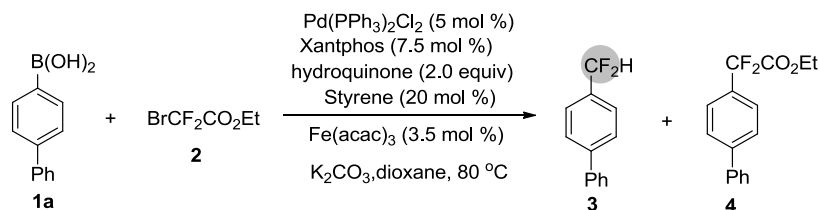

| entry     | [Fe]                        | [Pd]                                                 | ligand          | additive            | alkene         | <b>3/4</b> yield (%) <sup>b</sup> |
|-----------|-----------------------------|------------------------------------------------------|-----------------|---------------------|----------------|-----------------------------------|
| 1         | none                        | none                                                 | none            | hydroquinone        | styrene        | nd/nd                             |
| 2         | Fe(acac) <sub>3</sub>       | none                                                 | none            | hydroquinone        | styrene        | nd/nd                             |
| 3         | none                        | Pd(PPh <sub>3</sub> ) <sub>2</sub> Cl <sub>2</sub>   | none            | hydroquinone        | styrene        | nd/7                              |
| 4         | none                        | none                                                 | Xantphos        | hydroquinone        | styrene        | nd/nd                             |
| 5         | Fe(acac) <sub>3</sub>       | none                                                 | Xantphos        | hydroquinone        | styrene        | nd/nd                             |
| 6         | Fe(acac) <sub>3</sub>       | Pd(PPh <sub>3</sub> ) <sub>2</sub> Cl <sub>2</sub>   | none            | hydroquinone        | styrene        | nd/6%                             |
| 7         | none                        | Pd(PPh <sub>3</sub> ) <sub>2</sub> Cl <sub>2</sub>   | Xantphos        | hydroquinone        | styrene        | 45/trace                          |
| 8         | none                        | Pd(PPh <sub>3</sub> ) <sub>2</sub> Cl <sub>2</sub>   | Xantphos        | hydroquinone        | none           | 65/trace                          |
| 9         | Fe(acac) <sub>3</sub>       | Pd(PPh <sub>3</sub> ) <sub>2</sub> Cl <sub>2</sub>   | Xantphos        | hydroquinone        | none           | 45/39                             |
| 10        | Fe(acac) <sub>3</sub>       | Pd(PPh <sub>3</sub> ) <sub>2</sub> Cl <sub>2</sub>   | Xantphos        | none                | styrene        | nd/33%                            |
| <b>11</b> | <b>Fe(acac)<sub>3</sub></b> | <b>Pd(PPh<sub>3</sub>)<sub>2</sub>Cl<sub>2</sub></b> | <b>Xantphos</b> | <b>hydroquinone</b> | <b>styrene</b> | <b>92/7</b>                       |

<sup>a</sup>Reaction conditions (unless otherwise specified): **1a** (0.3 mmol, 1.0 equiv), **2** (2.0 equiv), K<sub>2</sub>CO<sub>3</sub> (4.0 equiv), dioxane (2.5 mL), 80 °C, 24 h. <sup>b</sup>Determined by <sup>19</sup>F NMR using fluorobenzene as an internal standard.

## Mechanistic Studies

### Scheme S1. Kinetic Studies of the Reaction of **1a** with **2** or **V**.

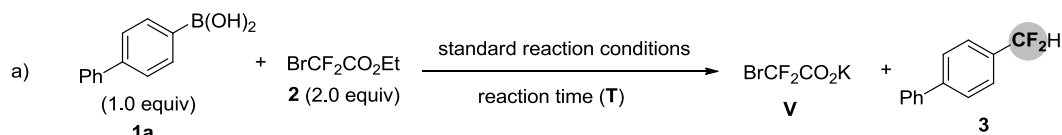

| Entry | Time   | <b>2</b> (Conversion) | <b>V</b> (Yield) | <b>3</b> (Yield) |
|-------|--------|-----------------------|------------------|------------------|
| 1     | 10 min | 29%                   | 23%              | 0%               |
| 2     | 30 min | 64%                   | 60%              | 1%               |
| 3     | 1.0 h  | 80%                   | 76%              | 3%               |
| 4     | 1.5 h  | 99%                   | 83%              | 13%              |
| 5     | 2.0 h  | 99%                   | 79%              | 20%              |
| 6     | 2.5 h  | 99%                   | 76%              | 25%              |
| 7     | 3.0 h  | 99%                   | 72%              | 26%              |
| 8     | 4.0 h  | 100%                  | 63%              | 32%              |
| 9     | 5.0 h  | 100%                  | 56%              | 39%              |
| 10    | 6.0 h  | 100%                  | 49%              | 49%              |

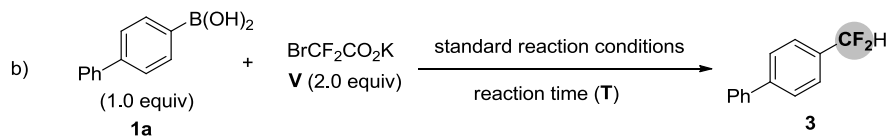

| Entry | Time   | V( Recovery) | <b>3</b> (Yield) |
|-------|--------|--------------|------------------|
| 1     | 10 min | 90%          | 0%               |
| 2     | 30 min | 87%          | 3%               |
| 3     | 1.0 h  | 83%          | 7%               |
| 4     | 1.5 h  | 78%          | 10%              |
| 5     | 2.0 h  | 72%          | 15%              |
| 6     | 2.5 h  | 70%          | 17%              |
| 7     | 3.0 h  | 66%          | 22%              |
| 8     | 4.0 h  | 58%          | 27%              |
| 9     | 5.0 h  | 50%          | 33%              |
| 10    | 6.0 h  | 43%          | 44%              |

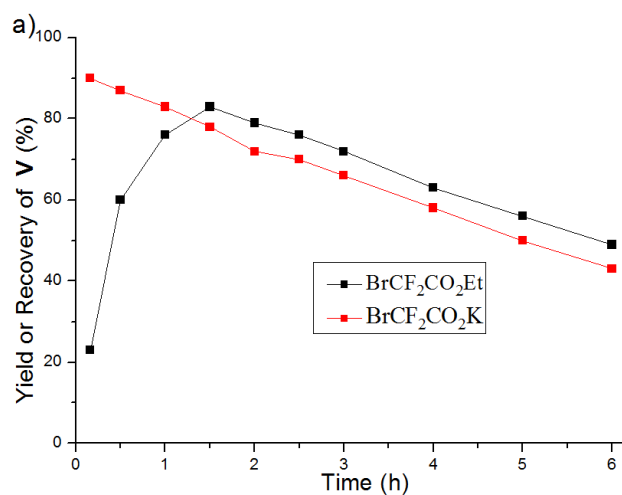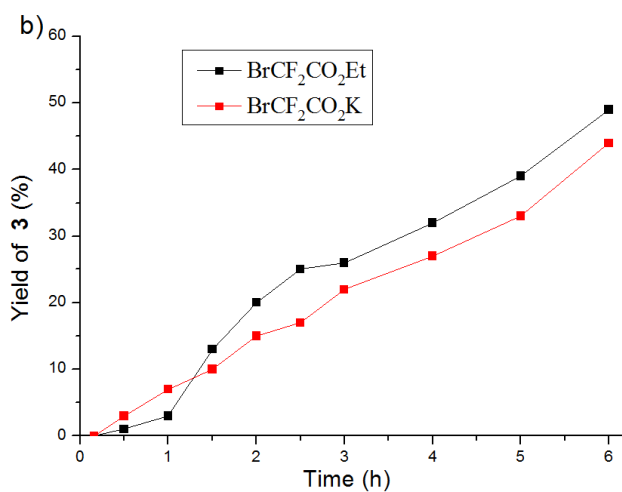

**Figure S1.** a) Yield (black line) or Recovery (red line) of **V** and b) Yield of **3** with BrCF<sub>2</sub>CO<sub>2</sub>Et (black line) or BrCF<sub>2</sub>CO<sub>2</sub>K (red line) as a Starting Material.

**Procedure:** To a 25 mL of Schlenk tube were added anhydrous  $K_2CO_3$  (powder, 4.0 equiv), and hydroquinone (2.0 equiv) in glove box, followed by  $Fe(acac)_3$  (3.5 mol %),  $PdCl_2(PPh_3)_2$  (5 mol %), Xantphos (7.5 mol %), aryl boronic acid **1a** (0.3 mmol), styrene (20 mol %), ethyl bromodifluoroacetate **2** (2.0 equiv) or  $BrCF_2CO_2K$  (2.0 equiv), and fresh distilled dioxane (2.5 mL). The reaction mixture was heated to 80 °C (oil bath). The reaction was monitored by  $^{19}F$  NMR using fluorobenzene as an internal standard.

**Note:** Attempt to isolation of pure **V** failed. The structure of **V** was characterized by  $^{19}F$  NMR,  $^{13}C$  NMR, IR, and MS from a mixture of **V** and hydroquinone. All of these data are consistence with the data of  $BrCF_2CO_2K$ . It also should be mentioned that the  $^1H$  NMR spectroscopy of the mixture of **V** and hydroquinone only showed the spectrum of hydroquinone. Therefore, compound **V** was assigned to be  $BrCF_2CO_2K$ . Compound **V**:  $^{19}F$  NMR (376 MHz, DMSO)  $\delta$  -52.5 (s, 2 F);  $^{13}C$  NMR (100 MHz, DMSO)  $\delta$  160.9 (t,  $J$  = 22.9 Hz), 117.2 (t,  $J$  = 325.2 Hz). IR (thin film)  $\nu_{max}$  1687, 1385, 1143  $cm^{-1}$ ; MS (ESI):  $m/z$  (%), 172.8 ( $M^+-K^+$ ), 174.9 ( $M^+-K^+$ ).

#### Scheme S2. Reaction of Compound **4** or **4'** with Hydroquinone under Standard Reaction Conditions

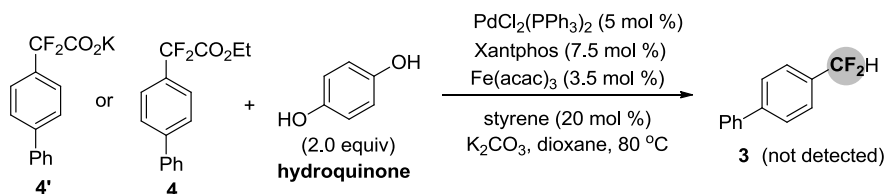

**Procedure:** To a 25 mL of Schlenk tube were added anhydrous  $K_2CO_3$  (powder, 4.0 equiv), and hydroquinone (2.0 equiv) in glove box, followed by  $Fe(acac)_3$  (3.5 mol %),  $PdCl_2(PPh_3)_2$  (5 mol %), Xantphos (7.5 mol %), compound **4** or **4'** (0.3 mmol, 1.0 equiv), styrene (20 mol %) and fresh distilled dioxane (2.5 mL). The reaction mixture was heated to 80 °C (oil bath). After stirring for 24 h, the reaction was cooled to room temperature.  $^{19}F$  NMR spectroscopy showed no compound **3** was formed.

## The Role of Hydroquinone for the Reaction

### Scheme S3. The Roles of Hydroquinone for the Reaction

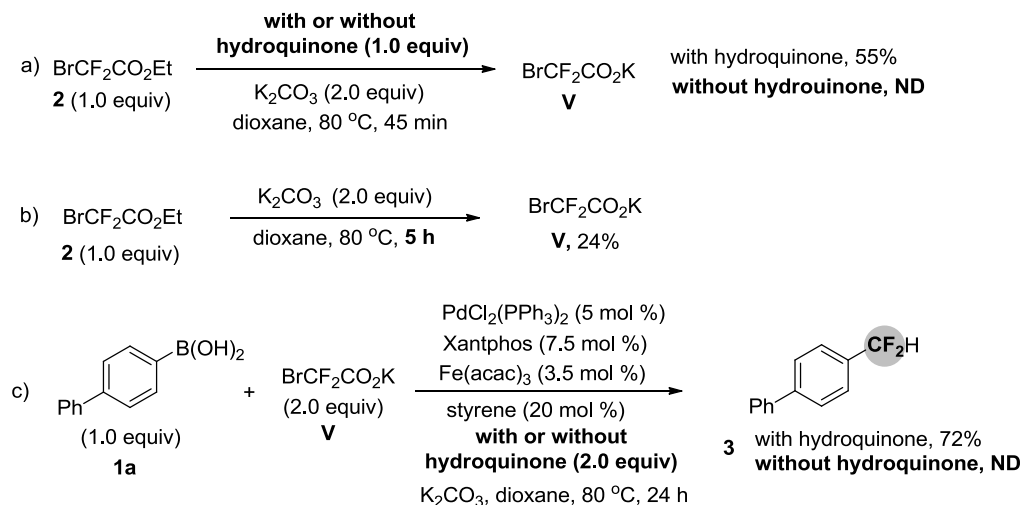

**Procedure for the reaction of bromodifluoroacetate **2** with  $\text{K}_2\text{CO}_3$  in the presence of hydroquinone:** To a 25 mL of Schlenk tube were added anhydrous  $\text{K}_2\text{CO}_3$  (powder, 2.0 equiv), hydroquinone (1.0 equiv), ethyl bromodifluoroacetate **2** (1.0 equiv, 0.6 mmol) and fresh distilled dioxane (2.5 mL) under  $\text{N}_2$ . The reaction mixture was heated to  $80^\circ\text{C}$  (oil bath). The reaction was monitored by  $^{19}\text{F}$  NMR using fluorobenzene as an internal standard.

### The Role of $\text{Fe}(\text{acac})_3$ for the Reaction

The comparisons of reaction of **1a** with **2** or **V** in the presence of hydroquinone with or without  $\text{Fe}(\text{acac})_3$  and styrene (Scheme S5-S6 and Figure S2-S3) revealed that the iron species could facilitate the transformation of **V** into final product **3**.

### Scheme S4. Cross-Coupling Reaction between Arylboronic Acid **1a** and Bromodifluoroacetate **2** with or without $\text{Fe}(\text{acac})_3$ and Styrene.

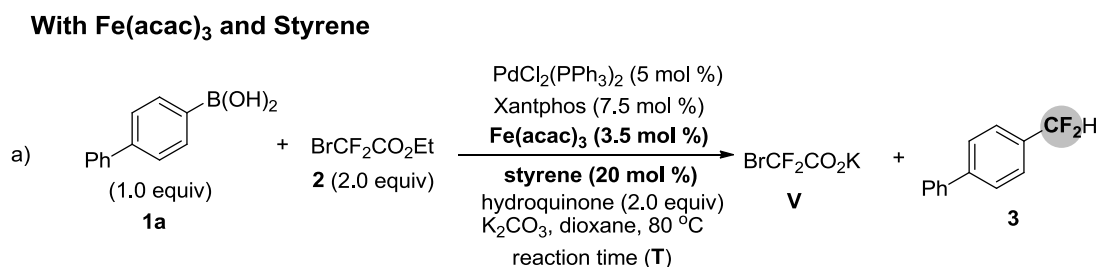

| Entry | Time   | <b>2</b> (Conversion) | <b>V</b> (Yield) | <b>3</b> (Yield) |
|-------|--------|-----------------------|------------------|------------------|
| 1     | 10 min | 29%                   | 23%              | 0%               |
| 2     | 30 min | 64%                   | 60%              | 1%               |
| 3     | 1.0 h  | 80%                   | 76%              | 3%               |
| 4     | 1.5 h  | 99%                   | 83%              | 13%              |
| 5     | 2.0 h  | 99%                   | 79%              | 20%              |
| 6     | 2.5 h  | 99%                   | 76%              | 25%              |
| 7     | 3.0 h  | 99%                   | 72%              | 26%              |
| 8     | 4.0 h  | 100%                  | 63%              | 32%              |
| 9     | 5.0 h  | 100%                  | 56%              | 39%              |
| 10    | 6.0 h  | 100%                  | 49%              | 49%              |

### Without Fe(acac)<sub>3</sub> and Styrene

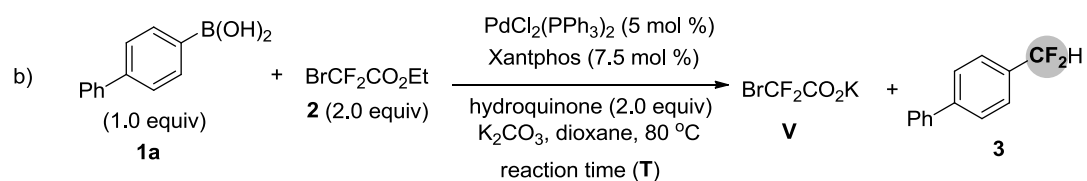

| Entry | Time   | <b>2</b> (Conversion) | <b>V</b> (Yield) | <b>3</b> (Yield) |
|-------|--------|-----------------------|------------------|------------------|
| 1     | 10 min | 40%                   | 60%              | 0%               |
| 2     | 30 min | 93%                   | 91%              | 0%               |
| 3     | 1.0 h  | 98%                   | 93%              | 2%               |
| 4     | 1.5 h  | 100%                  | 92%              | 10%              |
| 5     | 2.0 h  | 100%                  | 70%              | 14%              |
| 6     | 2.5 h  | 100%                  | 68%              | 18%              |
| 7     | 3.0 h  | 100%                  | 67%              | 20%              |
| 8     | 4.0 h  | 100%                  | 60%              | 25%              |
| 9     | 5.0 h  | 100%                  | 58%              | 32%              |
| 10    | 6.0 h  | 100%                  | 55%              | 34%              |



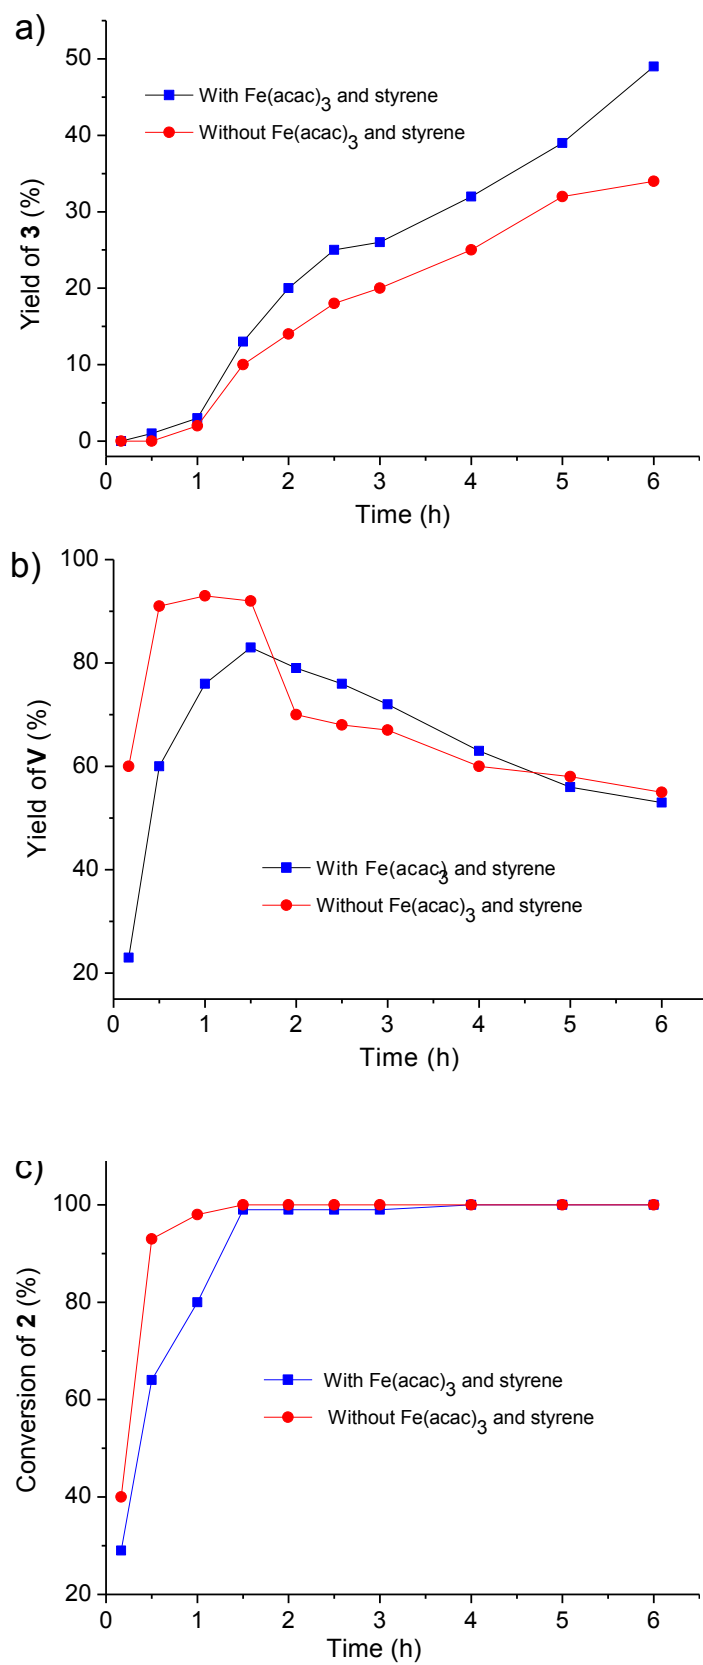

**Figure S2.** a) Yield of **3**; b) Yield of **V**; c) Conversion of **2**

**Procedure (with Fe(acac)<sub>3</sub> and styrene):** To a 25 mL of Schlenk tube were added anhydrous K<sub>2</sub>CO<sub>3</sub> (powder, 4.0 equiv), and hydroquinone (2.0 equiv) in glove box, followed by Fe(acac)<sub>3</sub> (3.5 mol %), PdCl<sub>2</sub>(PPh<sub>3</sub>)<sub>2</sub> (5 mol %), Xantphos (7.5 mol %), aryl boronic acid **1a** (0.3 mmol), styrene (20 mol %), ethyl bromodifluoroacetate **2** (2.0 equiv), and fresh distilled dioxane (2.5 mL). The reaction mixture was heated to 80 °C (oil bath). The reaction was monitored by <sup>19</sup>F NMR using fluorobenzene as an internal standard.

**Scheme S5. Cross-Coupling Reaction between Arylboronic Acid 1a and BrCF<sub>2</sub>CO<sub>2</sub>K V with or without Fe(acac)<sub>3</sub> and Styrene.**

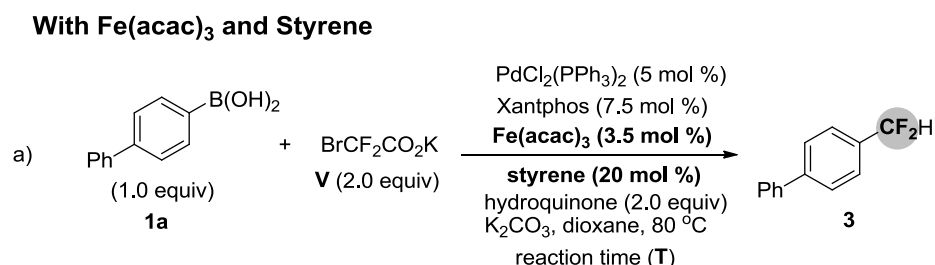

| Entry | Time   | V(Recovery) | <b>3</b> (Yield) |
|-------|--------|-------------|------------------|
| 1     | 10 min | 90%         | 0%               |
| 2     | 30 min | 87%         | 3%               |
| 3     | 1.0 h  | 83%         | 7%               |
| 4     | 1.5 h  | 78%         | 10%              |
| 5     | 2.0 h  | 72%         | 15%              |
| 6     | 2.5 h  | 70%         | 17%              |
| 7     | 3.0 h  | 66%         | 22%              |
| 8     | 4.0 h  | 58%         | 27%              |
| 9     | 5.0 h  | 50%         | 33%              |
| 10    | 6.0 h  | 43%         | 44%              |

### Without Fe(acac)<sub>3</sub> and Styrene

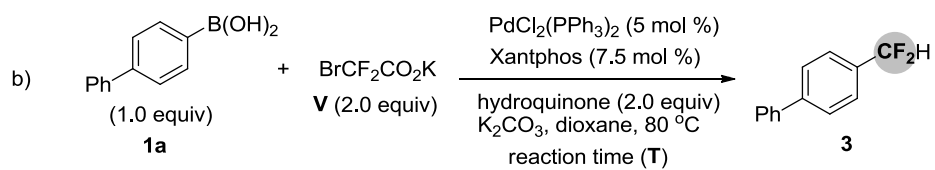

| Entry | Time   | V(Recovery) | 3 (Yield) |
|-------|--------|-------------|-----------|
| 1     | 10 min | 100%        | 0%        |
| 2     | 30 min | 100%        | 0%        |
| 3     | 1.0 h  | 95%         | 1%        |
| 4     | 1.5 h  | 82%         | 2%        |
| 5     | 2.0 h  | 76%         | 7%        |
| 6     | 2.5 h  | 73%         | 8%        |
| 7     | 3.0 h  | 70%         | 10%       |
| 8     | 4.0 h  | 66%         | 15%       |
| 9     | 5.0 h  | 60%         | 19%       |
| 10    | 6.0 h  | 50%         | 27%       |

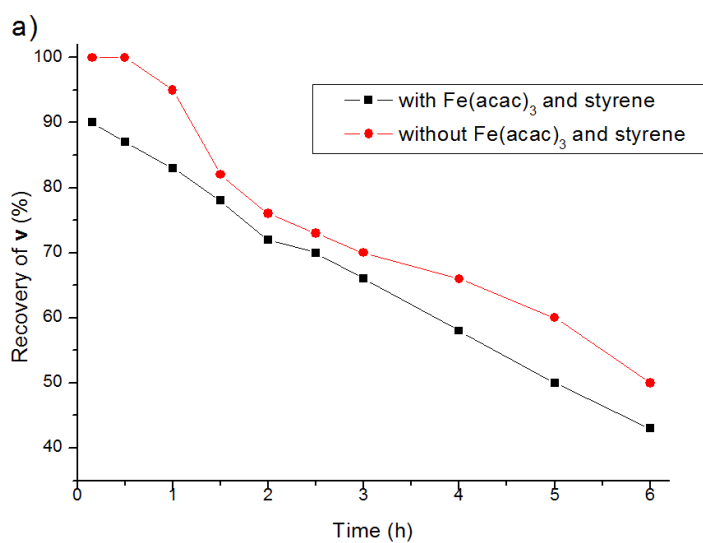

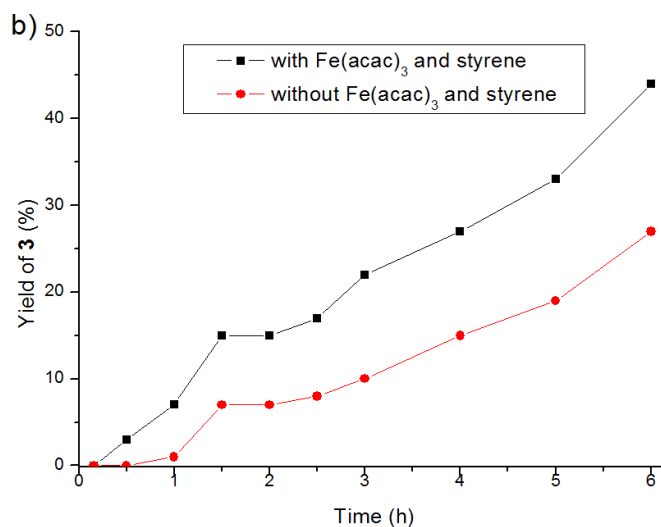

Figure S3. a) Recovery of **V**; b) Yield of **3**.

### Identification of Difluorocarbene

#### Scheme S6. Reaction of **1a** with **V** under Standard Reaction Conditions in the Presence of Pyridine-2-thiol

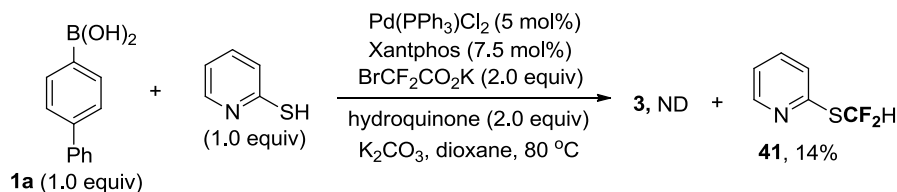

**Procedure:** To a 25 mL of Schlenk tube were added anhydrous K<sub>2</sub>CO<sub>3</sub> (powder, 4.0 equiv), hydroquinone (2.0 equiv), 2-mercaptopyridine, BrCF<sub>2</sub>CO<sub>2</sub>K **V** (0.6 mmol), PdCl<sub>2</sub>(PPh<sub>3</sub>)<sub>2</sub> (5 mol %), Xantphos (7.5 mol %), aryl boronic acid **1a** (0.3 mmol), and fresh distilled dioxane (2.5 mL) under N<sub>2</sub>. The reaction mixture was heated to 80 °C (oil bath) for 24 h and provided **41** in 14% yield (determined by <sup>19</sup>F NMR using fluorobenzene as an internal standard). Compound **41**: This compound is known.<sup>1</sup> <sup>19</sup>F NMR (376 MHz, CDCl<sub>3</sub>) δ -97.3 (d, *J* = 56.1 Hz, 2 F). MS (EI): *m/z* (%) 161 (M<sup>+</sup>).

### Scheme S7. Reaction of **1a** with **V** in the Presence of Palladium Complex **VI**.

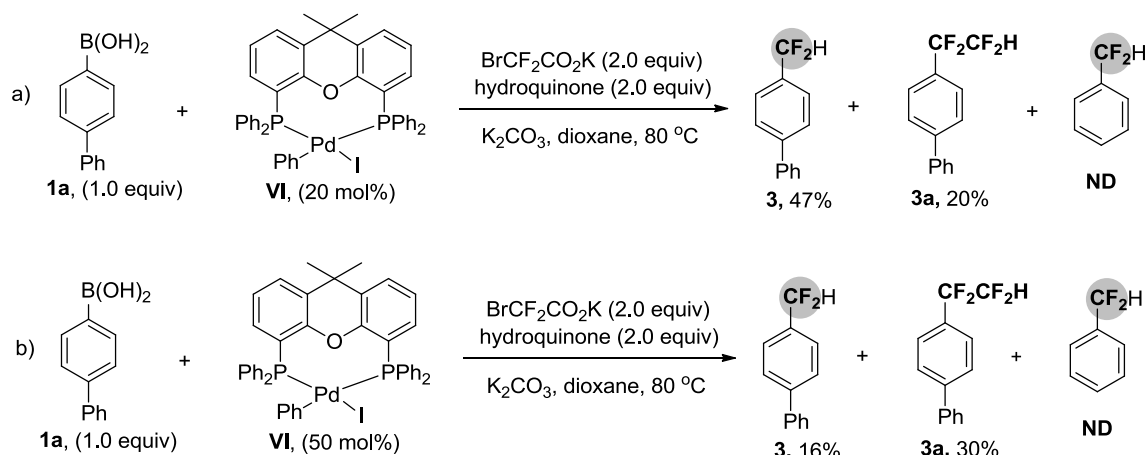

**Procedure:** To a 25 mL of Schlenk tube were added anhydrous  $K_2CO_3$  (powder, 4.0 equiv), hydroquinone (2.0 equiv),  $BrCF_2CO_2K$  **V** (0.6 mmol),  $[PhPd(Xantphos)I]^2$  (20 mol% or 50 mol%), aryl boronic acid **1a** (0.3 mmol), and fresh distilled dioxane (2.5 mL) under  $N_2$ . The reaction mixture was heated to 80 °C (oil bath) for 24 h and provided compound **3** and 4-(1,1,2,2-tetrafluoroethyl)-1,1'-biphenyl **3a** (the yields were determined by  $^{19}F$  NMR using fluorobenzene as an internal standard).

**4-(1,1,2,2-tetrafluoroethyl)-1,1'-biphenyl (3a).** This compound is known.<sup>3</sup>  $^1H$  NMR (400 MHz,  $CDCl_3$ )  $\delta$  7.12-7.69 (m, 2 H), 7.64-7.59 (m, 4 H), 7.49-7.45 (m, 2 H), 7.43-7.38 (m, 1 H), 5.96 (tt,  $J = 54.4$  Hz,  $J = 2.4$  Hz, 1 H).  $^{19}F$  NMR (376 MHz,  $CDCl_3$ )  $\delta$  -113.4 (m, 2 F), -134.1 (dt,  $J = 54.4$  Hz,  $J = 3.8$  Hz, 2 F). MS (EI):  $m/z$  (%) 254 ( $M^+$ ), 203 (100). HRMS calcd. for  $C_{14}H_{10}F_4$  ( $M^+$ ): 254.0719; Found: 254.0718.

### Scheme S8. Cross-Coupling Reaction between **1a** and **2** in the Presence of $Pd(PPh_3)_4$ with or without $Fe(acac)_3$ .

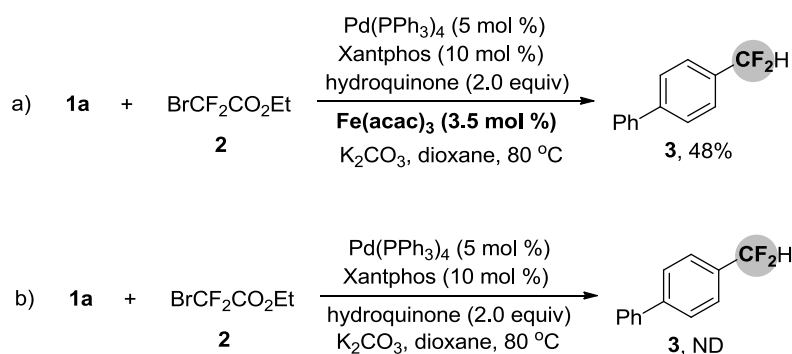

**Procedure (with Fe(acac)<sub>3</sub>):** To a 25 mL of Schlenk tube were added anhydrous K<sub>2</sub>CO<sub>3</sub> (powder, 4.0 equiv) and hydroquinone (2.0 equiv) in glove box, followed by Fe(acac)<sub>3</sub> (3.5 mol %), Pd(PPh<sub>3</sub>)<sub>4</sub> (5 mol %), Xantphos (10 mol %), aryl boronic acid **1a** (0.3 mmol), ethyl bromodifluoroacetate **2** (2.0 equiv), and fresh distilled dioxane (2.0 mL). The reaction mixture was heated to 80 °C (oil bath). The reaction was monitored by <sup>19</sup>F NMR using fluorobenzene as an internal standard.

### X-Ray Photoelectron Spectroscopy (XPS) Analysis of the Reaction

#### Scheme S9a. X-Ray Photoelectron Spectroscopy (XPS) Analysis of Reaction of **1a** with **2** under Standard Reaction Conditions

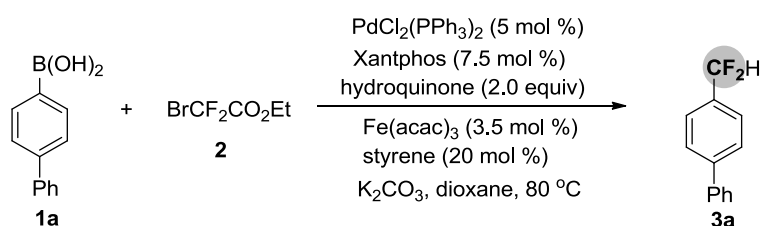

**Procedure:** To a 25 mL of Schlenk tube were added anhydrous K<sub>2</sub>CO<sub>3</sub> (powder, 4.0 equiv), and hydroquinone (2.0 equiv) in glove box, followed by Fe(acac)<sub>3</sub> (3.5 mol %), PdCl<sub>2</sub>(PPh<sub>3</sub>)<sub>2</sub> (5 mol %), Xantphos (7.5 mol %), aryl boronic acid **1a** (0.3 mmol), styrene (20 mol %), ethyl bromodifluoroacetate **2** (2.0 equiv), and fresh distilled dioxane (2.5 mL). The reaction mixture was heated to 80 °C (oil bath). After stirring for 24 h, the reaction was cooled to room temperature and concentrated under N<sub>2</sub>. The resulting mixture was analyzed by X-ray photoelectron spectroscopy (XPS) (**Note:** all the experiments were carried out under N<sub>2</sub>). The XPS showed that peak corresponding to Pd<sup>II</sup> 3d<sub>5/2</sub> was observed with the binding energy at 336.65 eV, which was negatively shifted by 0.85 eV compared with free Pd(PPh<sub>3</sub>)<sub>2</sub>Cl<sub>2</sub> (Pd<sup>II</sup> 3d<sub>5/2</sub> at 337.5 eV).<sup>4</sup>

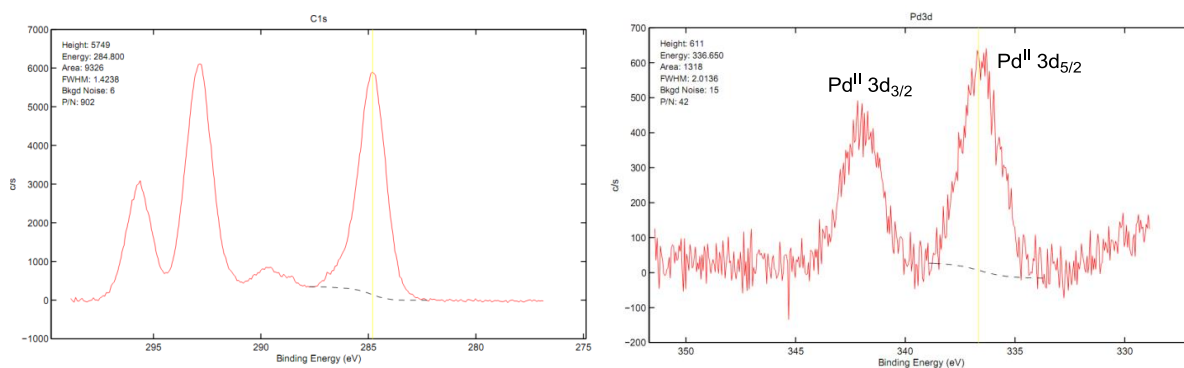

**Figure S4a.** XPS Analysis of Reaction of **1a** with **2** under Standard Reaction Conditions

**Scheme S9b. X-Ray Photoelectron Spectroscopy (XPS) Analysis of Reaction of 1a with 2 in the Absence of Fe(acac)<sub>3</sub> and Styrene.**

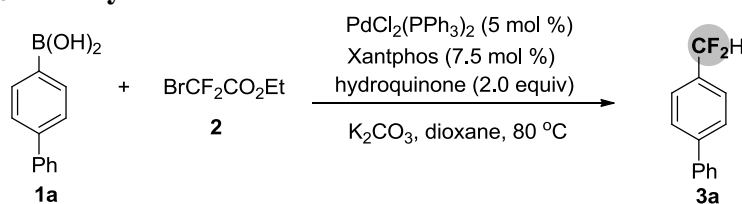

**Procedure:** To a 25 mL of Schlenk tube were added anhydrous K<sub>2</sub>CO<sub>3</sub> (powder, 4.0 equiv), and hydroquinone (2.0 equiv) in glove box, followed by PdCl<sub>2</sub>(PPh<sub>3</sub>)<sub>2</sub> (5 mol %), Xantphos (7.5 mol %), aryl boronic acid **1a** (0.3 mmol), ethyl bromodifluoroacetate **2** (2.0 equiv), and fresh distilled dioxane (2.5 mL). The reaction mixture was heated to 80 °C (oil bath). After stirring for 24 h, the reaction was cooled to room temperature and concentrated under N<sub>2</sub>. The resulting mixture was analyzed by X-ray photoelectron spectroscopy (XPS) (**Note:** all the experiments were carried out under N<sub>2</sub>). The XPS showed that peak corresponding to Pd<sup>II</sup> 3d<sub>5/2</sub> was observed with the binding energy at 336.85 eV, which was negatively shifted by 0.65 eV compared with free Pd(PPh<sub>3</sub>)<sub>2</sub>Cl<sub>2</sub> (Pd<sup>II</sup> 3d<sub>5/2</sub> at 337.5 eV).<sup>4</sup>

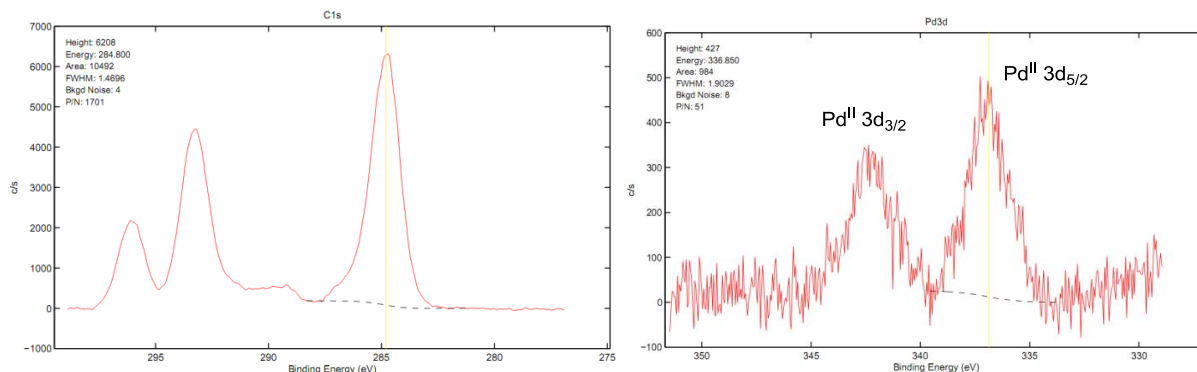

**Figure S4b. XPS Analysis of Reaction of 1a with 2 in the Absence of Fe(acac)<sub>3</sub> and Styrene**

**Scheme S10c. X-Ray Photoelectron Spectroscopy (XPS) Analysis of Reaction of 1a with 2 in the Presence of Pd(PPh<sub>3</sub>)<sub>4</sub> and Fe(acac)<sub>3</sub>.**

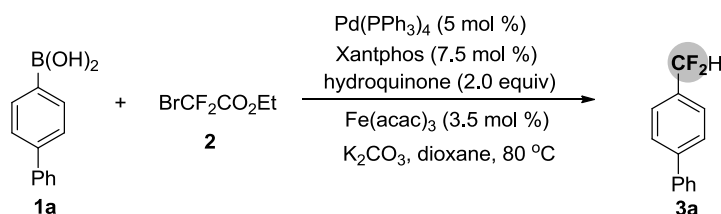

**Procedure:** To a 25 mL of Schlenk tube were added anhydrous K<sub>2</sub>CO<sub>3</sub> (powder, 4.0 equiv), and hydroquinone (2.0 equiv) in glove box, followed by Fe(acac)<sub>3</sub> (3.5 mol %), Pd(PPh<sub>3</sub>)<sub>4</sub> (5 mol %), Xantphos (7.5 mol %), aryl boronic acid **1a** (0.3 mmol), ethyl bromodifluoroacetate **2** (2.0 equiv), and fresh distilled dioxane (2.5 mL). The reaction mixture was heated to 80 °C (oil bath). After stirring for 24 h, the reaction was cooled to room temperature. After stirring for 24 h, the reaction was cooled to

room temperature and concentrated under N<sub>2</sub>. The resulting mixture was analyzed by X-ray photoelectron spectroscopy (XPS) (**Note:** all the experiments were carried out under N<sub>2</sub>). The XPS showed that peak corresponding to Pd<sup>II</sup> 3d<sub>5/2</sub> was observed with the binding energy at 336.80 eV, which was negatively shifted by 0.70 eV compared with free Pd(PPh<sub>3</sub>)<sub>2</sub>Cl<sub>2</sub> (Pd<sup>II</sup> 3d<sub>5/2</sub> at 337.5 eV).<sup>4</sup>

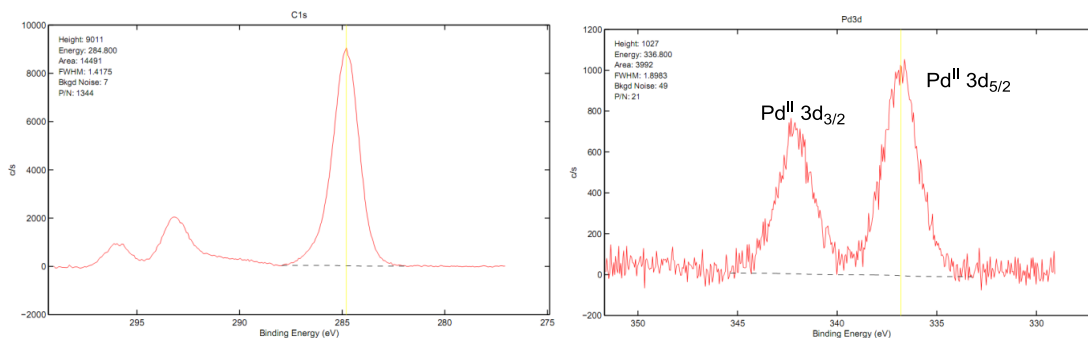

**Figure S4c.** XPS Analysis of Reaction of **1a** with **2** in the Presence of Pd(PPh<sub>3</sub>)<sub>4</sub> and Fe(acac)<sub>3</sub>

### General Procedure for Pd-Catalyzed Difluoromethylation of Arylboronic Acids with Bromodifluoroacetate

To a 25 mL of Schlenk tube were added anhydrous K<sub>2</sub>CO<sub>3</sub> (powder, 4.0 equiv), and hydroquinone (2.0 equiv) in glove box, followed by Fe(acac)<sub>3</sub> (3.5 mol %), PdCl<sub>2</sub>(PPh<sub>3</sub>)<sub>2</sub> (5 mol %), Xantphos (7.5 mol %), aryl boronic acid **1** (0.3 mmol), styrene (20 mol %), ethyl bromodifluoroacetate **2** (2.0 equiv), and fresh distilled dioxane (2.5 mL). The reaction mixture was heated to 80 °C (oil bath). After stirring for 24 h, the reaction was cooled to room temperature. The reaction mixture was diluted with EtOAc and filtered with a pad of celite. The filtrate was concentrated, and the residue was purified with silica gel chromatography to give product.

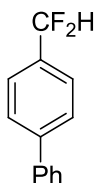

**4-(Difluoromethyl)-1,1'-biphenyl (3).** The product (52 mg, 85% yield) as a white solid (m.p. 78-82 °C) was purified with silica gel chromatography (Petroleum ether). This compound is known.<sup>5</sup> <sup>1</sup>H NMR (300 MHz, CDCl<sub>3</sub>) δ 7.69-7.67 (m, 2 H), 7.62-7.58 (m, 4 H), 7.49-7.45 (m, 2 H), 7.41-7.37 (m, 1 H), 6.71 (t, *J* = 56.4 Hz, 1 H). <sup>19</sup>F NMR (282 MHz, CDCl<sub>3</sub>) δ -110.7 (d, *J* = 56.4 Hz, 2 F). <sup>13</sup>C NMR (125.7 MHz, CDCl<sub>3</sub>) δ 143.7 (t, *J* = 2.0 Hz), 140.2, 133.2 (t, *J* = 22.4 Hz), 128.9, 127.9, 127.4, 127.2, 126.0 (t, *J* = 6.0 Hz), 114.7 (t, *J* = 238.3 Hz). MS (EI): *m/z* (%) 204 (M<sup>+</sup>), 204 (100). HRMS calcd. for



C<sub>13</sub>H<sub>10</sub>F<sub>2</sub> (M<sup>+</sup>): 204.0751; Found: 204.0753.

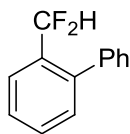

**2-(Difluoromethyl)-1,1'-biphenyl (5).** The product (39 mg, 64% yield) as a colorless oil was purified with silica gel chromatography (Petroleum ether). <sup>1</sup>H NMR (400 MHz, CDCl<sub>3</sub>) δ 7.79 (dd, *J* = 6.8 Hz, *J* = 2.0 Hz, 1 H), 7.54-7.48 (m, 2 H), 7.47-7.41 (m, 3 H), 7.36-7.34 (m, 3 H), 6.54 (t, *J* = 54.8 Hz, 1 H). <sup>19</sup>F NMR (376 MHz, CDCl<sub>3</sub>) δ -107.4 (d, *J* = 54.8 Hz, 2 F). <sup>13</sup>C NMR (100 MHz, CDCl<sub>3</sub>) δ 141.4 (t, *J* = 6.6 Hz), 138.6, 131.7 (t, *J* = 22.2 Hz), 130.5 (t, *J* = 1.8 Hz), 130.2, 129.4, 128.4, 127.9, 127.8, 125.6 (t, *J* = 5.2 Hz), 113.1 (t, *J* = 234.6 Hz). MS (EI): *m/z* (%) 204 (M<sup>+</sup>), 183, 154, 58 (100). HRMS calcd. for C<sub>13</sub>H<sub>10</sub>F<sub>2</sub> (M<sup>+</sup>): 204.0751; Found: 204.0753.

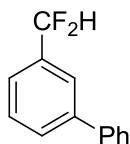

**3-(Difluoromethyl)-1,1'-biphenyl (6).** The product (54 mg, 89% yield) as a colorless oil was purified with silica gel chromatography (Petroleum ether). <sup>1</sup>H NMR (400 MHz, CDCl<sub>3</sub>) δ 7.75 (s, 1 H), 7.73-7.71 (m, 1 H), 7.63-7.62 (m, 1 H), 7.61-7.60 (m, 1 H), 7.55 (t, *J* = 7.2 Hz, 1 H), 7.52-7.46 (m, 3 H), 7.40 (tt, *J* = 7.2 Hz, 1 H), *J* = 1.2 Hz, 1 H), 6.72 (t, *J* = 56.4 Hz, 1 H). <sup>19</sup>F NMR (376 MHz, CDCl<sub>3</sub>) δ -110.6 (d, *J* = 56.4 Hz, 2 F). <sup>13</sup>C NMR (100 MHz, CDCl<sub>3</sub>) δ 141.9, 140.2, 134.9 (t, *J* = 22.0 Hz), 129.5 (t, *J* = 1.9 Hz), 129.2, 128.9, 127.8, 127.2, 124.4 (t, *J* = 5.9 Hz), 124.3 (t, *J* = 5.9 Hz), 114.8 (t, *J* = 237.6 Hz). MS (EI): *m/z* (%) 204 (M<sup>+</sup>), 204 (100). HRMS calcd. for C<sub>13</sub>H<sub>10</sub>F<sub>2</sub> (M<sup>+</sup>): 204.0751; Found: 204.0754.

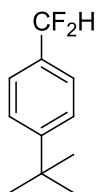

**1-(Tert-butyl)-4-(difluoromethyl)benzene (7).** The product (33 mg, 60% yield) as a colorless oil was purified with silica gel chromatography (Petroleum ether). This compound is known.<sup>5</sup> <sup>1</sup>H NMR (400 MHz, CDCl<sub>3</sub>) δ 7.49 (d, *J* = 8.8 Hz, 2 H), 7.45 (d, *J* = 8.8 Hz, 2 H), 6.64 (t, *J* = 56.8 Hz, 1 H), 1.35 (s,

9 H).  $^{19}\text{F}$  NMR (375 MHz,  $\text{CDCl}_3$ )  $\delta$  -109.9 (d,  $J$  = 56.8 Hz, 2 F).  $^{13}\text{C}$  NMR (125.7 MHz,  $\text{CDCl}_3$ )  $\delta$  153.9 (t,  $J$  = 2.0 Hz), 131.6 (t,  $J$  = 22.4 Hz), 125.6, 125.3 (t,  $J$  = 5.8 Hz), 114.9 (t,  $J$  = 237.9 Hz), 34.8, 31.2. MS (EI):  $m/z$  (%) 184 ( $\text{M}^+$ ), 169 (100). HRMS calcd. for  $\text{C}_{11}\text{H}_{14}\text{F}_2$  ( $\text{M}^+$ ): 184.1064; Found: 184.1063.

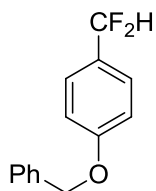

**1-(Benzyloxy)-4-(difluoromethyl)benzene (8).** The product (47 mg, 67% yield) as a white solid (m.p. 78-80 °C) was purified with silica gel chromatography (Petroleum ether/EtOAc = 40:1). This compound is known.<sup>5</sup>  $^1\text{H}$  NMR (400 MHz,  $\text{CDCl}_3$ )  $\delta$  7.45-7.43 (m, 4 H), 7.42-7.38 (m, 2 H), 7.36-7.32 (m, 1 H), 7.03 (d,  $J$  = 8.8 Hz, 2 H), 6.61 (t,  $J$  = 56.8 Hz, 1 H), 5.11 (s, 2 H).  $^{19}\text{F}$  NMR (376 MHz,  $\text{CDCl}_3$ )  $\delta$  -108.3 (d,  $J$  = 56.8 Hz, 2 F).  $^{13}\text{C}$  NMR (100 MHz,  $\text{CDCl}_3$ )  $\delta$  160.5 (t,  $J$  = 1.4 Hz), 136.5, 128.7, 128.2, 127.5, 127.2 (t,  $J$  = 6.0 Hz), 127.0, 114.9, 114.8 (t,  $J$  = 236.0 Hz), 70.1. MS (EI):  $m/z$  (%) 234 ( $\text{M}^+$ ), 91 (100). HRMS calcd. for  $\text{C}_{14}\text{H}_{12}\text{OF}_2$  ( $\text{M}^+$ ): 234.0856; Found: 234.0859. IR (thin film)  $\nu_{\text{max}}$  3032, 2940, 1615, 1598  $\text{cm}^{-1}$ .

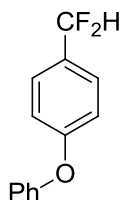

**1-(Difluoromethyl)-4-phenoxybenzene (9).** The product (41 mg, 62% yield) as a colorless oil was purified with silica gel chromatography (Petroleum ether/EtOAc = 40:1).  $^1\text{H}$  NMR (400 MHz,  $\text{CDCl}_3$ )  $\delta$  7.47 (d,  $J$  = 8.4 Hz, 2 H), 7.39-7.35 (m, 2 H), 7.17 (tt,  $J$  = 7.2 Hz,  $J$  = 1.2 Hz, 1 H), 7.06 (m, 2 H), 7.03 (s, 2 H), 6.63 (t,  $J$  = 56.4 Hz, 1 H).  $^{19}\text{F}$  NMR (376 MHz,  $\text{CDCl}_3$ )  $\delta$  -109.1 (d,  $J$  = 56.4 Hz, 2 F).  $^{13}\text{C}$  NMR (100 MHz,  $\text{CDCl}_3$ )  $\delta$  159.6 (t,  $J$  = 2.0 Hz), 156.2, 129.9, 128.9 (t,  $J$  = 22.6 Hz), 127.3 (t,  $J$  = 6.0 Hz), 124.1, 119.6, 118.3, 114.6 (t,  $J$  = 236.8 Hz). MS (EI):  $m/z$  (%) 220 ( $\text{M}^+$ ), 220 (100). HRMS calcd. for  $\text{C}_{13}\text{H}_{10}\text{OF}_2$  ( $\text{M}^+$ ): 220.0700; Found: 220.0698. IR (thin film)  $\nu_{\text{max}}$  3041, 2963, 1765, 1590  $\text{cm}^{-1}$ .

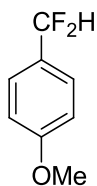

**1-(Difluoromethyl)-4-methoxybenzene (10).** The product (33 mg, 70% yield) as a colorless oil was purified with silica gel chromatography (Petroleum ether/EtOAc = 30:1). This compound is known.<sup>6</sup> <sup>1</sup>H NMR (400 MHz, CDCl<sub>3</sub>) δ 7.44 (d, *J* = 8.4 Hz, 2 H), 6.95 (d, *J* = 8.4 Hz, 2 H), 6.60 (t, *J* = 56.8 Hz, 1 H), 3.84 (s, 3 H). <sup>19</sup>F NMR (376 MHz, CDCl<sub>3</sub>) δ -108.3 (d, *J* = 56.4 Hz, 2 F). <sup>13</sup>C NMR (125.7 MHz, CDCl<sub>3</sub>) δ 161.4, 127.1 (t, *J* = 6.0 Hz), 126.8 (t, *J* = 22.8 Hz), 114.9 (t, *J* = 237.3 Hz), 113.9, 55.3. MS (EI): *m/z* (%) 158 (M<sup>+</sup>), 158 (100). HRMS calcd. for C<sub>8</sub>H<sub>8</sub>OF<sub>2</sub> (M<sup>+</sup>): 158.0543; Found: 158.0541.

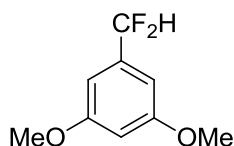

**1-(Difluoromethyl)-3,5-dimethoxybenzene (11).** The product (41 mg, 73% yield) as a colorless oil was purified with silica gel chromatography (Petroleum ether/EtOAc = 30:1). <sup>1</sup>H NMR (400 MHz, CDCl<sub>3</sub>) δ 6.64 (m, 2 H), 6.54 (m, 1 H), 6.56 (t, *J* = 56.4 Hz, 1 H), 3.82 (s, 6 H). <sup>19</sup>F NMR (376 MHz, CDCl<sub>3</sub>) δ -110.9 (d, *J* = 56.4 Hz, 2 F). <sup>13</sup>C NMR (100 MHz, CDCl<sub>3</sub>) δ 161.1, 136.4 (t, *J* = 22.0 Hz), 114.5 (t, *J* = 238.1 Hz), 103.4 (t, *J* = 6.2 Hz), 102.7 (t, *J* = 1.4 Hz), 55.5. MS (EI): *m/z* (%) 188 (M<sup>+</sup>), 188 (100). HRMS calcd. for C<sub>9</sub>H<sub>10</sub>O<sub>2</sub>F<sub>2</sub> (M<sup>+</sup>): 188.0649; Found: 188.0651.

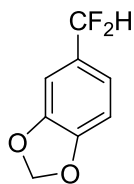

**5-(Difluoromethyl)benzo[d][1,3]dioxole (12).** The product (34 mg, 65% yield) as a colorless oil was purified with silica gel chromatography (Petroleum ether/EtOAc = 30:1). This compound is known.<sup>6</sup> <sup>1</sup>H NMR (300 MHz, CDCl<sub>3</sub>) δ 6.99-6.96 (m, 2 H), 6.84 (d, *J* = 8.4 Hz, 1 H), 6.55 (t, *J* = 56.4 Hz, 1 H), 6.02 (s, 2 H). <sup>19</sup>F NMR (282 MHz, CDCl<sub>3</sub>) δ -108.3 (d, *J* = 56.4 Hz, 2 F). <sup>13</sup>C NMR (100 MHz, CDCl<sub>3</sub>) δ 149.6 (t, *J* = 1.4 Hz), 148.1, 128.3 (t, *J* = 22.6 Hz), 120.1 (t, *J* = 7.2 Hz), 114.6 (t, *J* = 236.6 Hz), 108.2, 105.8 (t, *J* = 5.4 Hz), 101.6. MS (EI): *m/z* (%) 172 (M<sup>+</sup>), 171 (100). HRMS calcd. for C<sub>8</sub>H<sub>6</sub>O<sub>2</sub>F<sub>2</sub> (M<sup>+</sup>):

172.0336; Found: 172.0337.

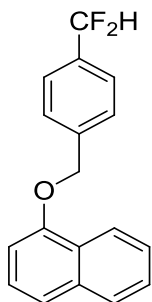

**1-((4-(Difluoromethyl)benzyl)oxy)naphthalene (13).** The product (55 mg, 65% yield) as a solid (m.p. 76-80 °C) was purified with silica gel chromatography (Petroleum ether/EtOAc = 40:1).  $^1\text{H}$  NMR (400 MHz,  $\text{CDCl}_3$ )  $\delta$  8.37-8.35 (m, 1 H), 7.84-7.82 (m, 1 H), 7.63 (d,  $J$  = 8.4 Hz, 2 H), 7.57 (d,  $J$  = 8.4 Hz, 2 H), 7.54-7.50 (m, 2 H), 7.47 (d,  $J$  = 8.4 Hz, 1 H), 7.37 (t,  $J$  = 8.4 Hz, 1 H), 6.87 (d,  $J$  = 7.6 Hz, 1 H), 6.69 (t,  $J$  = 56.4 Hz, 1 H), 5.30 (s, 2 H).  $^{19}\text{F}$  NMR (376 MHz,  $\text{CDCl}_3$ )  $\delta$  -110.7 (d,  $J$  = 56.4 Hz, 2 F).  $^{13}\text{C}$  NMR (100 MHz,  $\text{CDCl}_3$ )  $\delta$  154.2, 140.0 (t,  $J$  = 2.0 Hz), 134.6, 133.9 (t,  $J$  = 22.3 Hz), 127.6, 127.4, 126.6, 125.9 (t,  $J$  = 5.9 Hz), 125.8 (t,  $J$  = 7.9 Hz), 125.4, 122.1, 120.8, 114.7 (t,  $J$  = 237.1 Hz), 105.2, 69.4. MS (EI):  $m/z$  (%) 284 ( $\text{M}^+$ ), 141 (100). HRMS calcd. for  $\text{C}_{18}\text{H}_{14}\text{OF}_2$  ( $\text{M}^+$ ): 284.1013; Found: 284.1010

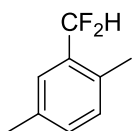

**2-(Difluoromethyl)-1,4-dimethylbenzene (14).** The product (19 mg, 41% yield;  $^{19}\text{F}$  NMR yield 71%) as a colorless oil was purified with silica gel chromatography (Petroleum ether).  $^1\text{H}$  NMR (300 MHz,  $\text{CDCl}_3$ )  $\delta$  7.32 (s, 1 H), 7.17 (d,  $J$  = 7.8 Hz, 1 H), 7.11 (d,  $J$  = 7.8 Hz, 1 H), 6.73 (t,  $J$  = 55.5 Hz, 1 H), 2.39 (s, 3 H), 2.35 (s, 3 H).  $^{19}\text{F}$  NMR (282 MHz,  $\text{CDCl}_3$ )  $\delta$  -113.3 (d,  $J$  = 55.5 Hz, 2 F). MS (EI):  $m/z$  (%) 156 ( $\text{M}^+$ ), 141, 105 (100). HRMS calcd. for  $\text{C}_9\text{H}_{10}\text{F}_2$  ( $\text{M}^+$ ): 156.0751; Found: 156.0747.

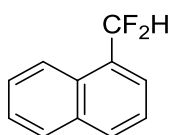

**1-(Difluoromethyl)naphthalene (15).** The product (45 mg, 84% yield) as a colorless oil was purified

with silica gel chromatography (Petroleum ether). This compound is known.<sup>7</sup>  $^1\text{H}$  NMR (400 MHz,  $\text{CDCl}_3$ )  $\delta$  8.16 (d,  $J = 8.4$  Hz, 1 H), 7.94 (d,  $J = 8.4$  Hz, 1 H), 7.90 (d,  $J = 8.4$  Hz, 1 H), 7.68 (d,  $J = 6.8$  Hz, 1 H), 7.60-7.52 (m, 2 H), 7.49 (t,  $J = 7.6$  Hz, 1 H), 7.12 (t,  $J = 55.2$  Hz, 1 H).  $^{19}\text{F}$  NMR (376 MHz,  $\text{CDCl}_3$ )  $\delta$  -110.9 (d,  $J = 55.2$  Hz, 2 F).  $^{13}\text{C}$  NMR (100 MHz,  $\text{CDCl}_3$ )  $\delta$  133.8, 131.5 (t,  $J = 1.6$  Hz), 129.7 (t,  $J = 2.8$  Hz), 129.5 (t,  $J = 20.6$  Hz), 128.8, 127.2, 126.4, 124.8 (t,  $J = 8.6$  Hz), 124.7, 123.6, 115.4 (t,  $J = 237.0$  Hz). MS (EI):  $m/z$  (%) 178 ( $\text{M}^+$ ), 178 (100). HRMS calcd. for  $\text{C}_{11}\text{H}_8\text{F}_2$  ( $\text{M}^+$ ): 178.0594; Found: 178.0590.

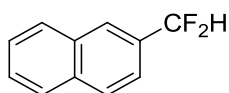

**2-(Difluoromethyl)naphthalene (16).** The product (41 mg, 77% yield) as a white solid was purified with silica gel chromatography (Petroleum ether). This compound is known.<sup>6</sup>  $^1\text{H}$  NMR (400 MHz,  $\text{CDCl}_3$ )  $\delta$  7.99 (s, 1 H), 7.95-7.89 (m, 3 H), 7.62 (d,  $J = 9.2$  Hz, 1 H), 7.59-7.54 (m, 2 H), 6.82 (t,  $J = 56.4$  Hz, 1 H).  $^{19}\text{F}$  NMR (376 MHz,  $\text{CDCl}_3$ )  $\delta$  -109.9 (d,  $J = 56.4$  Hz, 2 F).  $^{13}\text{C}$  NMR (125.7 MHz,  $\text{CDCl}_3$ )  $\delta$  134.3 (t,  $J = 1.3$  Hz), 132.6, 131.6 (t,  $J = 22.2$  Hz), 128.9, 128.5, 127.9, 127.4, 126.8, 125.9 (t,  $J = 7.7$  Hz), 122.0 (t,  $J = 4.8$  Hz), 115.1 (t,  $J = 238.4$  Hz). MS (EI):  $m/z$  (%) 178 ( $\text{M}^+$ ), 178 (100). HRMS calcd. for  $\text{C}_{11}\text{H}_8\text{F}_2$  ( $\text{M}^+$ ): 178.0594; Found: 178.0596.

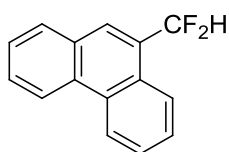

**9-(Difluoromethyl)phenanthrene (17).** The product (49 mg, 72% yield) as a white solid (m.p. 116-118 °C) was purified with silica gel chromatography (Petroleum ether).  $^1\text{H}$  NMR (400 MHz,  $\text{CDCl}_3$ )  $\delta$  8.70 (dd,  $J = 8.4$  Hz,  $J = 1.6$  Hz, 1 H), 8.64 (d,  $J = 8.4$  Hz, 1 H), 8.20-8.18 (m, 1 H), 7.93 (s, 1 H), 7.89 (d,  $J = 8.4$  Hz, 1 H), 7.72-7.58 (m, 4 H), 7.12 (t,  $J = 55.2$  Hz, 1 H).  $^{19}\text{F}$  NMR (376 MHz,  $\text{CDCl}_3$ )  $\delta$  -111.7 (d,  $J = 55.2$  Hz, 2 F).  $^{13}\text{C}$  NMR (100 MHz,  $\text{CDCl}_3$ )  $\delta$  131.4, 130.9, 130.2, 129.5, 128.3, 128.0 (t,  $J = 20.5$  Hz), 127.9 (t,  $J = 1.8$  Hz), 127.2, 127.15, 127.13, 126.8 (t,  $J = 9.4$  Hz), 124.5 (t,  $J = 1.6$  Hz), 123.3, 122.7, 115.7 (t,  $J = 237.1$  Hz). MS (EI):  $m/z$  (%) 228 ( $\text{M}^+$ ), 228 (100). HRMS calcd. for  $\text{C}_{15}\text{H}_{10}\text{F}_2$  ( $\text{M}^+$ ): 228.0751; Found: 228.0753.

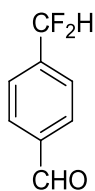

**4-(Difluoromethyl)benzaldehyde (18).** The product (27 mg, 57% yield) as a colorless oil was purified with silica gel chromatography (Petroleum ether/EtOAc = 10:1). This compound is known.<sup>7</sup> <sup>1</sup>H NMR (300 MHz, CDCl<sub>3</sub>) δ 10.08 (s, 1 H), 7.98 (d, *J* = 7.8 Hz, 2 H), 7.69 (d, *J* = 7.8 Hz, 2 H), 6.72 (t, *J* = 56.1 Hz, 1 H). <sup>19</sup>F NMR (282 MHz, CDCl<sub>3</sub>) δ -112.9 (d, *J* = 56.1 Hz, 2 F). <sup>13</sup>C NMR (100 MHz, CDCl<sub>3</sub>) δ 191.5, 139.8 (t, *J* = 22.3 Hz), 137.9, 129.9, 126.3 (t, *J* = 6.1 Hz), 113.8 (t, *J* = 238.6 Hz). MS (EI): *m/z* (%) 156 (M<sup>+</sup>), 156 (100). HRMS calcd. for C<sub>8</sub>H<sub>6</sub>OF<sub>2</sub> (M<sup>+</sup>): 156.0387; Found: 156.0384.

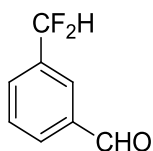

**3-(Difluoromethyl)benzaldehyde (19).** The product (26 mg, 55% yield) as a colorless oil was purified with silica gel chromatography (Petroleum ether). <sup>1</sup>H NMR (400 MHz, CDCl<sub>3</sub>) δ 10.06 (s, 1 H), 8.02 (s, 1 H), 7.99 (d, *J* = 7.6 Hz, 1 H), 7.78 (d, *J* = 7.6 Hz, 1 H), 6.65 (t, *J* = 7.6 Hz, 1 H), 6.72 (t, *J* = 56.4 Hz, 1 H). <sup>19</sup>F NMR (376 MHz, CDCl<sub>3</sub>) δ -111.7 (d, *J* = 56.4 Hz, 2 F). <sup>13</sup>C NMR (100 MHz, CDCl<sub>3</sub>) δ 191.3, 136.6, 135.5 (t, *J* = 23.1 Hz), 131.8 (t, *J* = 1.4 Hz), 131.3 (t, *J* = 5.7 Hz), 129.6, 126.8 (t, *J* = 6.3 Hz), 113.8 (t, *J* = 238.4 Hz). MS (EI): *m/z* (%) 156 (M<sup>+</sup>), 155 (100). HRMS calcd. for C<sub>8</sub>H<sub>6</sub>OF<sub>2</sub> (M<sup>+</sup>): 156.0387; Found: 156.0390.

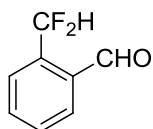

**2-(Difluoromethyl)benzaldehyde (20).** The product (25 mg, 52% yield) as a colorless oil was purified with silica gel chromatography (Petroleum ether/EtOAc = 10:1). This compound is known.<sup>7</sup> <sup>1</sup>H NMR (300 MHz, CDCl<sub>3</sub>) δ 10.18 (s, 1 H), 7.95-7.93 (m, 1 H), 7.83-7.81 (m, 1 H), 7.75-7.70 (m, 2 H), 7.43 (t, *J* = 54.9 Hz, 1 H). <sup>19</sup>F NMR (282 MHz, CDCl<sub>3</sub>) δ -112.1 (d, *J* = 54.9 Hz, 2 F). <sup>13</sup>C NMR (125.7 MHz, CDCl<sub>3</sub>) δ 191.7, 134.6, 134.1, 133.4, 131.1 (t, *J* = 1.9 Hz), 128.9, 126.5 (t, *J* = 8.3 Hz), 111.9 (t,

$J = 238.2$  Hz). IR (thin film)  $\nu_{\max}$  2959, 2926, 1732, 1715  $\text{cm}^{-1}$ . MS (EI):  $m/z$  (%) 156 ( $\text{M}^+$ ), 155 (100). HRMS calcd. for  $\text{C}_8\text{H}_6\text{OF}_2$  ( $\text{M}^+$ ): 156.0387; Found: 156.0385.

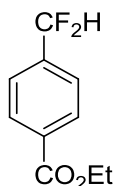

**Ethyl 4-(difluoromethyl)benzoate (21).** The product (48 mg, 80% yield) as a colorless oil was purified with silica gel chromatography (Petroleum ether/EtOAc = 10:1). This compound is known.<sup>6</sup>  $^1\text{H}$  NMR (300 MHz,  $\text{CDCl}_3$ )  $\delta$  8.12 (d,  $J = 8.4$  Hz, 2 H), 7.57 (d,  $J = 8.4$  Hz, 2 H), 6.69 (t,  $J = 56.1$  Hz, 1 H), 4.39 (q,  $J = 7.2$  Hz, 2 H), 1.40 (t,  $J = 7.2$  Hz, 3 H).  $^{19}\text{F}$  NMR (376 MHz,  $\text{CDCl}_3$ )  $\delta$  -112.2 (d,  $J = 56.1$  Hz, 2 F).  $^{13}\text{C}$  NMR (100 MHz,  $\text{CDCl}_3$ )  $\delta$  165.8, 138.3 (t,  $J = 22.3$  Hz), 132.6, 129.9, 125.6 (t,  $J = 5.9$  Hz), 114.0 (t,  $J = 238.4$  Hz), 61.4, 14.3. IR (thin film)  $\nu_{\max}$  2983, 2930, 1767, 1723  $\text{cm}^{-1}$ . MS (EI):  $m/z$  (%) 200 ( $\text{M}^+$ ), 199, 172, 155 (100). HRMS calcd. for  $\text{C}_{10}\text{H}_{10}\text{O}_2\text{F}_2$  ( $\text{M}^+$ ): 200.0649; Found: 200.0648.

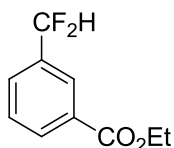

**Ethyl 3-(difluoromethyl)benzoate (22).** The product (45 mg, 75% yield) as a colorless oil was purified with silica gel chromatography (Petroleum ether/EtOAc = 10:1).  $^1\text{H}$  NMR (400 MHz,  $\text{CDCl}_3$ )  $\delta$  8.18-8.15 (m, 2 H), 7.71 (d,  $J = 7.6$  Hz, 1 H), 7.55 (t,  $J = 7.6$  Hz, 1 H), 6.69 (t,  $J = 56.0$  Hz, 1 H), 4.41 (q,  $J = 6.8$  Hz, 2 H), 1.41 (t,  $J = 6.8$  Hz, 3 H).  $^{19}\text{F}$  NMR (376 MHz,  $\text{CDCl}_3$ )  $\delta$  -111.1 (d,  $J = 56.0$  Hz, 2 F).  $^{13}\text{C}$  NMR (100 MHz,  $\text{CDCl}_3$ )  $\delta$  165.7, 134.7 (t,  $J = 22.5$  Hz), 131.7 (t,  $J = 1.3$  Hz), 131.1, 129.7 (t,  $J = 5.6$  Hz), 128.9, 126.9 (t,  $J = 6.1$  Hz), 114.2 (t,  $J = 238.1$  Hz), 61.4, 14.3. IR (thin film)  $\nu_{\max}$  2983, 1766, 1615  $\text{cm}^{-1}$ . MS (EI):  $m/z$  (%) 200 ( $\text{M}^+$ ), 193, 172, 155 (100). HRMS calcd. for  $\text{C}_{10}\text{H}_{10}\text{O}_2\text{F}_2$  ( $\text{M}^+$ ): 200.0649; Found: 200.0652.

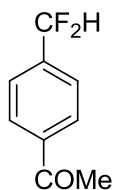

**1-(4-(Difluoromethyl)phenyl)ethanone (23).** The product (28 mg, 55% yield) as a colorless oil was purified with silica gel chromatography (Petroleum ether/EtOAc = 10:1). This compound is known.<sup>7</sup> <sup>1</sup>H NMR (300 MHz, CDCl<sub>3</sub>) δ 8.02 (d, *J* = 8.1 Hz, 2 H), 7.59 (d, *J* = 8.1 Hz, 2 H), 6.68 (t, *J* = 56.1 Hz, 1 H), 2.62 (s, 3 H). <sup>19</sup>F NMR (282 MHz, CDCl<sub>3</sub>) δ -112.7 (d, *J* = 56.1 Hz, 2 F). <sup>13</sup>C NMR (100 MHz, CDCl<sub>3</sub>) δ 197.4, 138.8, 138.5 (t, *J* = 22.1 Hz), 128.6, 125.9 (t, *J* = 6.0 Hz), 113.9 (t, *J* = 238.2 Hz), 26.8. IR (thin film) ν<sub>max</sub> 3064, 2967, 1767, 1689 cm<sup>-1</sup>. MS (EI): *m/z* (%) 170 (M<sup>+</sup>), 155 (100). HRMS calcd. for C<sub>9</sub>H<sub>8</sub>OF<sub>2</sub> (M<sup>+</sup>): 170.0543; Found: 170.0542.

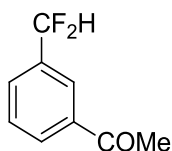

**1-(3-(Difluoromethyl)phenyl)ethanone (24).** The product (37 mg, 73% yield) was purified with silica gel chromatography (Petroleum ether/EtOAc = 8:1). <sup>1</sup>H NMR (400 MHz, CDCl<sub>3</sub>) δ 8.08 (s, 1 H), 8.04 (d, *J* = 7.6 Hz, 1 H), 7.69 (d, *J* = 7.6 Hz, 1 H), 7.55 (t, *J* = 7.6 Hz, 1 H), 6.68 (t, *J* = 56.0 Hz, 1 H), 2.61 (s, 3 H). <sup>19</sup>F NMR (376 MHz, CDCl<sub>3</sub>) δ -111.2 (d, *J* = 56.0 Hz, 2 F). <sup>13</sup>C NMR (100 MHz, CDCl<sub>3</sub>) δ 197.1, 137.5, 134.9 (t, *J* = 22.8 Hz), 130.5, 129.9 (t, *J* = 5.8 Hz), 129.2, 125.5 (t, *J* = 6.3 Hz), 114.1 (t, *J* = 238.0 Hz), 26.7. MS (EI): *m/z* (%) 170 (M<sup>+</sup>), 155 (100). HRMS calcd. for C<sub>9</sub>H<sub>8</sub>OF<sub>2</sub> (M<sup>+</sup>): 170.0543; Found: 170.0542.

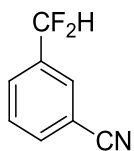

**3-(Difluoromethyl)benzonitrile (25).** The reaction was conducted in 0.6 mmol scale. The product (41 mg, 45% yield) as a colorless oil was purified with silica gel chromatography (Petroleum ether/EtOAc = 10:1). This compound is known.<sup>8</sup> <sup>1</sup>H NMR (400 MHz, CDCl<sub>3</sub>) δ 7.81 (s, 1 H), 7.77 (t, *J* = 8.0 Hz, 2 H), 7.60 (t, *J* = 8.0 Hz, 1 H), 6.68 (t, *J* = 56.1 Hz, 1 H). <sup>19</sup>F NMR (376 MHz, CDCl<sub>3</sub>) δ -112.8 (d, *J* = 56.1 Hz, 2 F). <sup>13</sup>C NMR (125.7 MHz, CDCl<sub>3</sub>) δ 134.2 (t, *J* = 1.5 Hz), 129.9 (t, *J* = 5.9 Hz), 129.8, 129.3



(t,  $J = 6.2$  Hz), 117.8 (t,  $J = 12.7$  Hz), 113.2, 113.1 (t,  $J = 240.3$  Hz), 109.9. IR (thin film)  $\nu_{\max}$  2924, 2234, 1766  $\text{cm}^{-1}$ . MS (EI):  $m/z$  (%) 153 ( $\text{M}^+$ ), 152 (100). HRMS calcd. for  $\text{C}_8\text{H}_5\text{NF}_2$  ( $\text{M}^+$ ): 153.0390; Found: 153.0388.

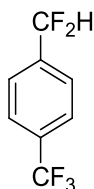

**1-(Difluoromethyl)-4-(trifluoromethyl)benzene (26).** Due to the low boiling point of the product, the yield (84%) was determined by  $^{19}\text{F}$  NMR using fluorobenzene as an internal standard. This compound is known.<sup>6</sup> The product was characterized by  $^{19}\text{F}$  NMR and GC-MS analysis.

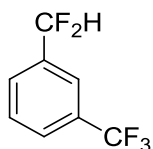

**1-(Difluoromethyl)-3-(trifluoromethyl)benzene (27).** Due to the low boiling point of the product, the yield (78% yield) was determined by  $^{19}\text{F}$  NMR using fluorobenzene as an internal standard. The product was characterized by  $^{19}\text{F}$  NMR and GC-MS analysis.

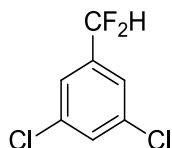

**1,3-dichloro-5-(difluoromethyl)benzene (28).** The product (26 mg, 43% yield;  $^{19}\text{F}$  NMR yield 54%) was purified with silica gel chromatography (Petroleum ether). This compound is known.<sup>9</sup>  $^1\text{H}$  NMR (300 MHz,  $\text{CDCl}_3$ )  $\delta$  7.46 (m, 1 H), 7.39 (s, 2 H), 6.58 (t,  $J = 56.1$  Hz, 1 H).  $^{19}\text{F}$  NMR (282 MHz,  $\text{CDCl}_3$ )  $\delta$  -112.7 (d,  $J = 56.1$  Hz, 2 F). MS (EI):  $m/z$  (%) 195 ( $\text{M}^+$ ), 186, 177, 161 (100). HRMS calcd. for  $\text{C}_7\text{H}_4\text{Cl}_2\text{F}_2$  ( $\text{M}^+$ ): 195.9658; Found: 195.9653.

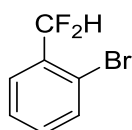

**1-Bromo-2-(difluoromethyl)benzene (29).** The product (20 mg, 33% yield;  $^{19}\text{F}$  NMR yield 38%) as a colorless oil was purified with silica gel chromatography (Petroleum ether). This compound is known. $^{10}$   $^1\text{H}$  NMR (400 MHz,  $\text{CDCl}_3$ )  $\delta$  7.66 (d,  $J = 7.6$  Hz, 1 H), 7.62-7.60 (m, 1 H), 7.43 (t,  $J = 7.6$  Hz, 1 H), 7.34 (t,  $J = 7.6$  Hz, 1 H), 6.92 (t,  $J = 54.8$  Hz, 1 H).  $^{19}\text{F}$  NMR (375 MHz,  $\text{CDCl}_3$ )  $\delta$  -114.6 (d,  $J = 54.8$  Hz, 2 F). MS (EI):  $m/z$  (%) 206 ( $\text{M}^+$ ), 206 (100). HRMS calcd. for  $\text{C}_7\text{H}_5\text{BrF}_2$  ( $\text{M}^+$ ): 205.9543; Found: 205.9540.

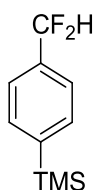

**(4-(Difluoromethyl)phenyl)trimethylsilane (30).** The product (43 mg, 72% yield) was purified with silica gel chromatography (Petroleum ether/EtOAc = 30:1). This compound is known. $^6$   $^1\text{H}$  NMR (300 MHz,  $\text{CDCl}_3$ )  $\delta$  7.62 (d,  $J = 7.5$  Hz, 2 H), 7.49 (d,  $J = 7.5$  Hz, 2 H), 6.64 (t,  $J = 56.7$  Hz, 1 H), 0.3 (s, 9 H).  $^{19}\text{F}$  NMR (282 MHz,  $\text{CDCl}_3$ )  $\delta$  -111.2 (d,  $J = 56.7$  Hz, 2 F).  $^{13}\text{C}$  NMR (125.7 MHz,  $\text{CDCl}_3$ )  $\delta$  143.9, 134.6 (t,  $J = 22.2$  Hz), 133.6, 124.7 (t,  $J = 6.0$  Hz), 114.8 (t,  $J = 238.5$  Hz), -1.3. MS (EI):  $m/z$  (%) 200 ( $\text{M}^+$ ), 185 (100). HRMS calcd. for  $\text{C}_{10}\text{H}_{14}\text{SiF}_2$  ( $\text{M}^+$ ): 200.0833; Found: 200.0838.

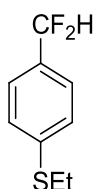

**(4-(Difluoromethyl)phenyl)(ethyl)sulfane (31).** The product (49 mg, 87% yield) was purified with silica gel chromatography (Petroleum ether/EtOAc = 30:1).  $^1\text{H}$  NMR (300 MHz,  $\text{CDCl}_3$ )  $\delta$  7.41 (d,  $J = 8.4$  Hz, 2 H), 7.35 (d,  $J = 8.4$  Hz, 2 H), 6.61 (t,  $J = 56.7$  Hz, 1 H), 2.98 (q,  $J = 7.5$  Hz, 2 H), 1.35 (t,  $J = 7.5$  Hz, 3 H).  $^{19}\text{F}$  NMR (282 MHz,  $\text{CDCl}_3$ )  $\delta$  -110.5 (d,  $J = 56.7$  Hz, 2 F).  $^{13}\text{C}$  NMR (125.7 MHz,  $\text{CDCl}_3$ )  $\delta$  140.7 (t,  $J = 2.0$  Hz), 131.3 (t,  $J = 22.4$  Hz), 127.8, 125.9 (t,  $J = 5.9$  Hz), 114.6 (t,  $J = 238.3$  Hz), 26.8, 14.1. MS (EI):  $m/z$  (%) 188 ( $\text{M}^+$ ), 160 (100). HRMS calcd. for  $\text{C}_9\text{H}_{10}\text{SF}_2$  ( $\text{M}^+$ ): 188.0471; Found: 188.0469.

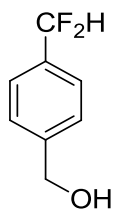

**4-(Difluoromethyl)phenylmethanol (32).** The product (36 mg, 76% yield) as a colorless oil was purified with silica gel chromatography (Petroleum ether/EtOAc = 3:1). This compound is known.<sup>11</sup> <sup>1</sup>H NMR (400 MHz, CDCl<sub>3</sub>) δ 7.51 (d, *J* = 8.4 Hz, 2 H), 7.45 (d, *J* = 8.4 Hz, 2 H), 6.65 (t, *J* = 56.4 Hz, 1 H), 4.76 (s, 2 H), 1.76 s, 1 H). <sup>19</sup>F NMR (376 MHz, CDCl<sub>3</sub>) δ -110.4 (d, *J* = 56.4 Hz, 2 F). MS (EI): *m/z* (%) 158 (M<sup>+</sup>), 127, 107 (100). IR (thin film) ν<sub>max</sub> 3332, 1759, 1620, 1508 cm<sup>-1</sup>. HRMS calcd. for C<sub>8</sub>H<sub>8</sub>OF<sub>2</sub> (M<sup>+</sup>):158.0543; Found: 158.0540.

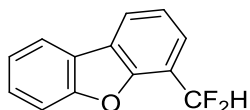

**4-(Difluoromethyl)dibenzo[*b,d*]furan (33).** The product (50 mg, 77% yield) as a colorless oil was purified with silica gel chromatography (Petroleum ether). <sup>1</sup>H NMR (400 MHz, CDCl<sub>3</sub>) δ 8.02 (dd, *J* = 7.6 Hz, *J* = 0.8 Hz, 1 H), 7.94 (d, *J* = 7.6 Hz, 1 H), 7.67 (d, *J* = 7.6 Hz, 1 H), 7.62 (d, *J* = 8.4 Hz, 1 H), 7.50 (td, *J* = 8.4 Hz, *J* = 1.2 Hz, 1 H), 7.41 (t, *J* = 8.0 Hz, 1 H), 7.38 (t, *J* = 8.0 Hz, 1 H), 7.23 (t, *J* = 55.2 Hz, 1 H). <sup>19</sup>F NMR (376 MHz, CDCl<sub>3</sub>) δ -113.0 (d, *J* = 55.2 Hz, 2 F). <sup>13</sup>C NMR (125.7 MHz, CDCl<sub>3</sub>) δ 156.3, 127.8, 125.1, 123.7 (t, *J* = 5.8 Hz), 123.4, 123.2, 123.1 (t, *J* = 1.6 Hz), 122.7, 120.8, 118.5 (t, *J* = 24.0 Hz), 111.9, 111.8 (t, *J* = 237.4 Hz). MS (EI): *m/z* (%) 218 (M<sup>+</sup>), 218 (100). HRMS calcd. for C<sub>13</sub>H<sub>8</sub>OF<sub>2</sub> (M<sup>+</sup>): 218.0543; Found: 218.0538.

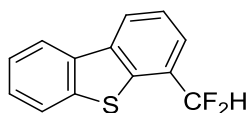

**4-(Difluoromethyl)dibenzo[*b,d*]thiophene (34).** The product (55 mg, 79% yield) as a colorless oil was purified with silica gel chromatography (Petroleum ether). <sup>1</sup>H NMR (300 MHz, CDCl<sub>3</sub>) δ 8.23-8.20 (m, 1 H), 8.17-8.14 (m, 1 H), 7.89-7.86 (m, 1 H), 7.63-7.60 (m, 1 H), 7.53-7.47 (m, 3 H), 6.93 (t, *J* = 55.4 Hz, 1 H). <sup>19</sup>F NMR (282 MHz, CDCl<sub>3</sub>) δ -113.7 (d, *J* = 55.4 Hz, 2 F). <sup>13</sup>C NMR (125.7 MHz, CDCl<sub>3</sub>) δ 139.5 (t, *J* = 1.0 Hz), 136.9, 136.6 (t, *J* = 3.3 Hz), 134.6, 128.5 (t, *J* = 22.8 Hz), 127.3, 124.7, 124.4, 124.3 (t, *J* = 7.0 Hz), 123.7 (t, *J* = 1.8 Hz), 122.7, 121.7, 114.5 (t, *J* = 239.4 Hz). MS (EI): *m/z*

(%) 234 ( $M^+$ ), 234 (100). HRMS calcd. for  $C_{13}H_8SF_2$  ( $M^+$ ): 234.0315; Found: 234.0320. IR (thin film)  $\nu_{\max}$  3067, 2963, 1457  $cm^{-1}$ .

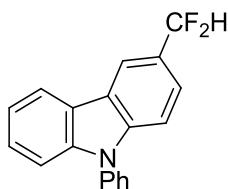

**3-(Difluoromethyl)-9-phenyl-9H-carbazole (35).** The product (49 mg, 56% yield) as a colorless oil was purified with silica gel chromatography (Petroleum ether).  $^1H$  NMR (400 MHz,  $CDCl_3$ )  $\delta$  8.32 (s, 1 H), 8.18 (d,  $J = 8.0$  Hz, 1 H), 7.64 (t,  $J = 6.8$  Hz, 2 H), 7.57-7.55 (m, 3 H), 7.52-7.42 (m, 4 H), 7.35 (t,  $J = 7.2$  Hz, 1 H), 6.88 (t,  $J = 56.8$  Hz, 1 H).  $^{19}F$  NMR (376 MHz,  $CDCl_3$ )  $\delta$  -106.3 (d,  $J = 56.8$  Hz, 2 F).  $^{13}C$  NMR (125.7 MHz,  $CDCl_3$ )  $\delta$  142.0, 141.5, 137.2, 130.0, 127.9, 127.2, 126.6, 126.1 (t,  $J = 22.4$  Hz), 123.2 (t,  $J = 5.7$  Hz), 123.1, 122.9, 120.49, 120.48, 118.1 (t,  $J = 6.4$  Hz), 115.8 (t,  $J = 237.3$  Hz), 110.1, 109.9. MS (EI):  $m/z$  (%) 292 ( $M^+ - H$ ), 271 (100). HRMS calcd. for  $C_{19}H_{13}NF_2$  ( $M^+$ ): 293.1016; Found: 293.1017. IR (thin film)  $\nu_{\max}$  3062, 1761, 1686  $cm^{-1}$ .

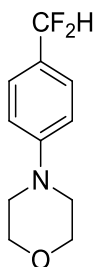

**4-(4-(Difluoromethyl)phenyl)morpholine (36).** The product (40 mg, 62% yield) as a colorless oil was purified with silica gel chromatography (Petroleum ether/EtOAc = 3:1).  $^1H$  NMR (400 MHz,  $CDCl_3$ )  $\delta$  7.41 (d,  $J = 8.8$  Hz, 2 H), 6.93 (d,  $J = 8.8$  Hz, 2 H), 6.58 (t,  $J = 57.2$  Hz, 1 H), 3.87 (t,  $J = 4.8$  Hz, 4 H), 3.21 (t,  $J = 4.8$  Hz, 4 H).  $^{19}F$  NMR (375 MHz,  $CDCl_3$ )  $\delta$  -108.1 (d,  $J = 57.2$  Hz, 2 F).  $^{13}C$  NMR (125.7 MHz,  $CDCl_3$ )  $\delta$  152.9 (t,  $J = 1.5$  Hz), 126.7 (t,  $J = 5.9$  Hz), 125.3 (t,  $J = 22.9$  Hz), 115.1 (t,  $J = 236.8$  Hz), 114.8, 66.7, 48.5. MS (EI):  $m/z$  (%) 213 ( $M^+$ ), 206, 191 (100). HRMS calcd. for  $C_{11}H_{13}NOF_2$  ( $M^+$ ): 213.0965; Found: 213.0970. IR (thin film)  $\nu_{\max}$  2963, 2853, 1686, 1600  $cm^{-1}$ .

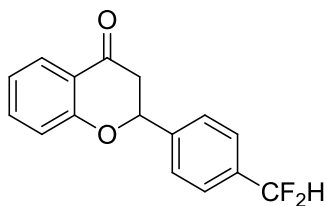

**(2-(4-(Difluoromethyl)phenyl)chroman-4-one (37).** The product (63 mg, 76% yield) as a white solid (m.p. 61-63 °C) was purified with silica gel chromatography (Petroleum ether/EtOAc = 3:1).  $^1\text{H}$  NMR (400 MHz,  $\text{CDCl}_3$ )  $\delta$  7.93 (dd,  $J = 8.4$  Hz,  $J = 0.8$  Hz, 1 H), 7.59 (s, 4 H), 7.52 (td,  $J = 8.4$  Hz,  $J = 1.6$  Hz, 1 H), 7.08-7.05 (m, 2 H), 6.67 (t,  $J = 56.4$  Hz, 1 H), 5.53 (dd,  $J = 12.8$  Hz,  $J = 2.8$  Hz, 1 H), 3.06 (dd,  $J = 16.8$  Hz,  $J = 13.2$  Hz, 1 H), 2.90 (dd,  $J = 16.8$  Hz,  $J = 2.8$  Hz, 1 H).  $^{19}\text{F}$  NMR (376 MHz,  $\text{CDCl}_3$ )  $\delta$  -110.9 (d,  $J = 56.4$  Hz, 2 F).  $^{13}\text{C}$  NMR (125.7 MHz,  $\text{CDCl}_3$ )  $\delta$  191.4, 161.3, 141.5 (t,  $J = 1.9$  Hz), 136.3, 134.7 (t,  $J = 22.6$  Hz), 127.1, 126.4, 126.1 (t,  $J = 6.2$  Hz), 121.9, 120.9, 118.1, 114.4 (t,  $J = 238.8$  Hz), 79.0, 44.6. IR (thin film)  $\nu_{\text{max}}$  3066, 1763, 1690, 1606  $\text{cm}^{-1}$ . MS (EI):  $m/z$  (%) 274 ( $\text{M}^+$ ), 147, 120 (100). HRMS calcd. for  $\text{C}_{16}\text{H}_{12}\text{O}_2\text{F}_2$ : 274.0805; Found: 274.0806.

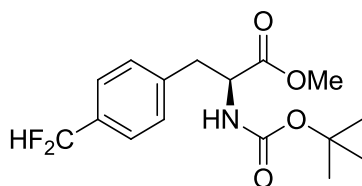

**(S)-Methyl 2-((tert-butoxycarbonyl)amino)-3-(4-(difluoromethyl)phenyl)propanoate (38).** The product (60 mg, 61% yield) as a white solid (m.p. 70-73 °C) was purified with silica gel chromatography (Petroleum ether/EtOAc = 3:1).  $^1\text{H}$  NMR (400 MHz,  $\text{CDCl}_3$ )  $\delta$  7.42 (d,  $J = 8.0$  Hz, 2 H), 7.21 (d,  $J = 8.0$  Hz, 2 H), 6.61 (t,  $J = 56.4$  Hz, 1 H), 5.01 (d,  $J = 6.8$  Hz, 1 H), 4.61 (dd,  $J = 13.2$  Hz,  $J = 6.4$  Hz, 1 H), 3.71 (s, 3 H), 3.17 (dd,  $J = 13.6$  Hz,  $J = 5.6$  Hz, 1 H), 3.06 (dd,  $J = 13.6$  Hz,  $J = 5.6$  Hz, 1 H), 1.40 (s, 9 H).  $^{19}\text{F}$  NMR (376 MHz,  $\text{CDCl}_3$ )  $\delta$  -110.5 (d,  $J = 56.4$  Hz, 2 F).  $^{13}\text{C}$  NMR (100 MHz,  $\text{CDCl}_3$ )  $\delta$  172.1, 155.0, 139.0 (t,  $J = 2.0$  Hz), 133.2 (t,  $J = 22.1$  Hz), 129.7, 125.8 (t,  $J = 5.9$  Hz), 114.6 (t,  $J = 237.1$  Hz), 80.1, 54.3, 52.3, 38.2, 28.3. IR (thin film)  $\nu_{\text{max}}$  3372, 2978, 1748, 1714, 1508  $\text{cm}^{-1}$ . MS (EI):  $m/z$  (%) 328 ( $\text{M}^+ - \text{H}$ ), 212, 88, 57 (100). HRMS calcd. for  $\text{C}_{16}\text{H}_{21}\text{NO}_4\text{F}_2$ : 329.1439; Found: 329.1436.

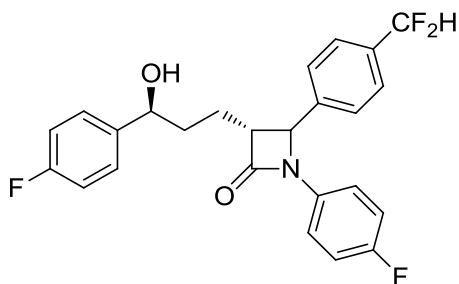

**(3R)-4-(4-(Difluoromethyl)phenyl)-1-(4-fluorophenyl)-3-((S)-3-(4-fluorophenyl)-3-hydroxypropyl)azetidin-2-one (39).** The product (77 mg, 58% yield) as a white solid (m.p. 141-146 °C) was purified with silica gel chromatography (Petroleum ether/EtOAc = 3:1). <sup>1</sup>H NMR (400 MHz, CDCl<sub>3</sub>) δ 7.52 (d, *J* = 7.6 Hz, 2 H), 7.41 (d, *J* = 7.6 Hz, 2 H), 7.31-7.28 (m, 2 H), 7.23-7.19 (m, 2 H), 7.02 (t, *J* = 8.4 Hz, 2 H), 6.94 (t, *J* = 8.4 Hz, 2 H), 6.64 (t, *J* = 56.4 Hz, 1 H), 4.72 (m, 1 H), 4.67 (d, *J* = 2.4 Hz, 1 H), 3.08 (td, *J* = 6.8 Hz, *J* = 2.4 Hz, 1 H), 2.11 (d, *J* = 3.6 Hz, 1 H), 2.04-1.90 (m, 4 H). <sup>19</sup>F NMR (376 MHz, CDCl<sub>3</sub>) δ -110.9 (d, *J* = 56.4 Hz, 2 F), -114.7 (m, 1 F), -117.6 (m, 1 F). <sup>13</sup>C NMR (100 MHz, CDCl<sub>3</sub>) δ 167.0, 162.2 (d, *J* = 244.3 Hz), 159.1 (d, *J* = 242.5 Hz), 140.4 (t, *J* = 2.0 Hz), 139.9 (d, *J* = 3.1 Hz), 134.8 (t, *J* = 22.5 Hz), 133.6 (d, *J* = 2.3 Hz), 127.3 (d, *J* = 8.0 Hz), 126.6 (t, *J* = 6.0 Hz), 126.2, 118.3 (d, *J* = 7.8 Hz), 115.9 (d, *J* = 22.8 Hz), 115.4 (d, *J* = 20.1 Hz), 114.2 (t, *J* = 237.7 Hz), 73.2, 60.9, 60.5, 36.6, 25.1. IR (thin film) ν<sub>max</sub> 3432, 2928, 1739, 1714, 1507 cm<sup>-1</sup>. MS (EI): *m/z* (%) 443 (M<sup>+</sup>), 333, 292, 250 (100). HRMS calcd. for C<sub>25</sub>H<sub>21</sub>NO<sub>2</sub>F<sub>4</sub>: 443.1508; Found: 443.1512.

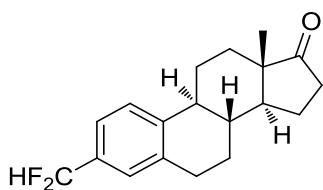

**(8R,9S,13S,14S)-3-(Difluoromethyl)-13-methyl-7,8,9,11,12,13,15,16-octahydro-6H-cyclopenta[a]phenanthren-17(14H)-one (40).** The product (69 mg, 76% yield) as a white solid (m.p. 59-62 °C) was purified with silica gel chromatography (Petroleum ether/EtOAc = 3:1). <sup>1</sup>H NMR (400 MHz, CDCl<sub>3</sub>) δ 7.37 (d, *J* = 8.4 Hz, 1 H), 7.27 (d, *J* = 8.4 Hz, 1 H), 7.24 (s, 1 H), 6.58 (t, *J* = 56.4 Hz, 1 H), 2.97-2.94 (m, 2 H), 2.51 (q, *J* = 8.8 Hz, 1 H), 2.47-2.42 (m, 1 H), 2.32 (t, *J* = 10.0 Hz, 1 H), 2.19-2.12 (m, 1 H), 2.10-2.03 (m, 2 H), 1.99-1.96 (m, 1 H), 1.67-1.42 (m, 6 H), 0.91 (s, 3 H). <sup>19</sup>F NMR (376 MHz, CDCl<sub>3</sub>) δ -109.9 (dd, *J* = 56.4 Hz, *J* = 5.3 Hz, 2 F). <sup>13</sup>C NMR (125.7 MHz, CDCl<sub>3</sub>) δ 220.6, 142.6 (t, *J* = 1.9 Hz), 137.1, 131.9 (t, *J* = 22.4 Hz), 126.1 (t, *J* = 5.9 Hz), 125.7, 122.8 (t, *J* = 16.6 Hz), 114.9 (t, *J* = 237.9 Hz), 50.5, 47.9, 44.4, 37.9, 35.8, 31.5, 29.3, 26.2, 25.6, 21.5, 13.8. IR (thin film)

$\nu_{\max}$  2984, 1734, 1616  $\text{cm}^{-1}$ . MS (EI):  $m/z$  (%) 304 ( $\text{M}^+$ ), 304 (100). HRMS calcd. for  $\text{C}_{19}\text{H}_{22}\text{OF}_2$ : 304.1639; Found: 304.1634.

## References:

- 1) Mehta, V. P. & Greaney, M. F. S-, N-, and Se-Difluoromethylation using sodium chlorodifluoroacetate. *Org. Lett.* **15**, 5036-5039 (2013).
- 2) Grushin, V. V. & Marshall, W. J. Facile Ar- $\text{CF}_3$  Bond Formation at Pd. Strikingly Different Outcomes of Reductive Elimination from  $[(\text{Ph}_3\text{P})_2\text{Pd}(\text{CF}_3)\text{Ph}]$  and  $[(\text{Xantphos})\text{Pd}(\text{CF}_3)\text{Ph}]$ . *J. Am. Chem. Soc.* **128**, 12644-12645 (2006).
- 3) Singh, R.P. & Shreeve, J. M. Concentration-dependent reactions of deoxofluor with arylglyoxal hydrates: a new route to polyfluoro ethers. *Org. Lett.* **3**, 2713-2715 (2001).
- 4) Moulder, J. F.; Stickle, W. F.; Sobol, P. E. & Bomben, K. D. Handbook of X-Ray Photoelectron Spectroscopy: A Reference Book of Standard Spectra for Identification and Interpretation of XPS Data, Perkin-Elmer, Eden Prairie, Minn, USA (1992).
- 5) Fier, P. S. & Hartwig, J. F. Copper-mediated difluoromethylation of aryl and vinyl iodides. *J. Am. Chem. Soc.* **134**, 5524-5527 (2012).
- 6) Ge, S.; Chaladaj, W. & Hartwig, J. F. Pd-catalyzed  $\alpha$ -arylation of  $\alpha$ ,  $\alpha$ -difluoroketones with aryl bromides and chlorides. A route to difluoromethylarenes. *J. Am. Chem. Soc.* **136**, 4149-4152 (2014).
- 7) Prakash, G. K. S.; Ganesh, S. K.; Jones, J.-P.; Kulkarni, A.; Masood, K.; Swabeck, J. K. & Olah, G. A. Copper - Mediated Difluoromethylation of (Hetero) aryl Iodides and  $\beta$ -Styryl Halides with Tributyl (difluoromethyl) stannane. *Angew. Chem., Int. Ed.* **51**, 12090-12094 (2012).
- 8) Fujikawa, K.; Fujioka, Y.; Kobayashi, A. & Amii, H. A new method for aromatic difluoromethylation: copper-catalyzed cross-coupling and decarboxylation sequence from aryl iodides. *Org. Lett.* **13**, 5560-5563 (2011).
- 9) Rowbotham, J. B.; Janzen, A. F.; Peeling, J. & Schaefer, T. Proton Magnetic Resonance Studies of Rotational Isomerism in Halotoluenes. X. Estimates of Conformational Preferences and Rotational Barriers in Benzal Fluoride and Some Dichloro Derivatives. *Can. J. Chem.* **52**, 481-488 (1974).
- 10) Sharma, R.; Halder, S. & Kumar, S. *PCT Int. Appl.* WO 2014170842 (2014).
- 11) Kori, M.; Hamamura, M.; Fuse, H. & Yamamoto, T. *PCT Int. Appl.* WO 2002059077 (2002).

**Compound  $\text{BrCF}_2\text{CO}_2\text{K}$  V (determined from a mixture of V and hydroquinone)**

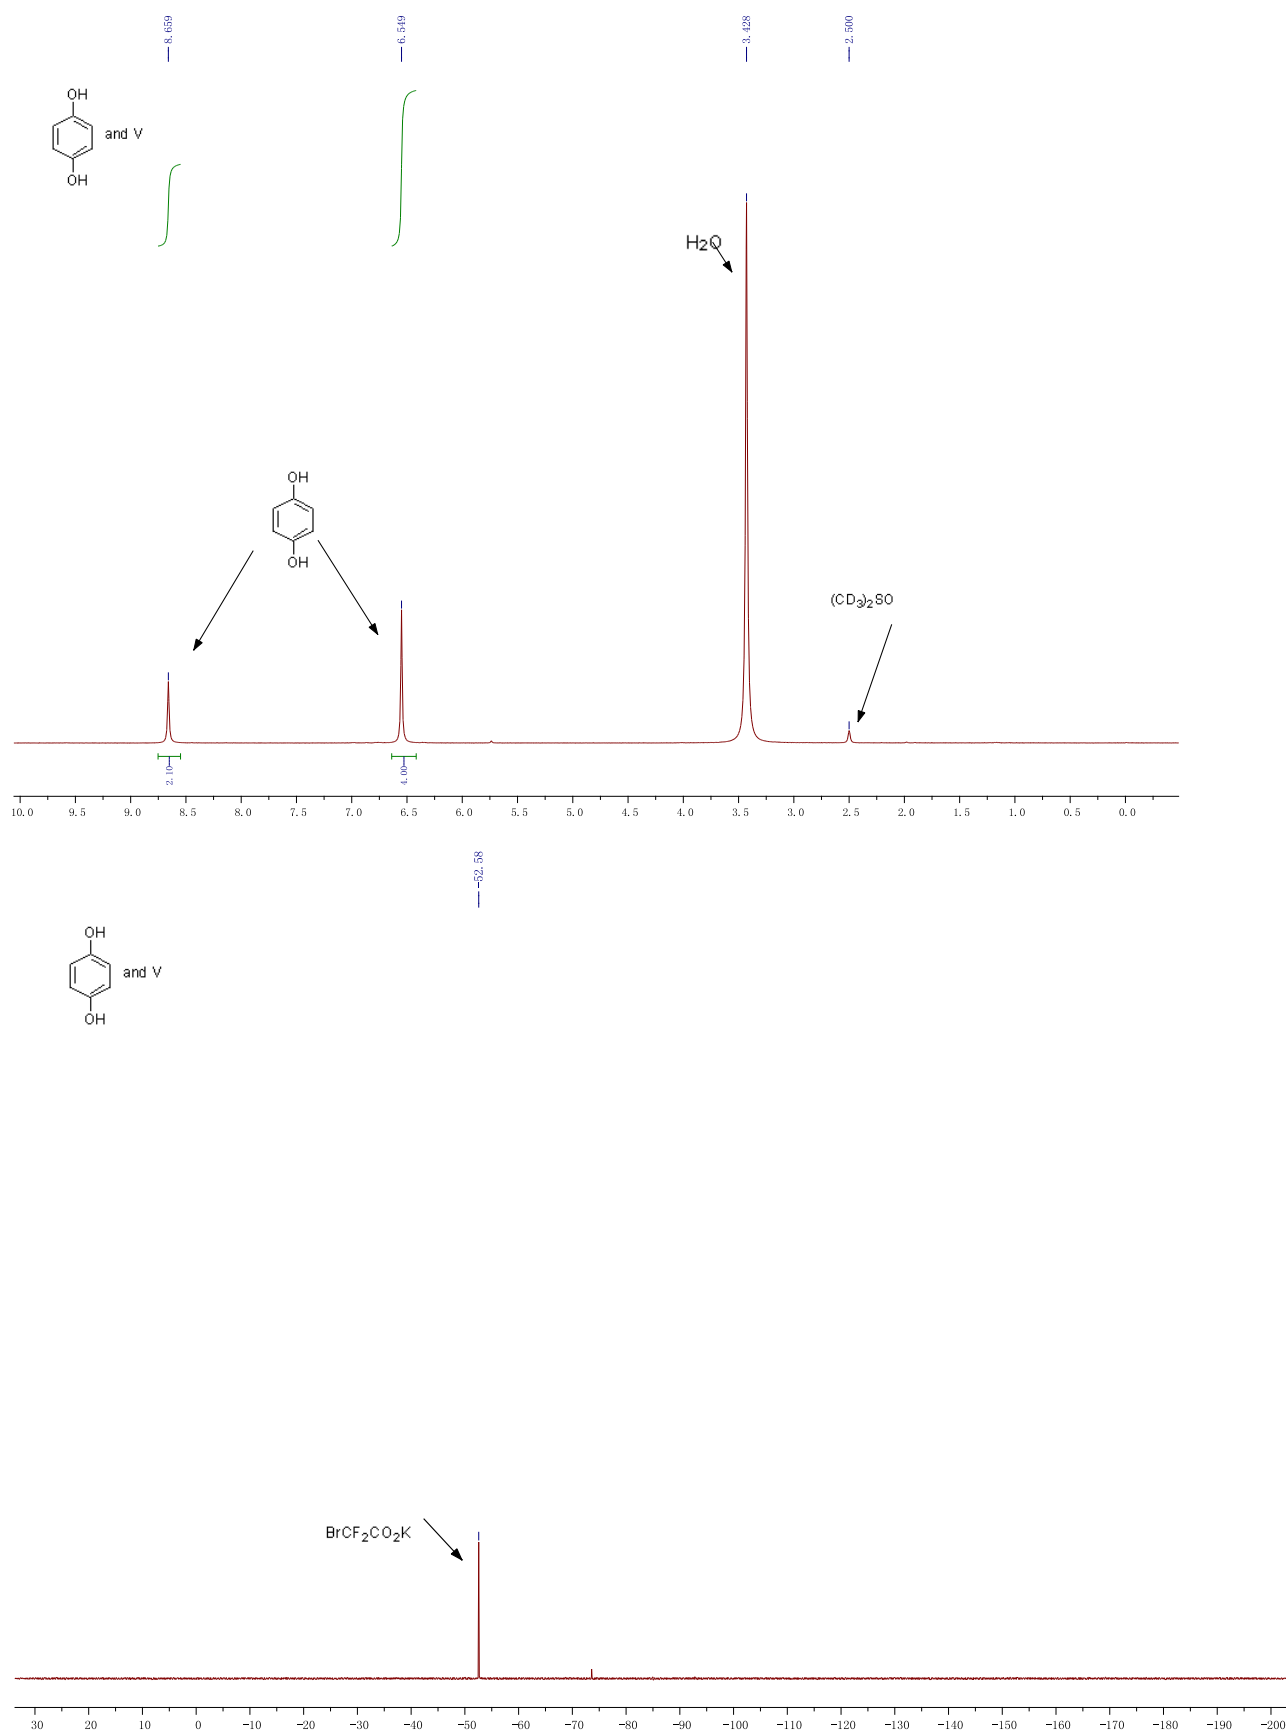



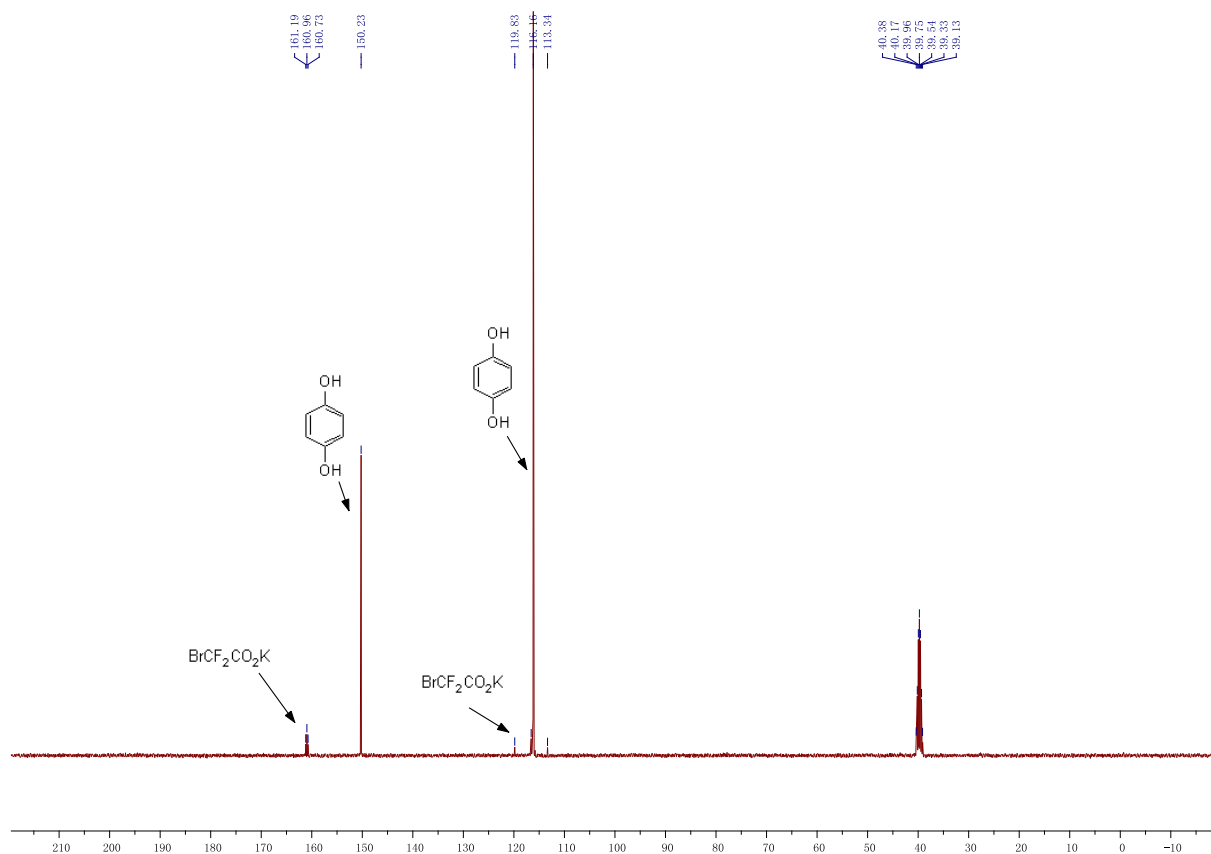

### 4-(1,1,2,2-Tetrafluoroethyl)-1,1'-biphenyl (3a)

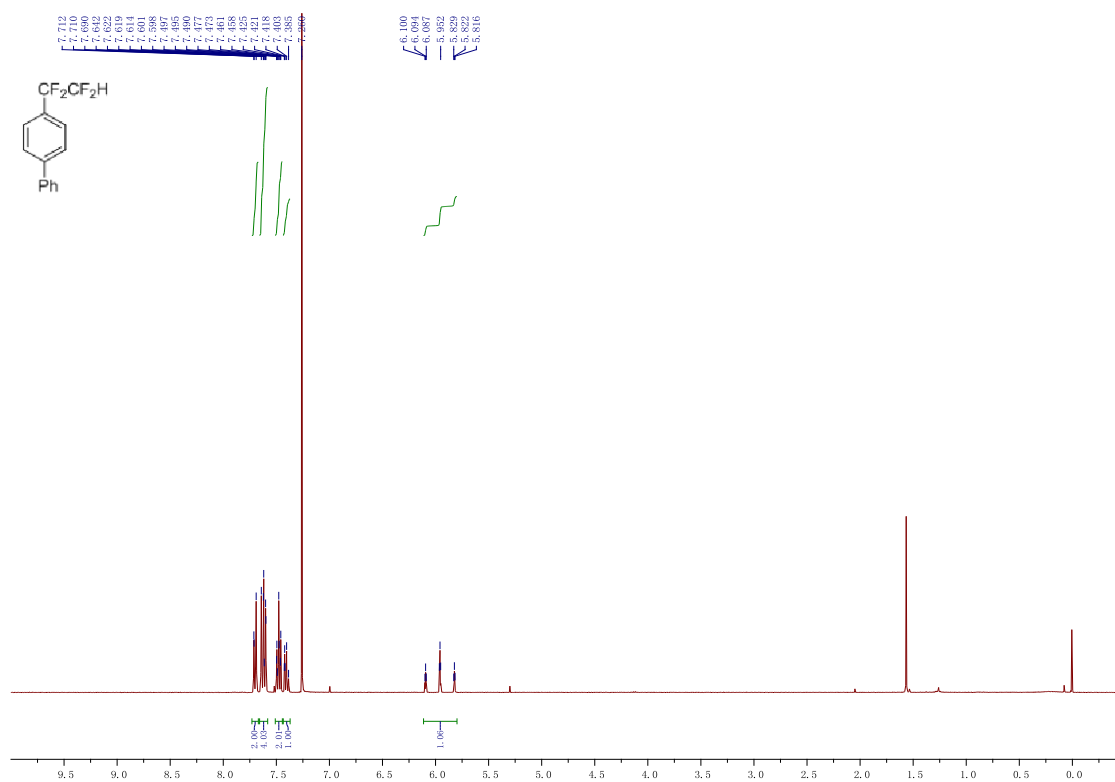

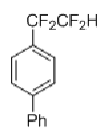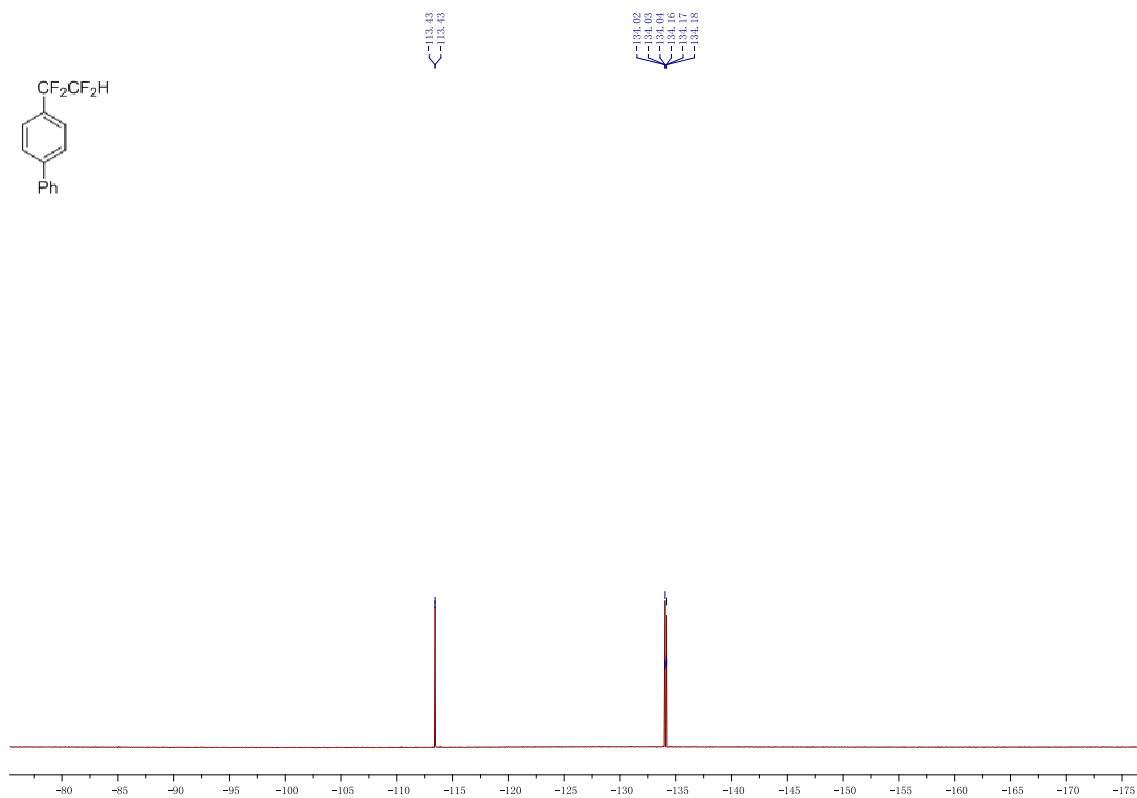

# 4-(Difluoromethyl)-1,1'-biphenyl (3)

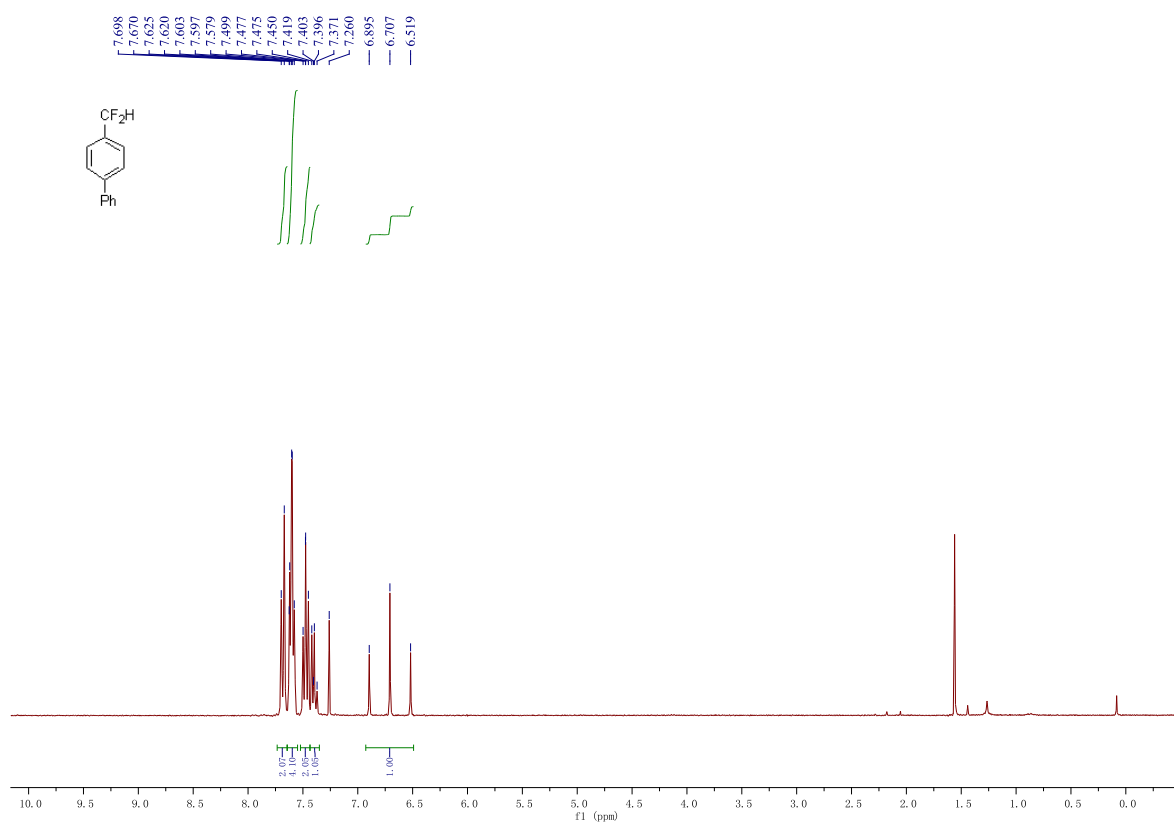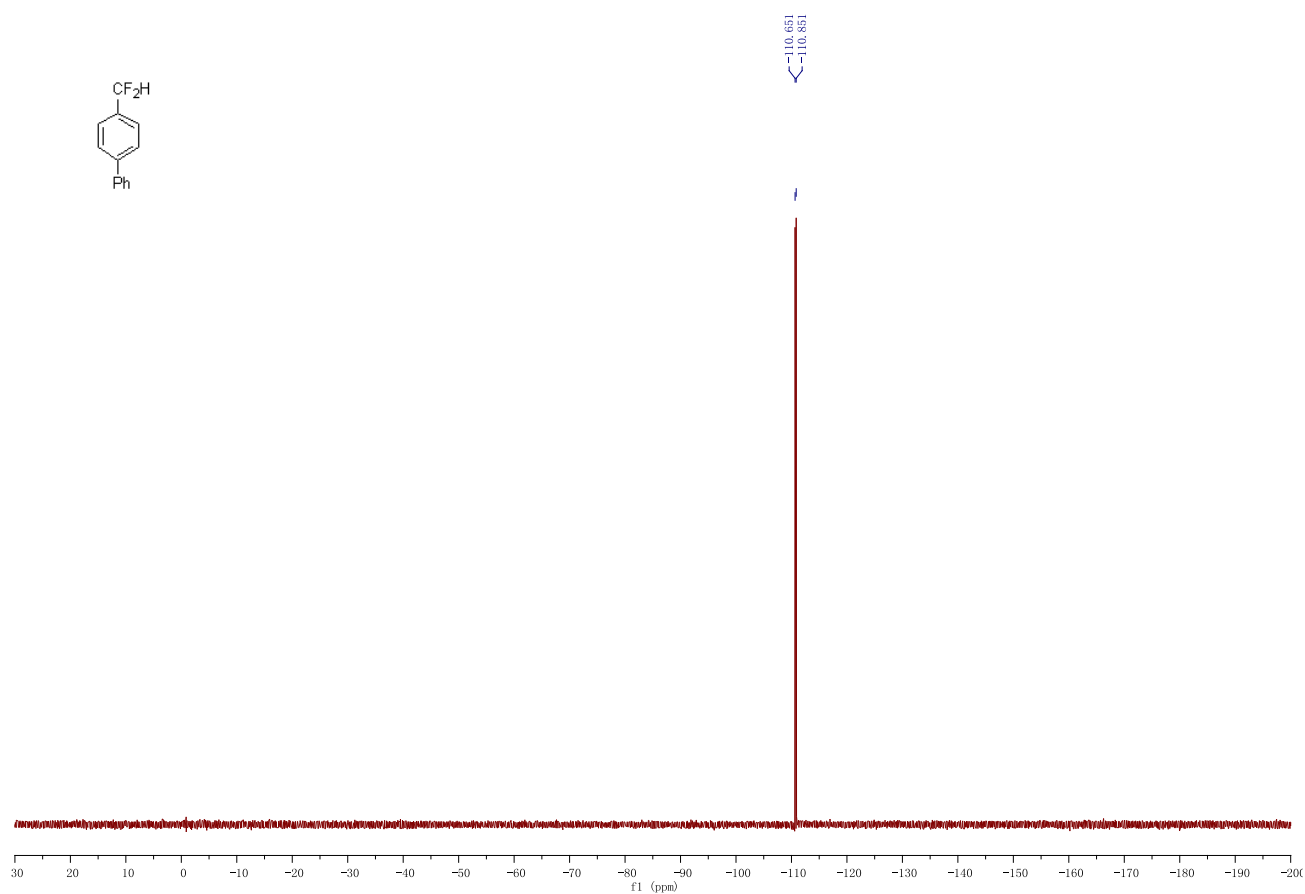

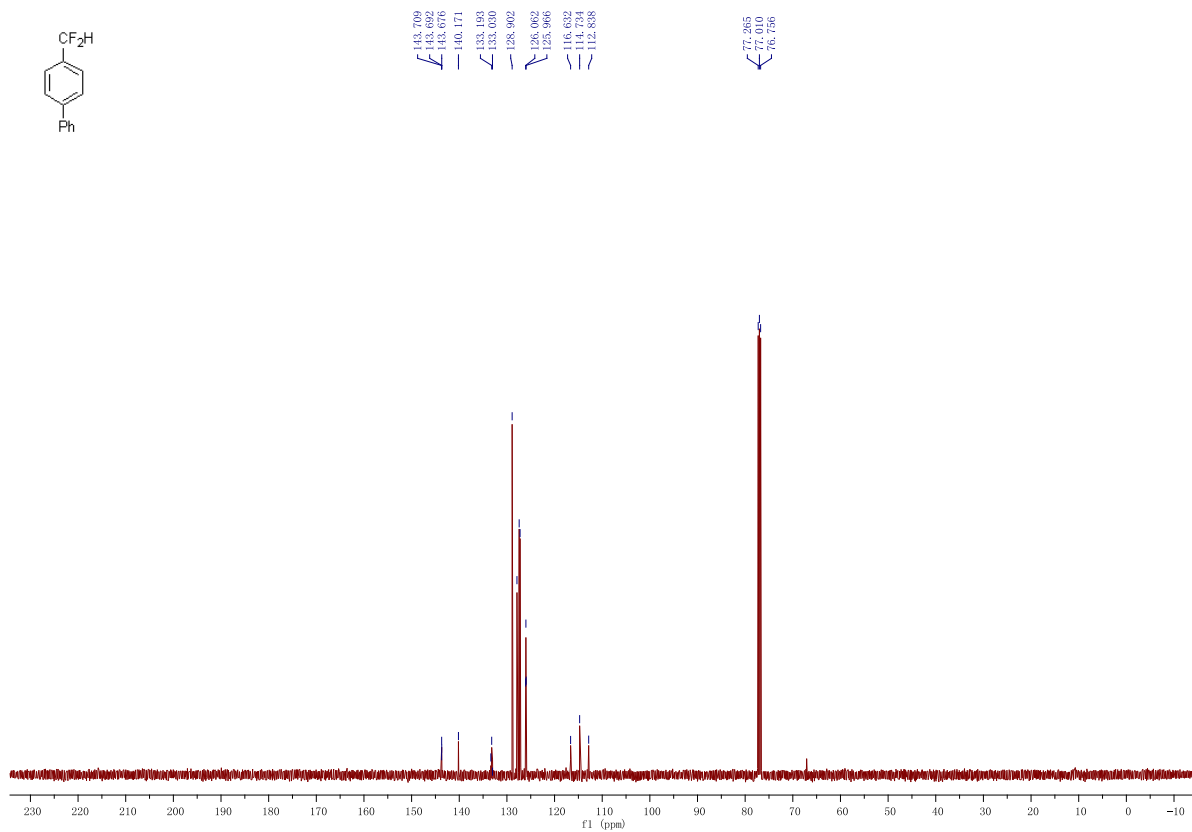

## 2-(Difluoromethyl)-1,1'-biphenyl (5).

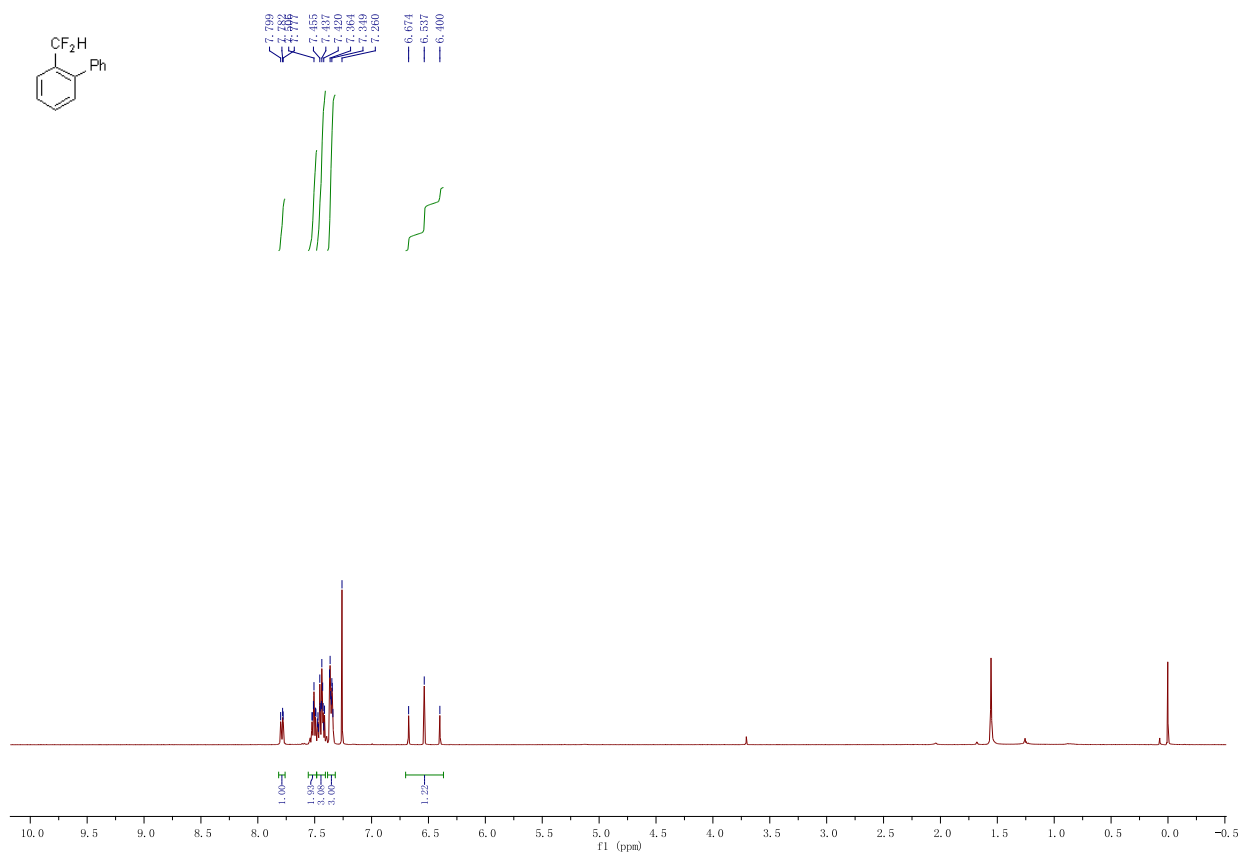

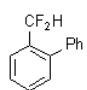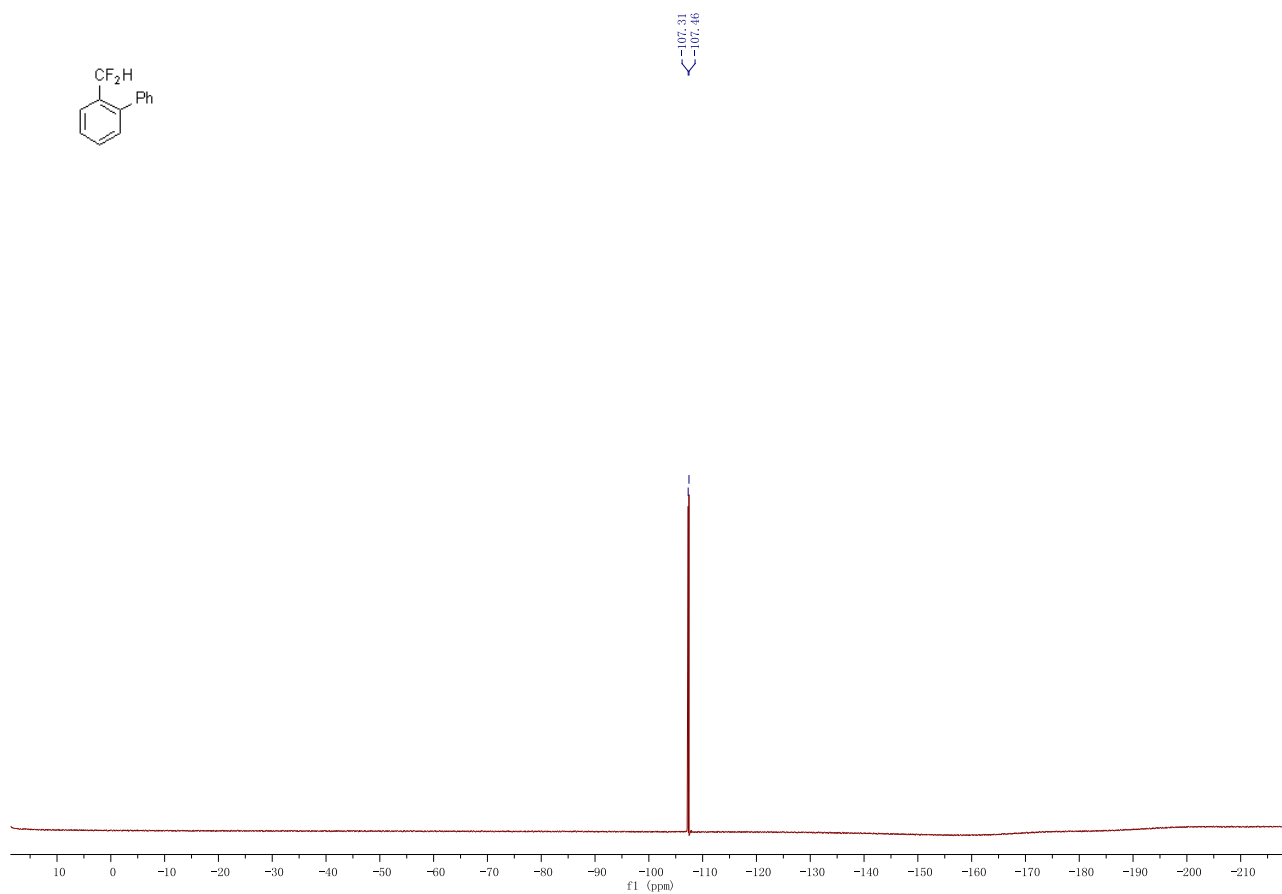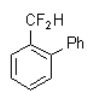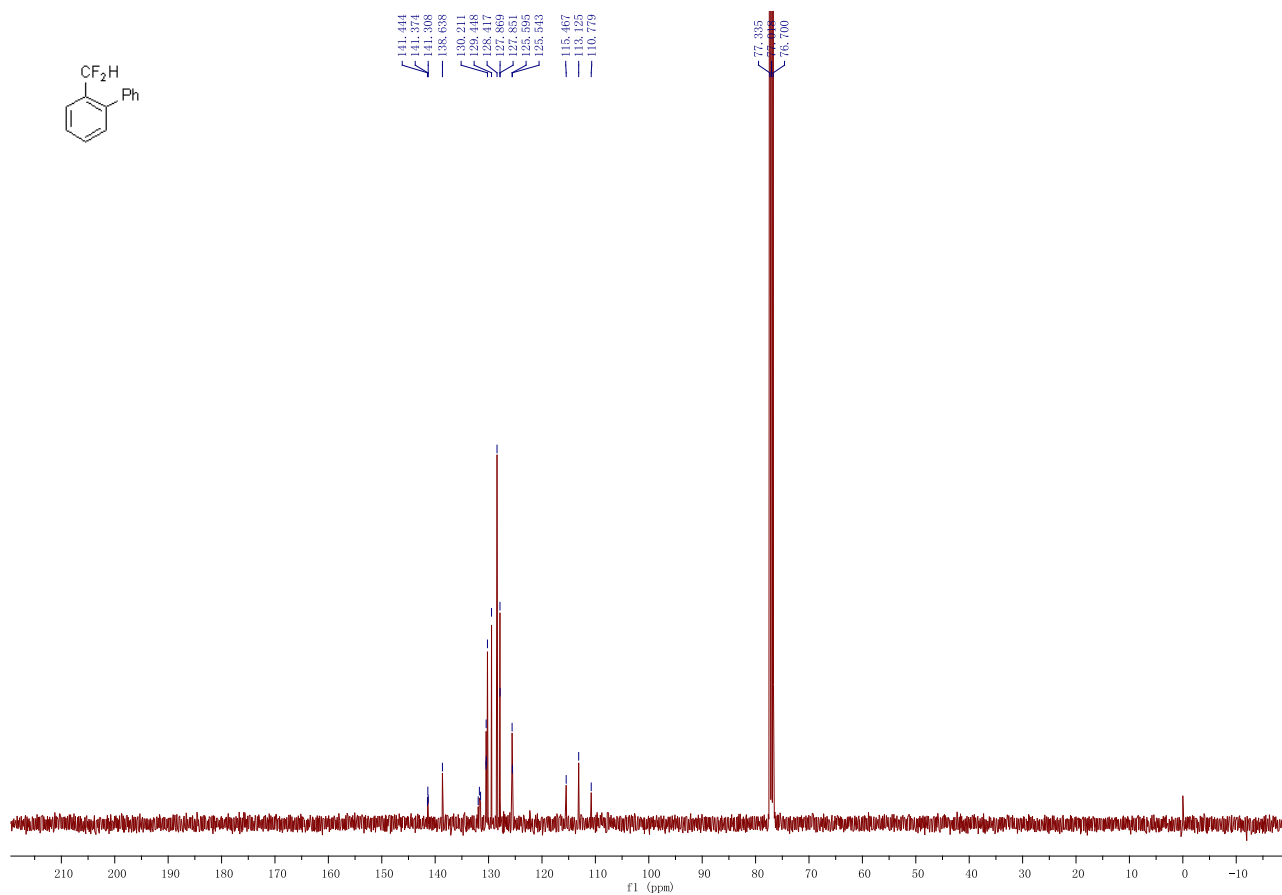

### 3-(Difluoromethyl)-1,1'-biphenyl (6).

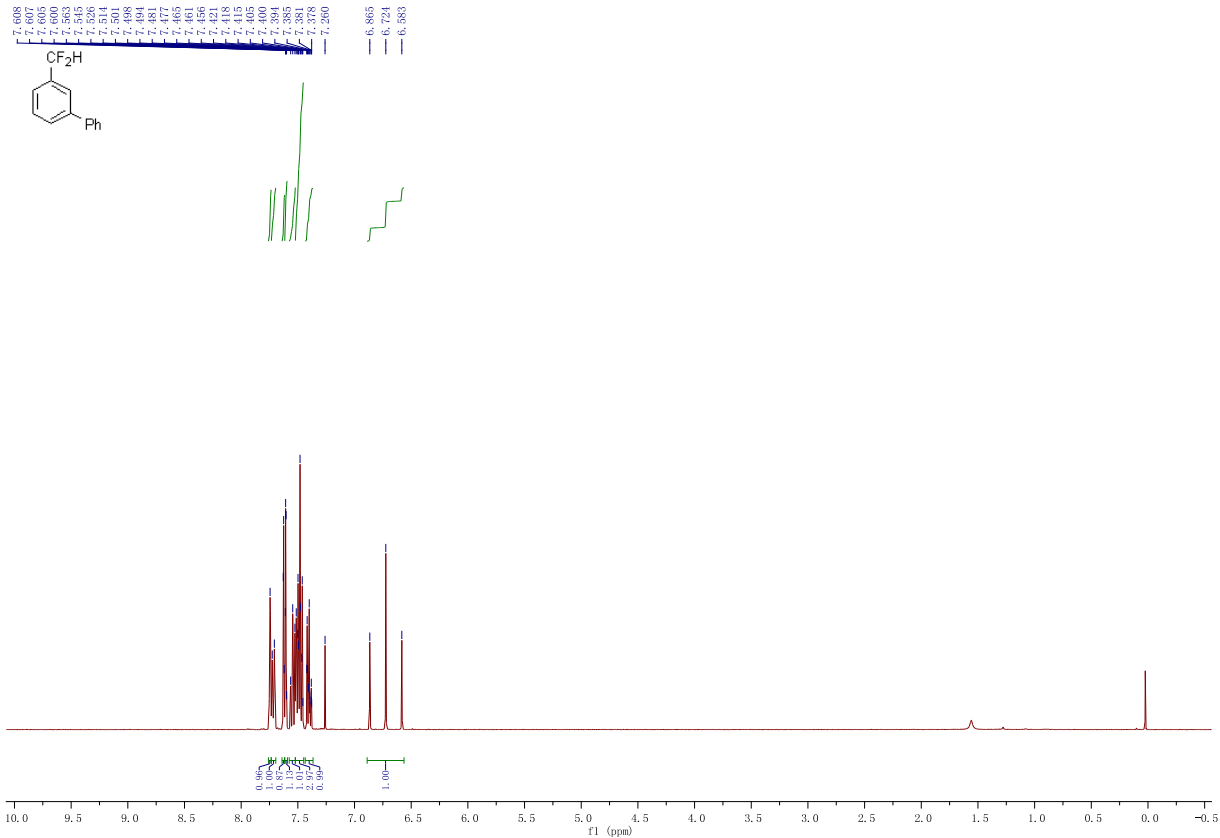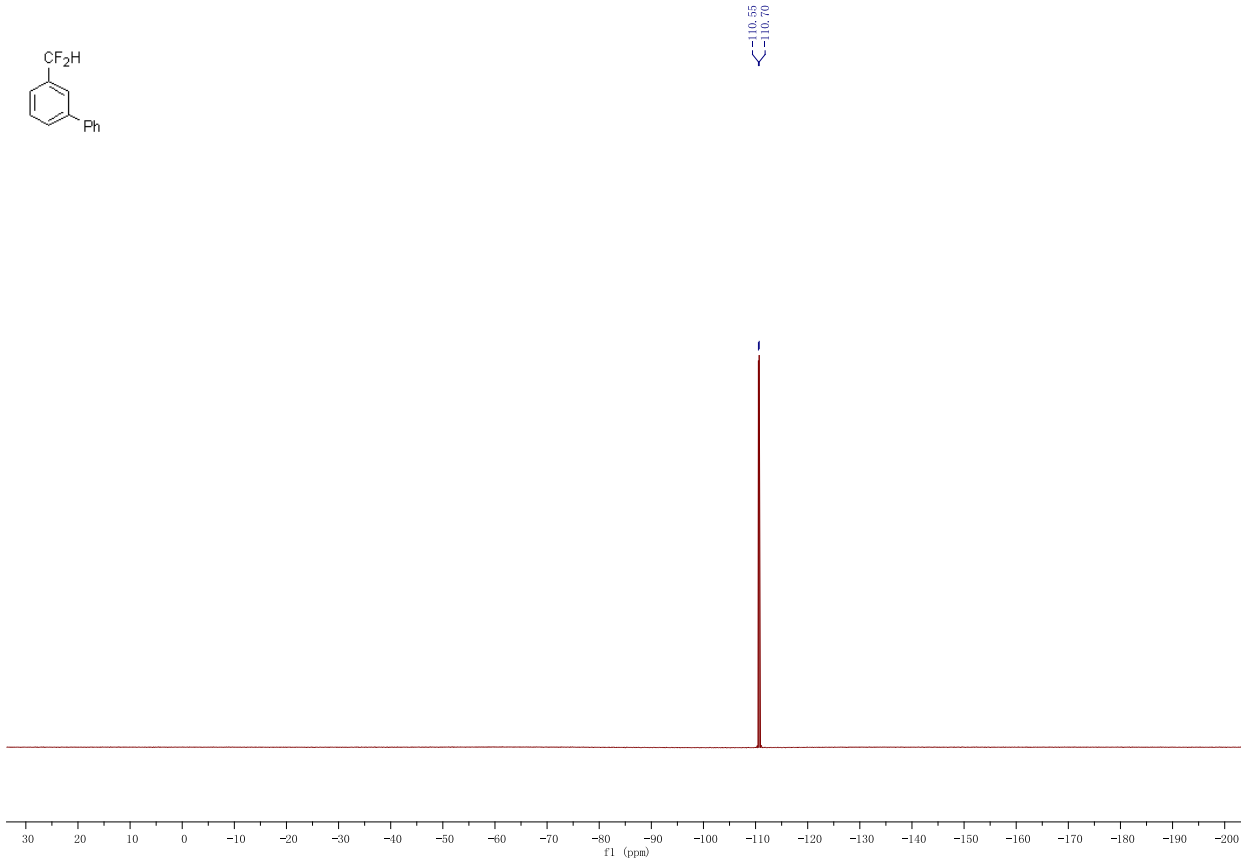

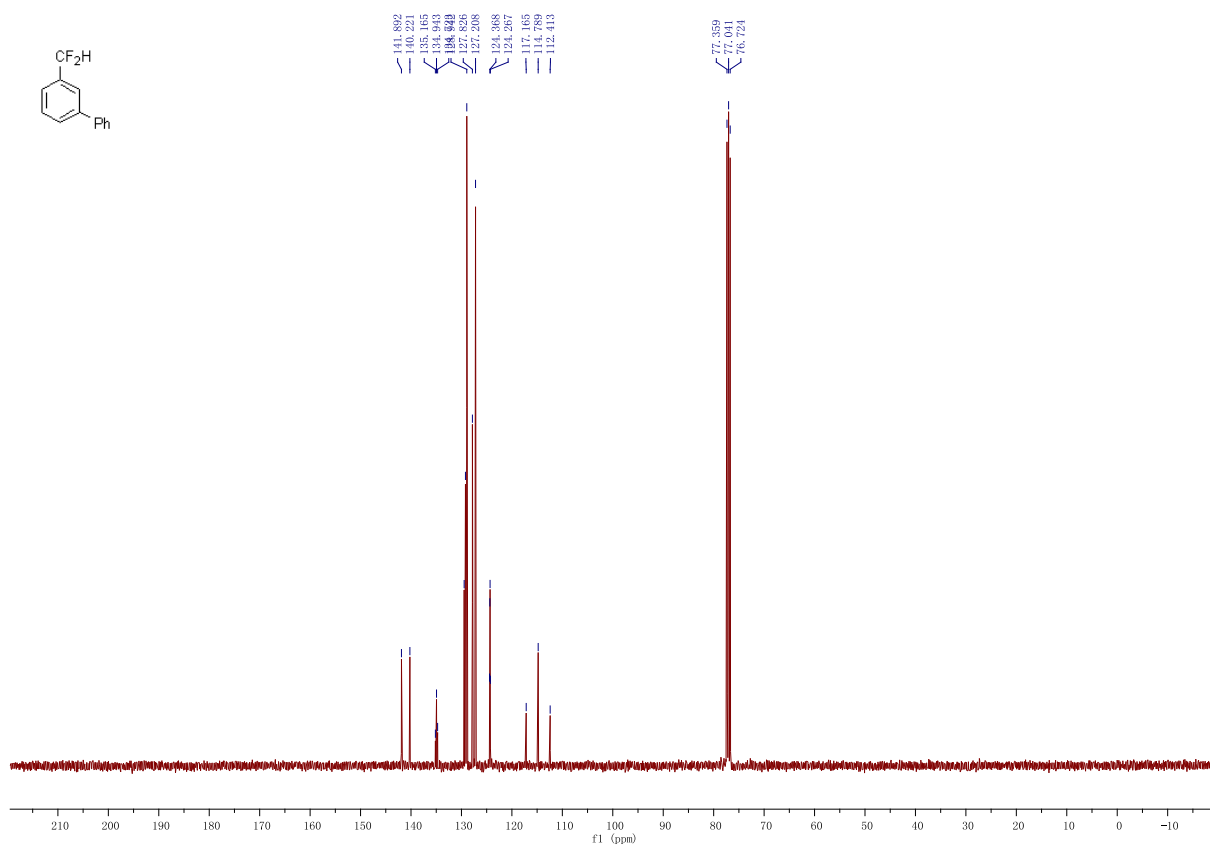

## 1-(Tert-butyl)-4-(difluoromethyl)benzene (7)

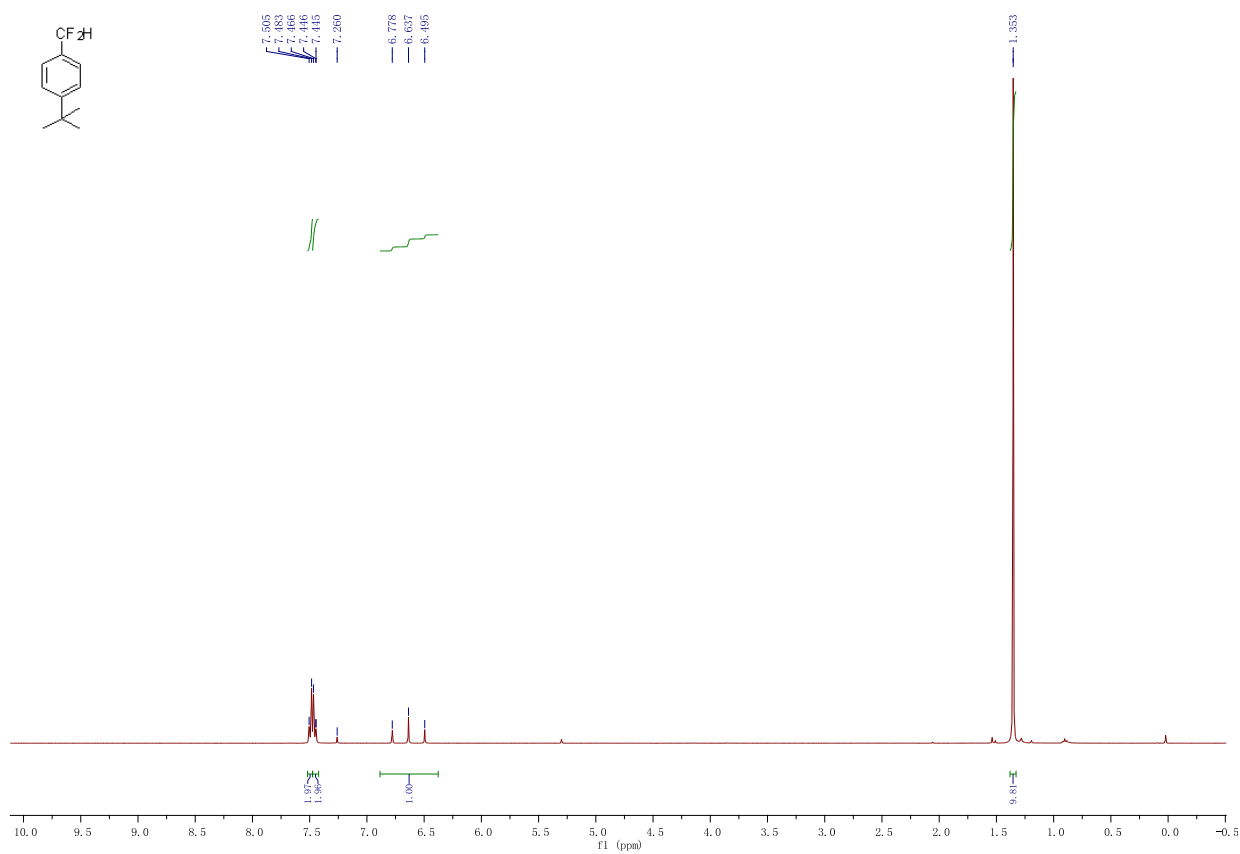

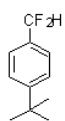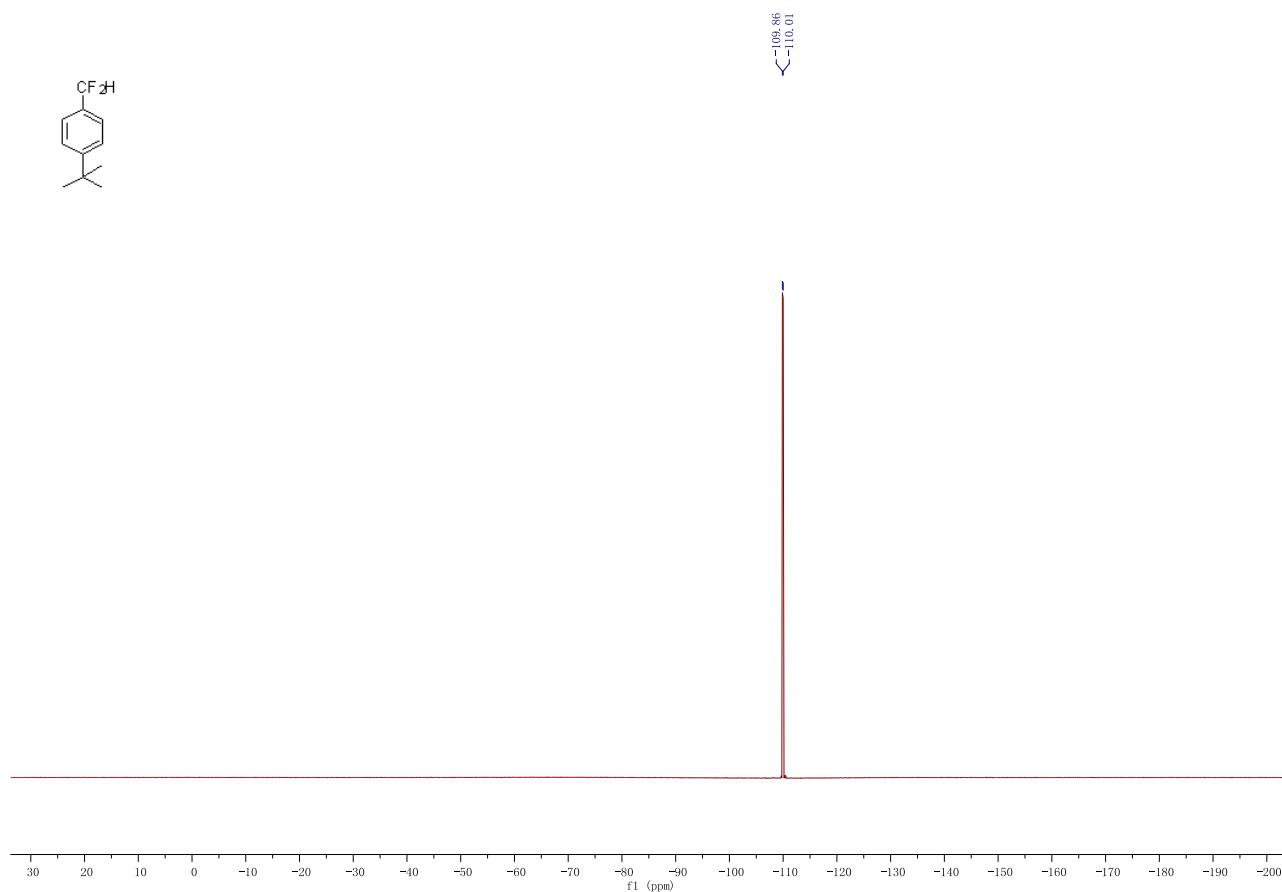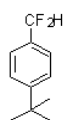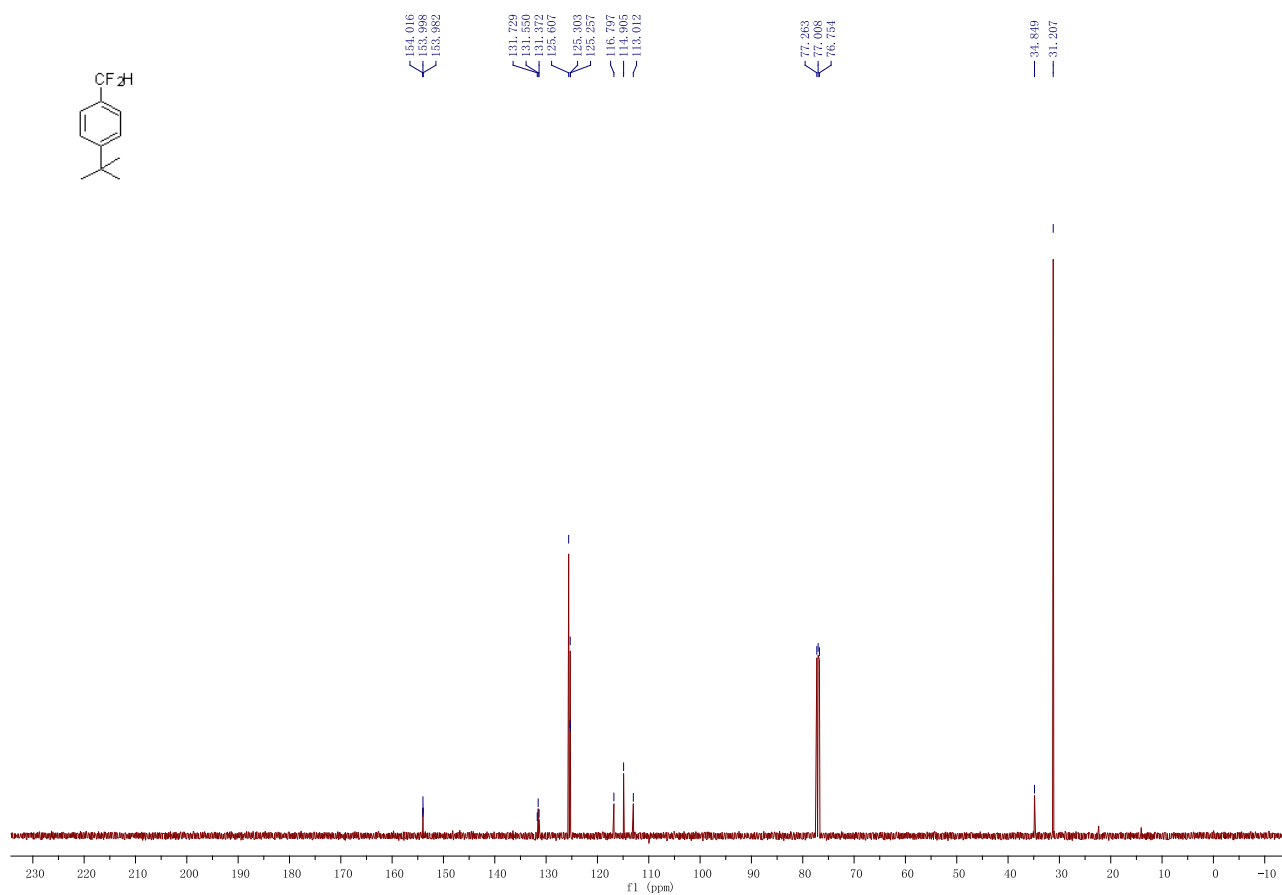



**1-(Benzyloxy)-4-(difluoromethyl)benzene (8).**

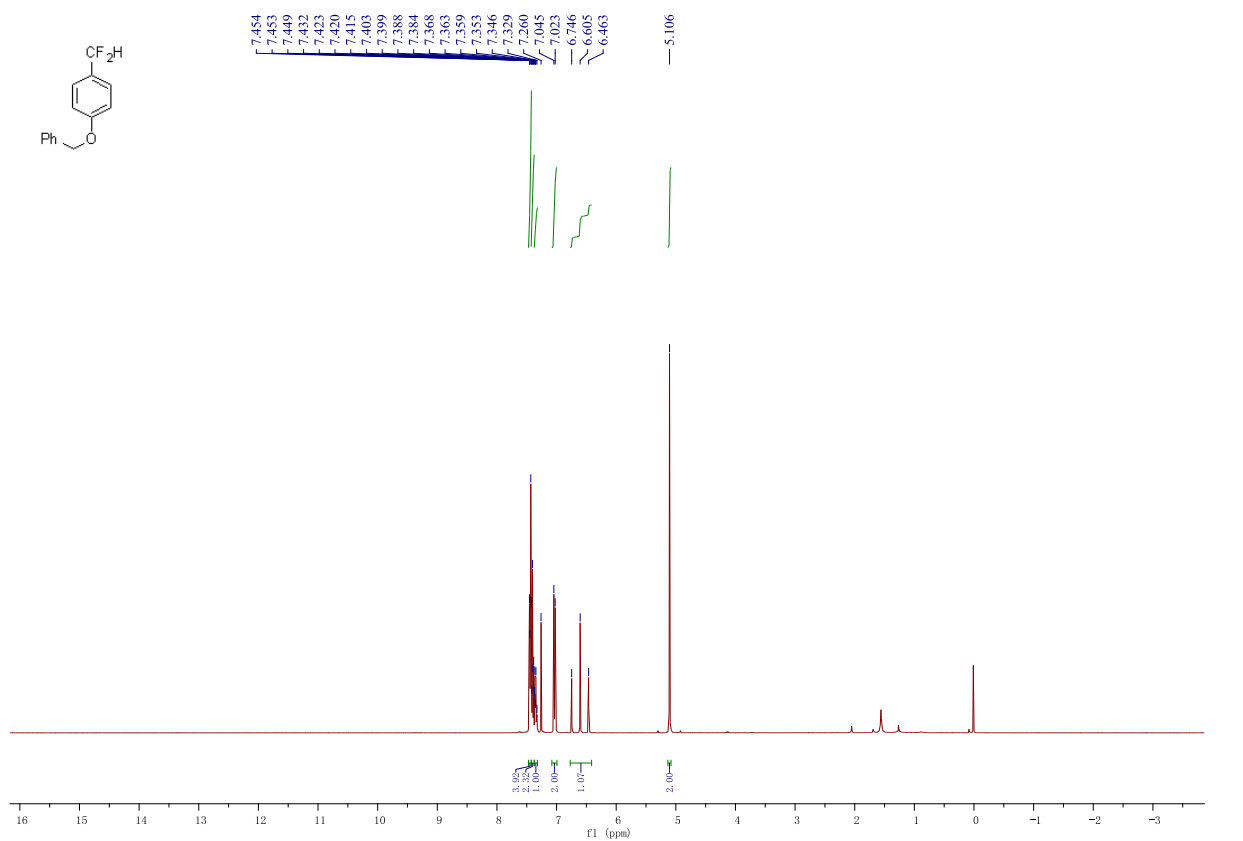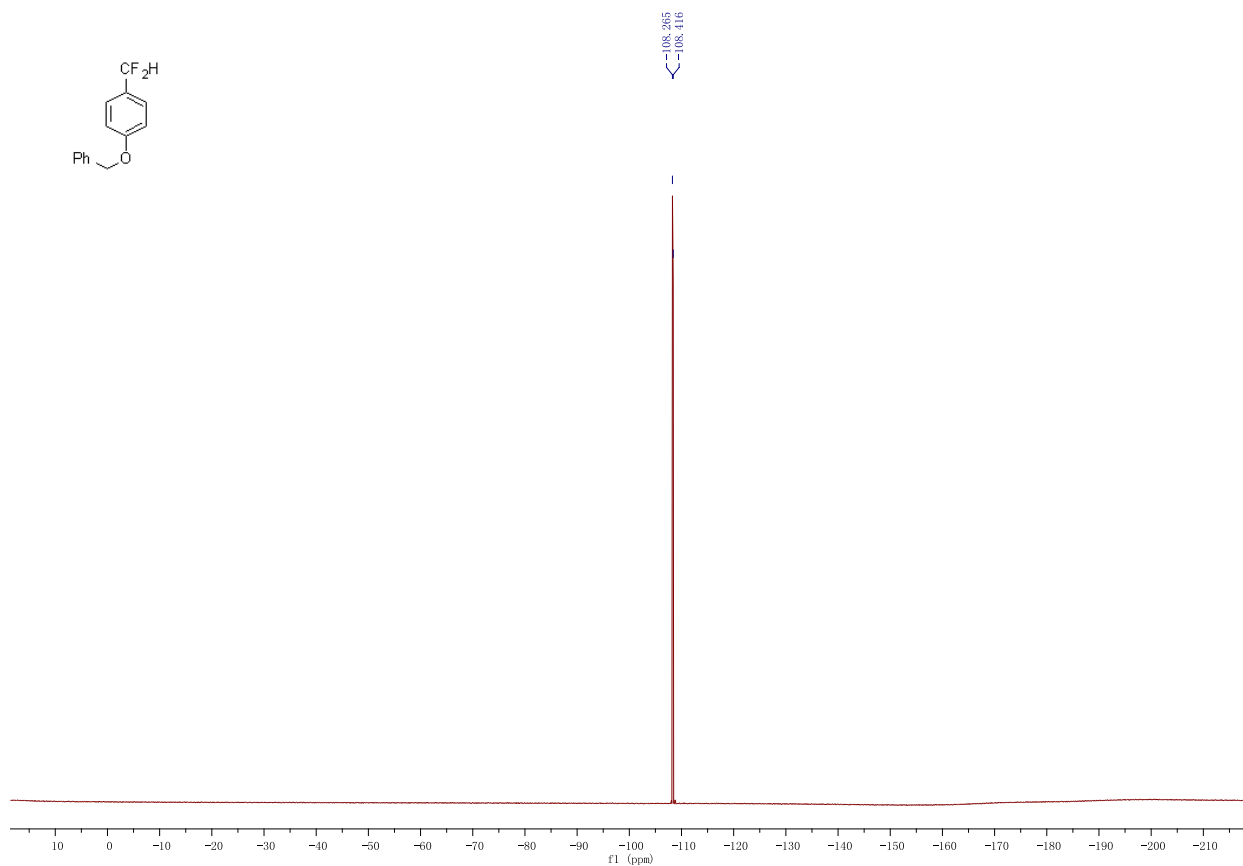

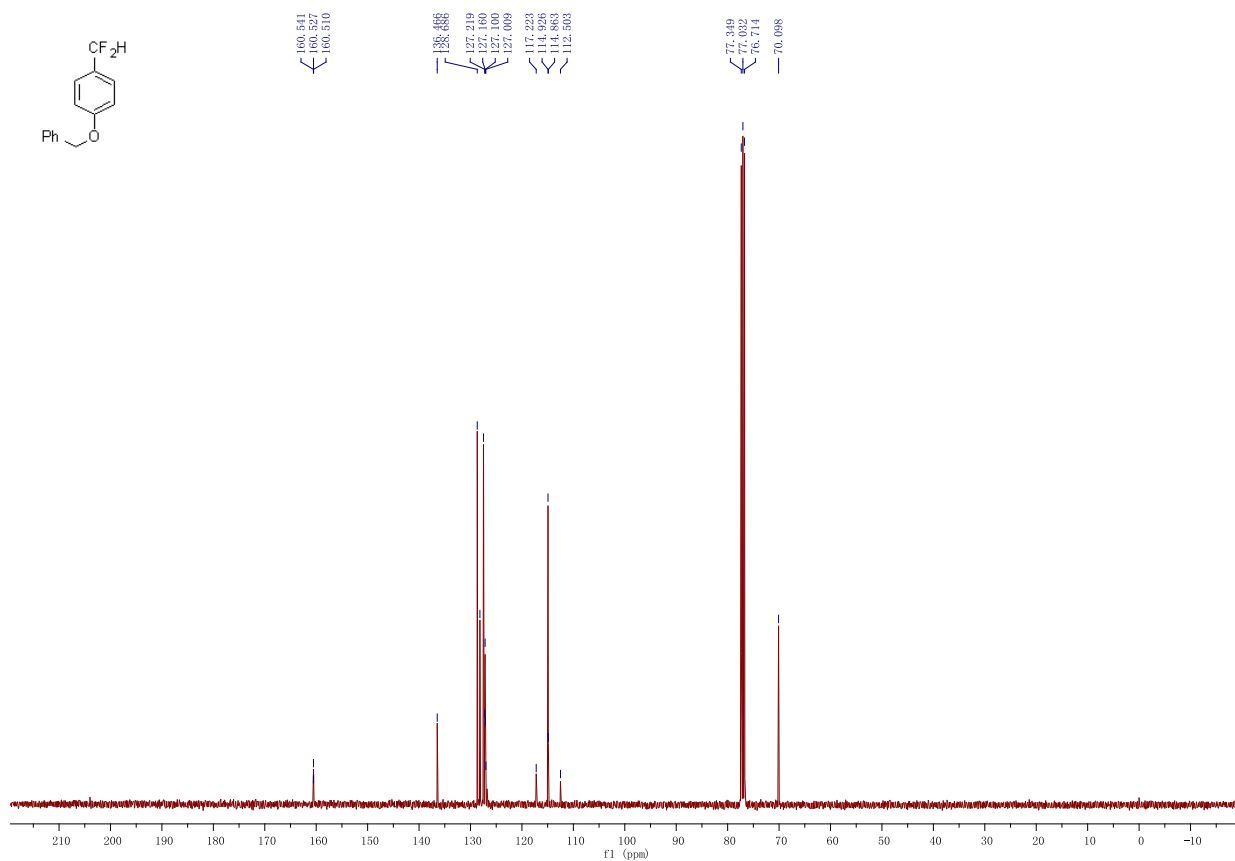

### 1-(Difluoromethyl)-4-phenoxybenzene (9).

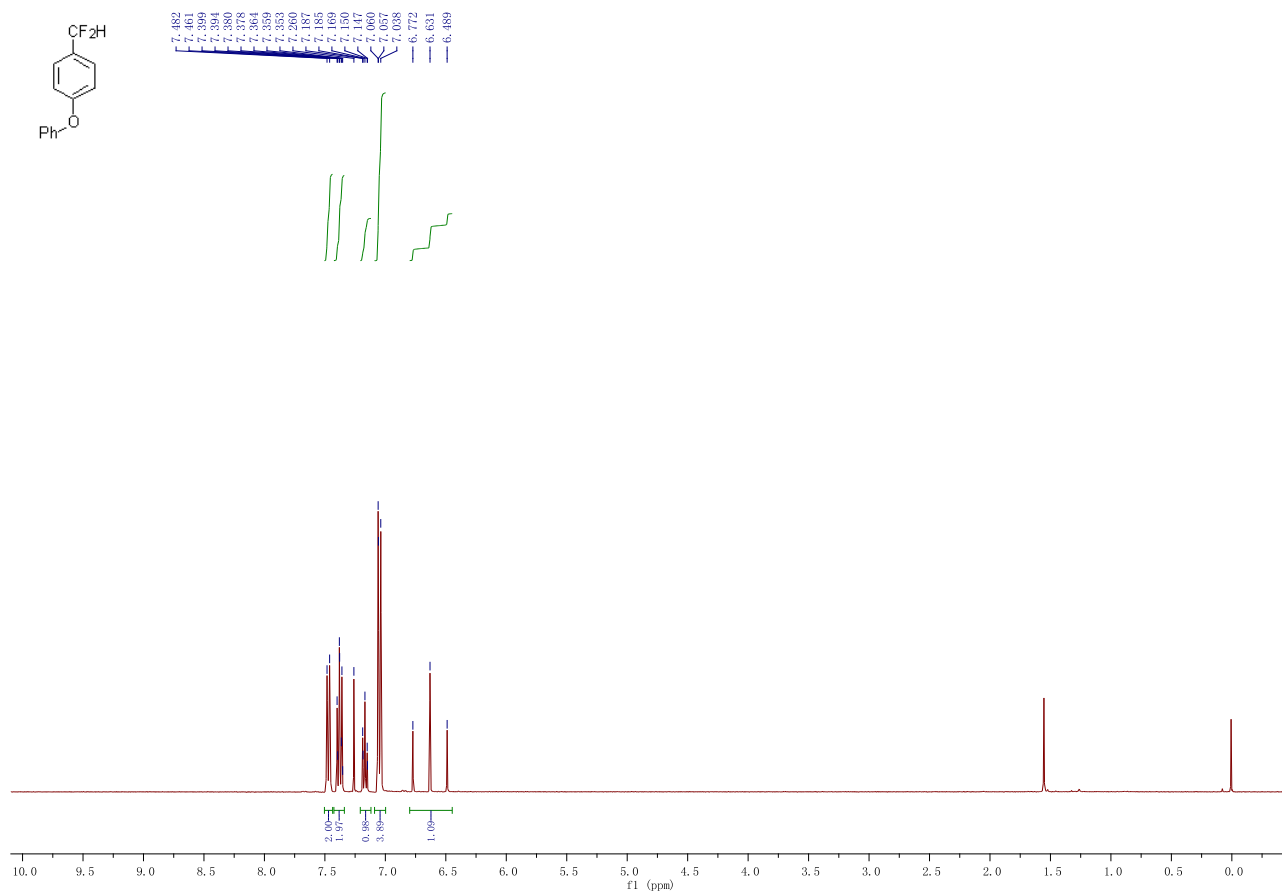

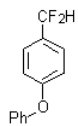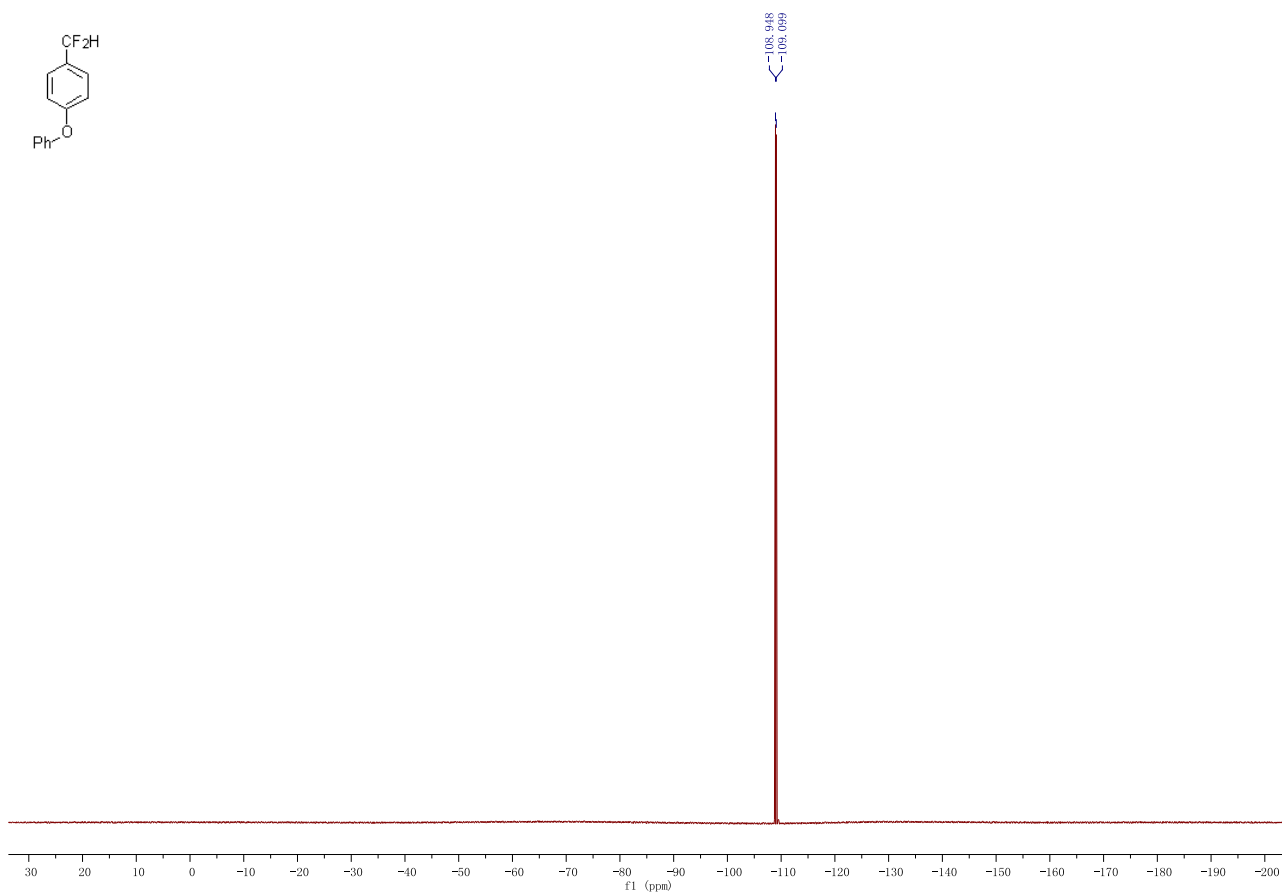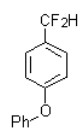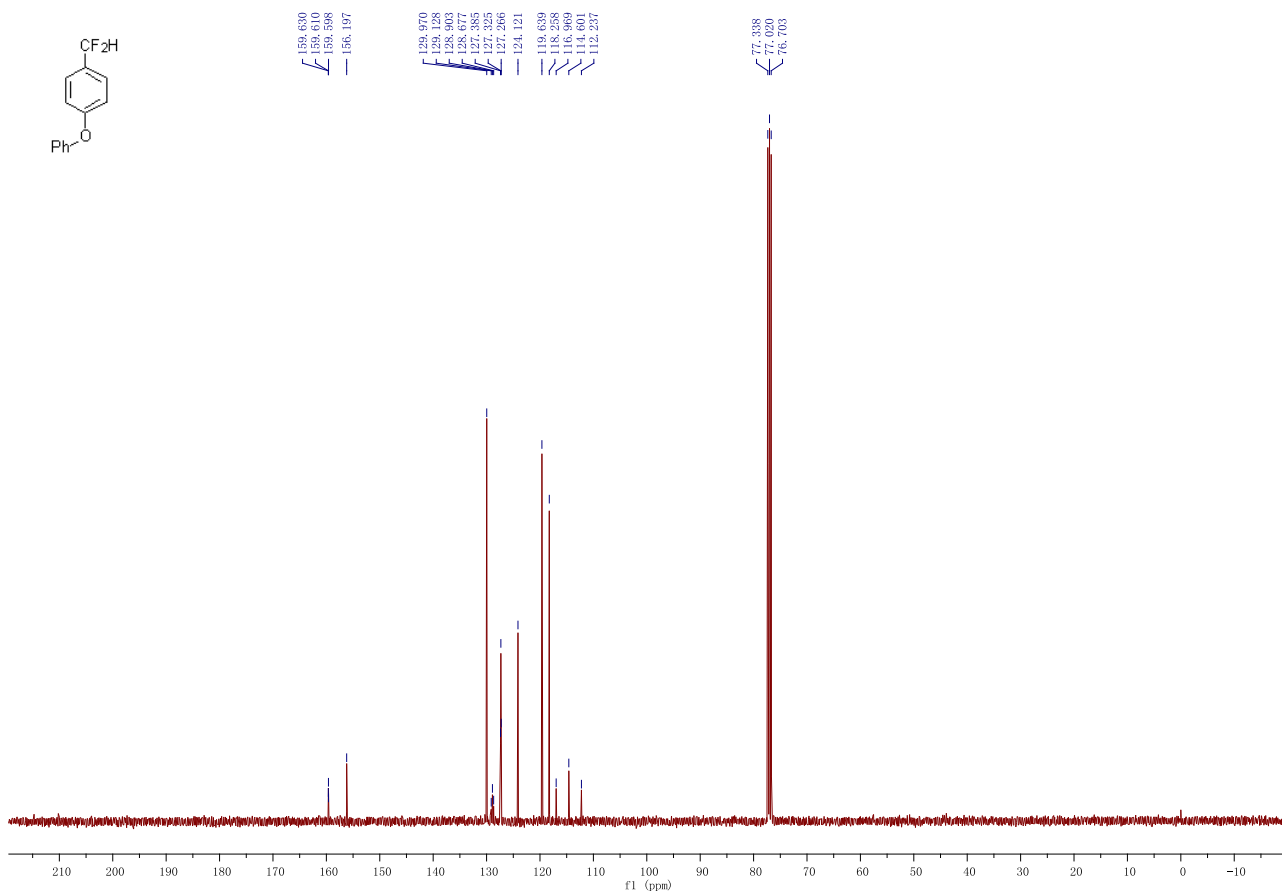

# 1-(Difluoromethyl)-4-methoxybenzene (10).

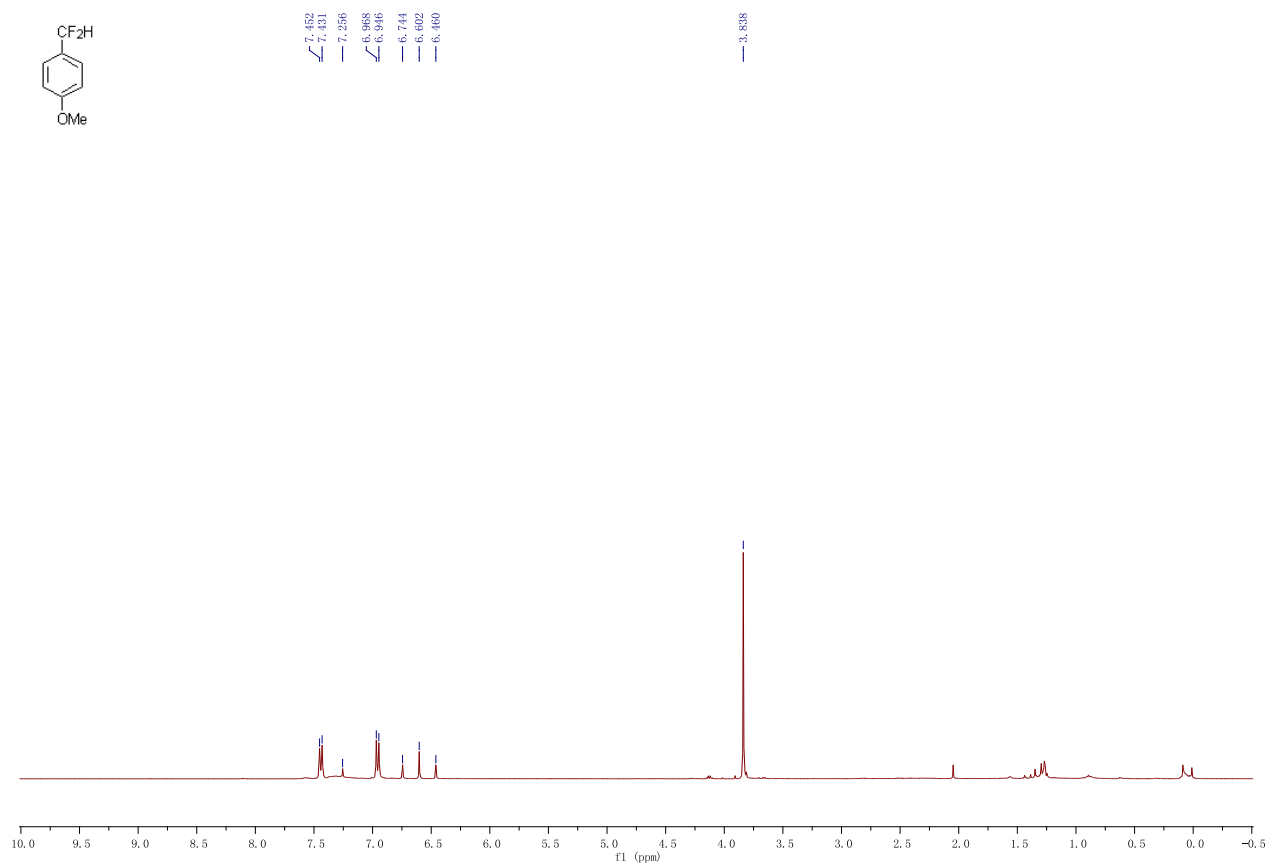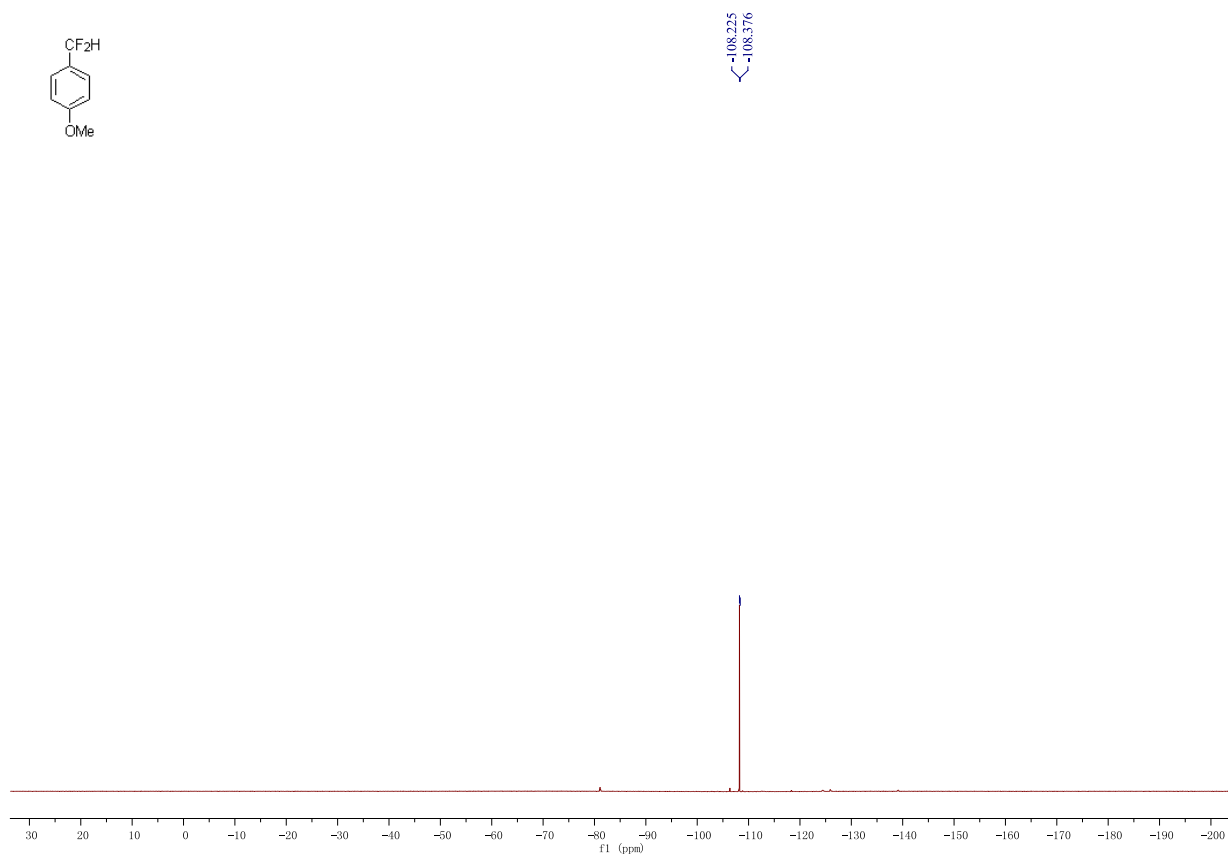

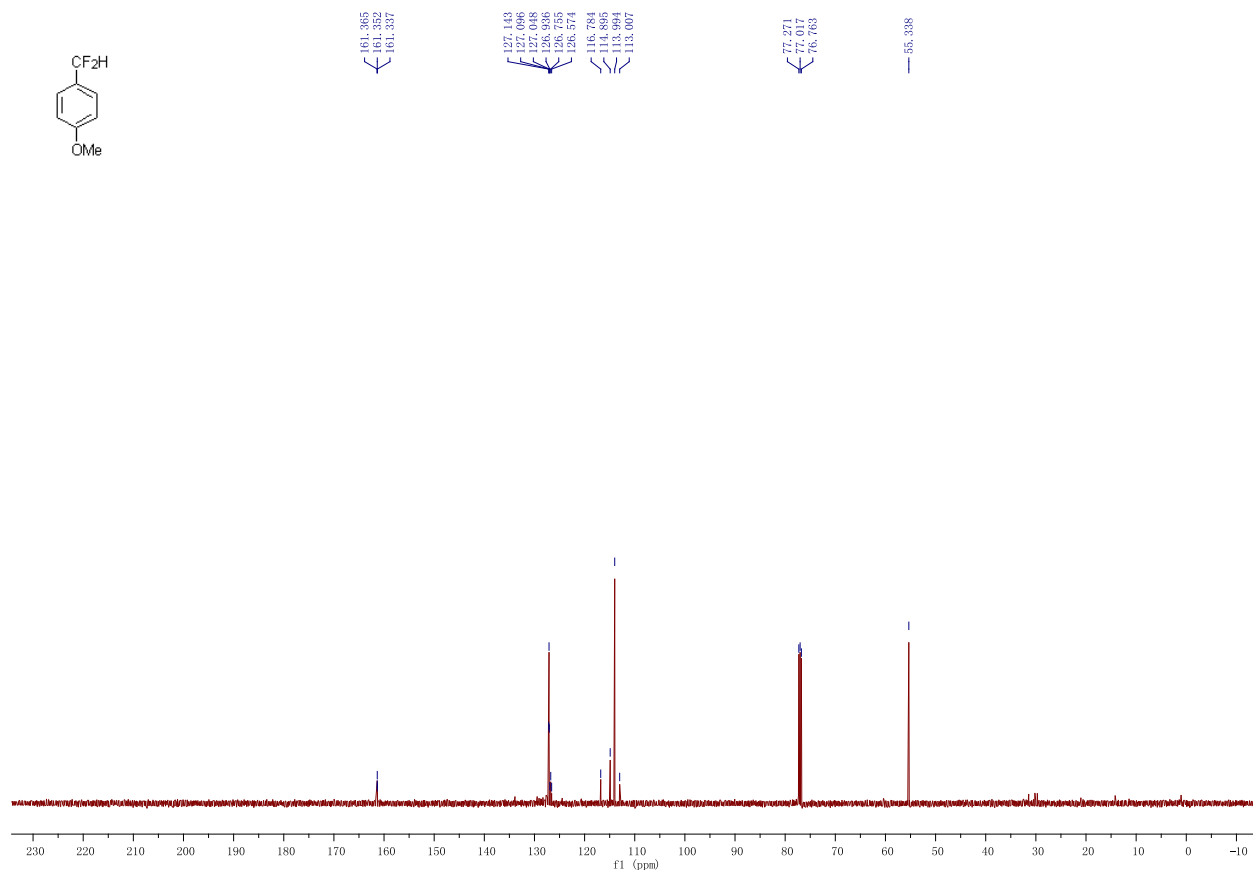

# 1-(Difluoromethyl)-3,5-dimethoxybenzene (11).

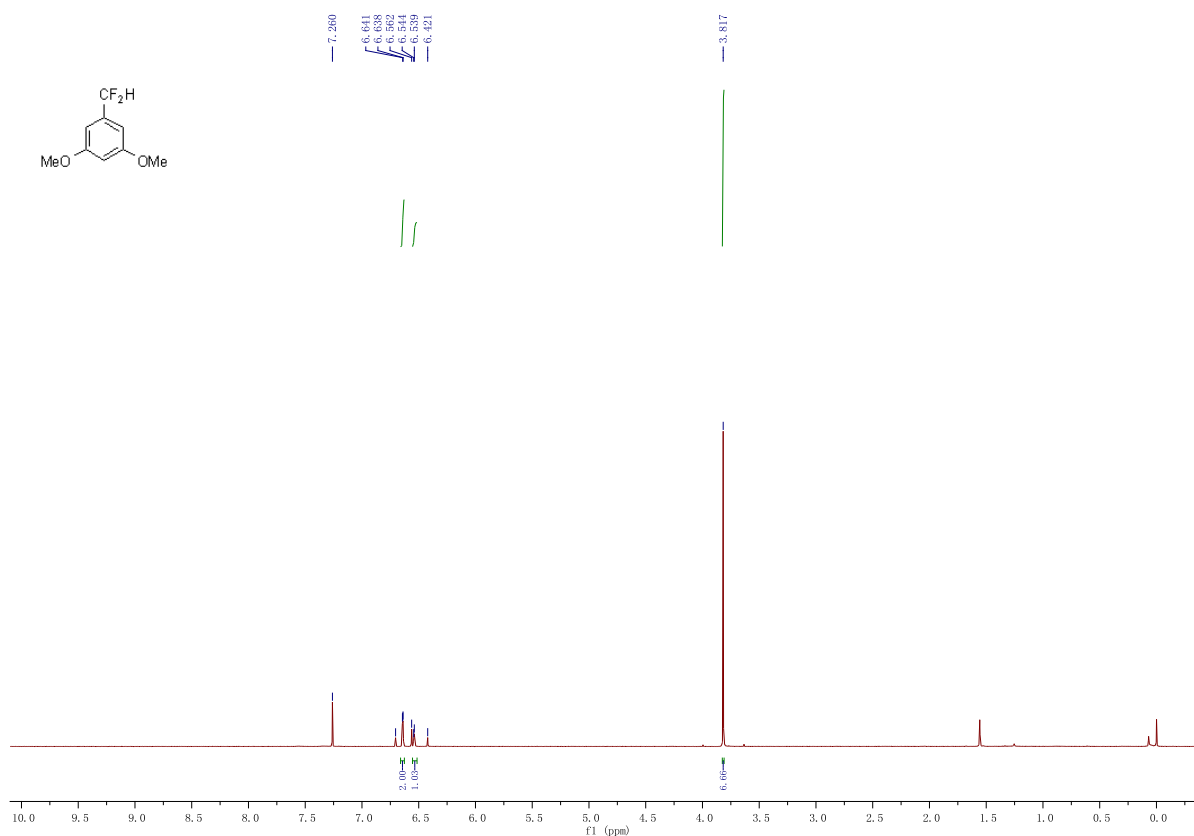

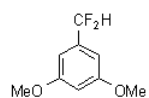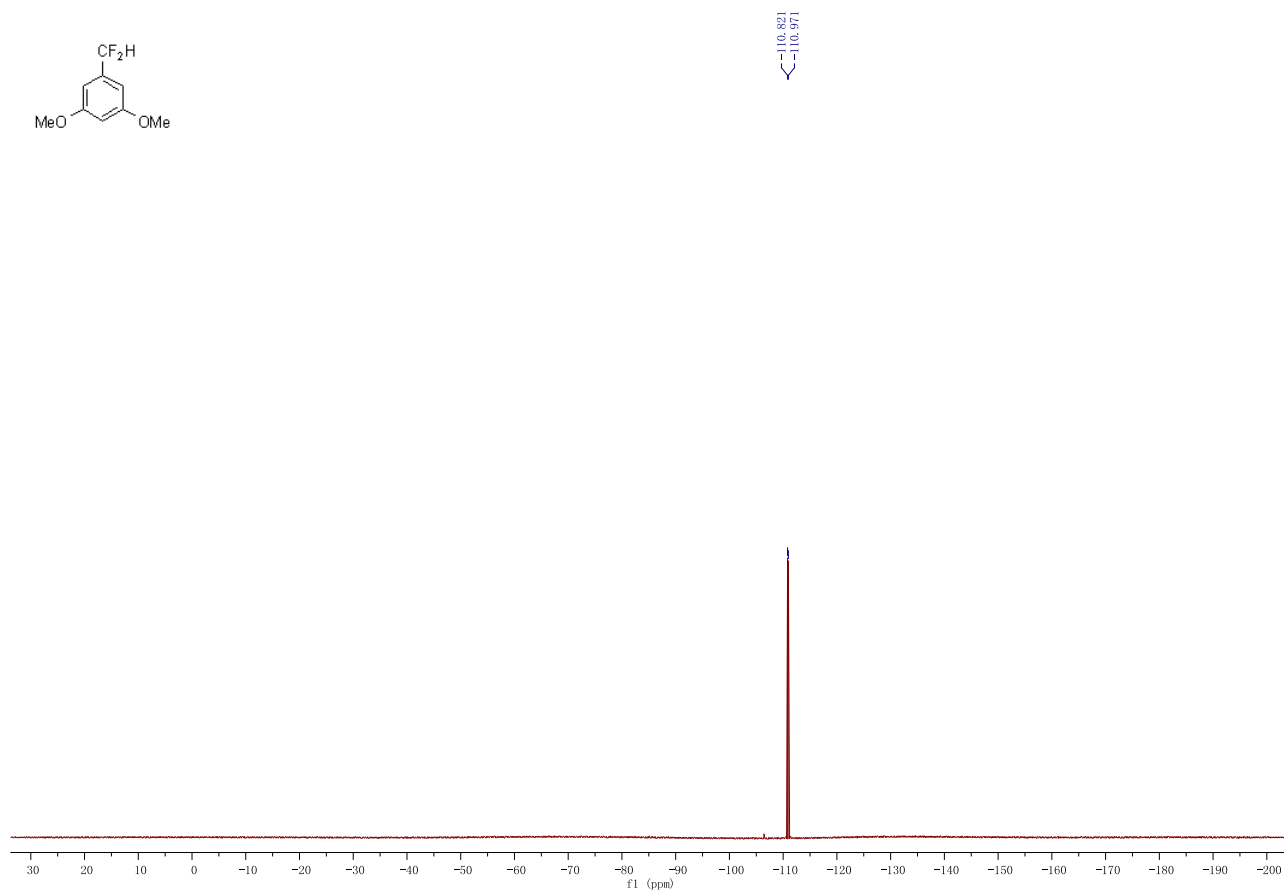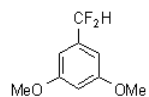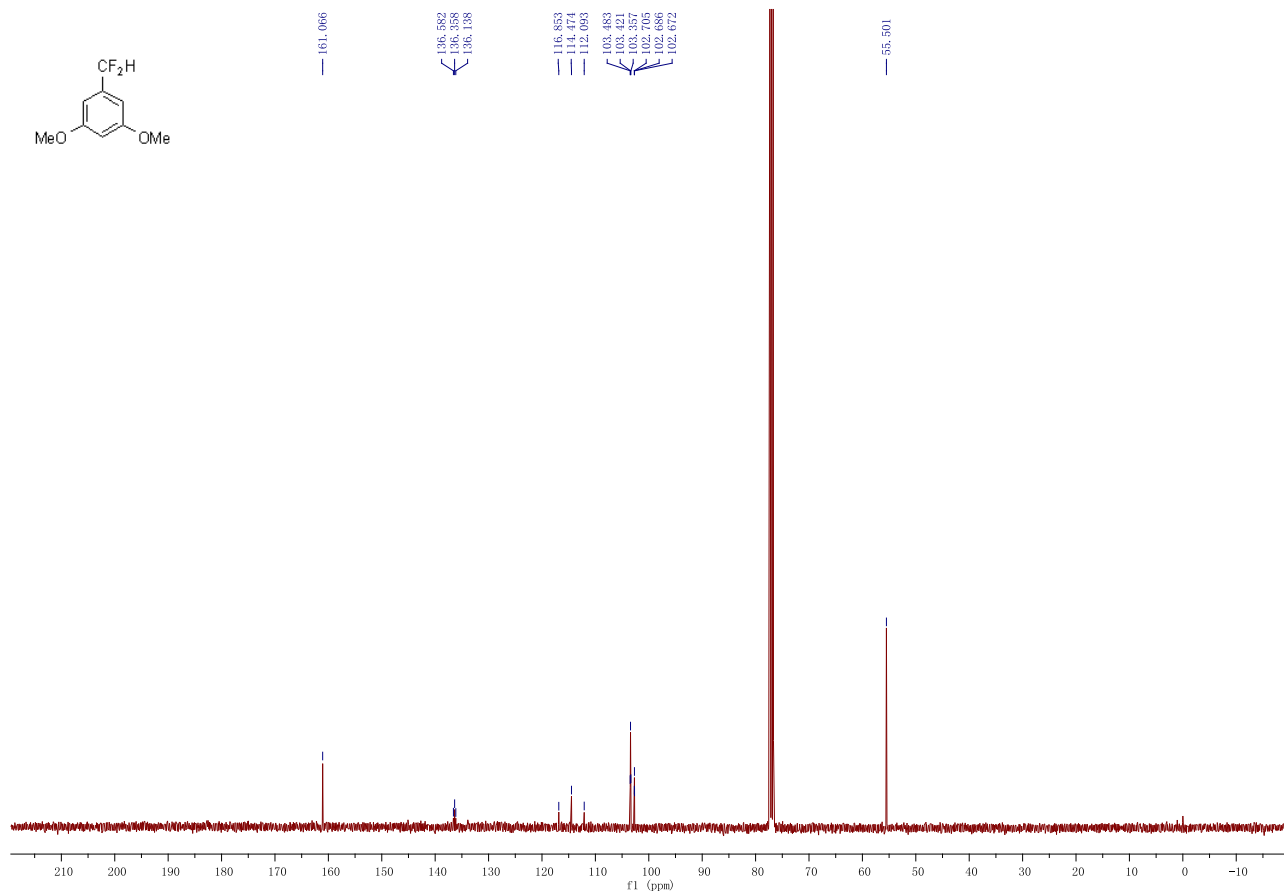

# **5-(Difluoromethyl)benzo[d][1,3]dioxole (12).**

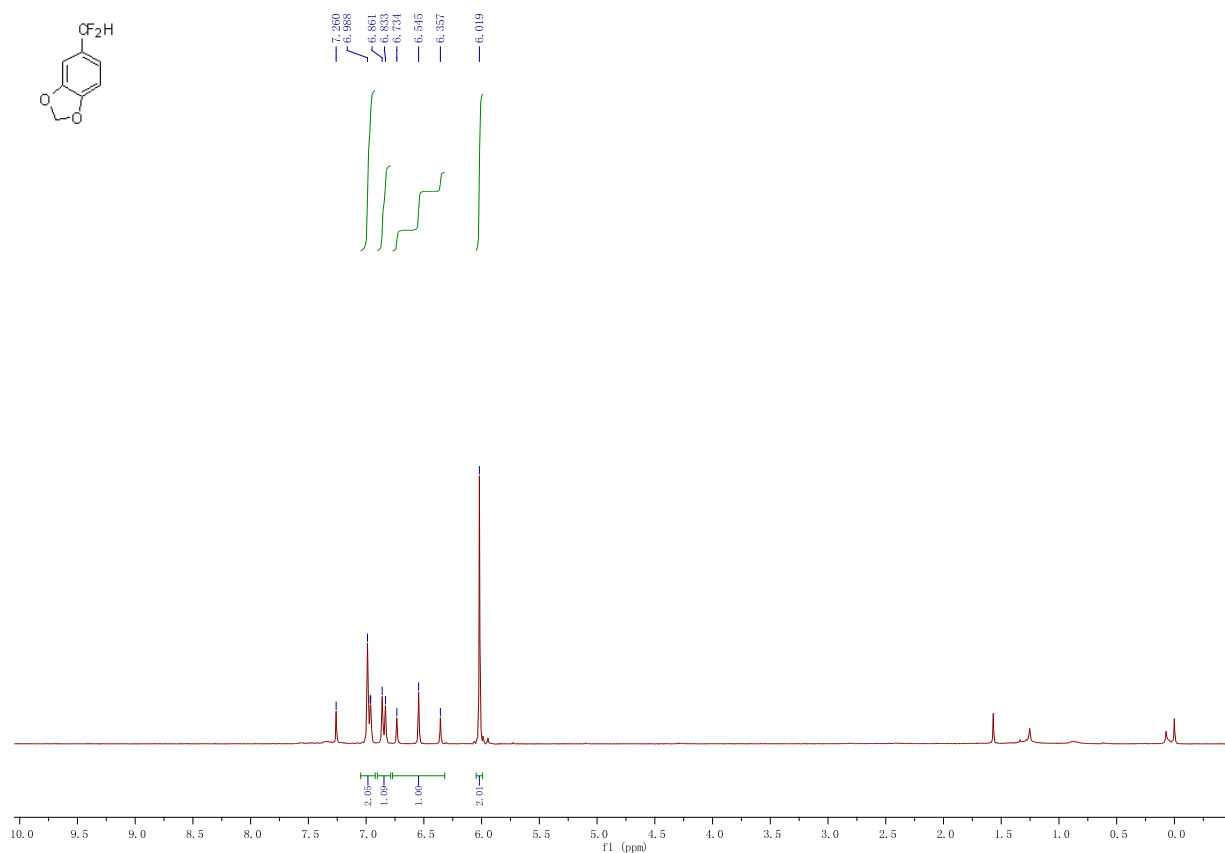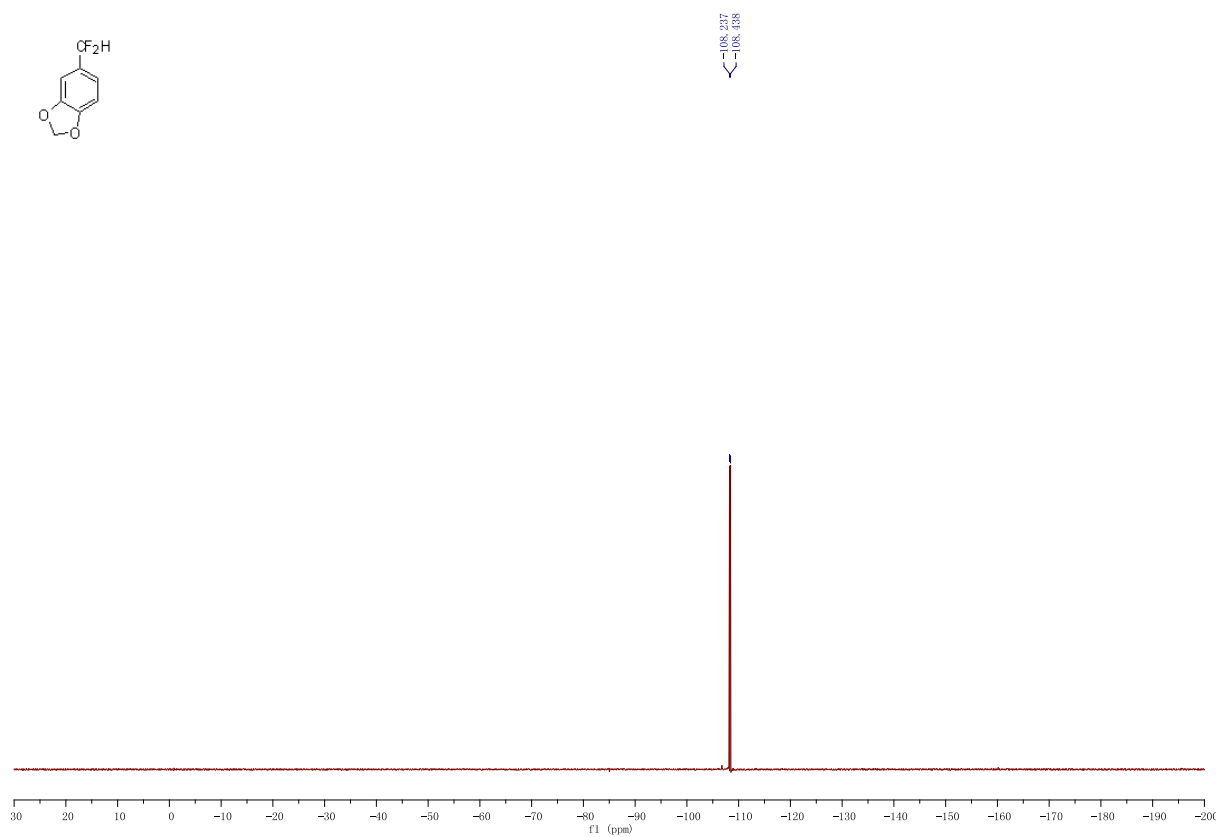

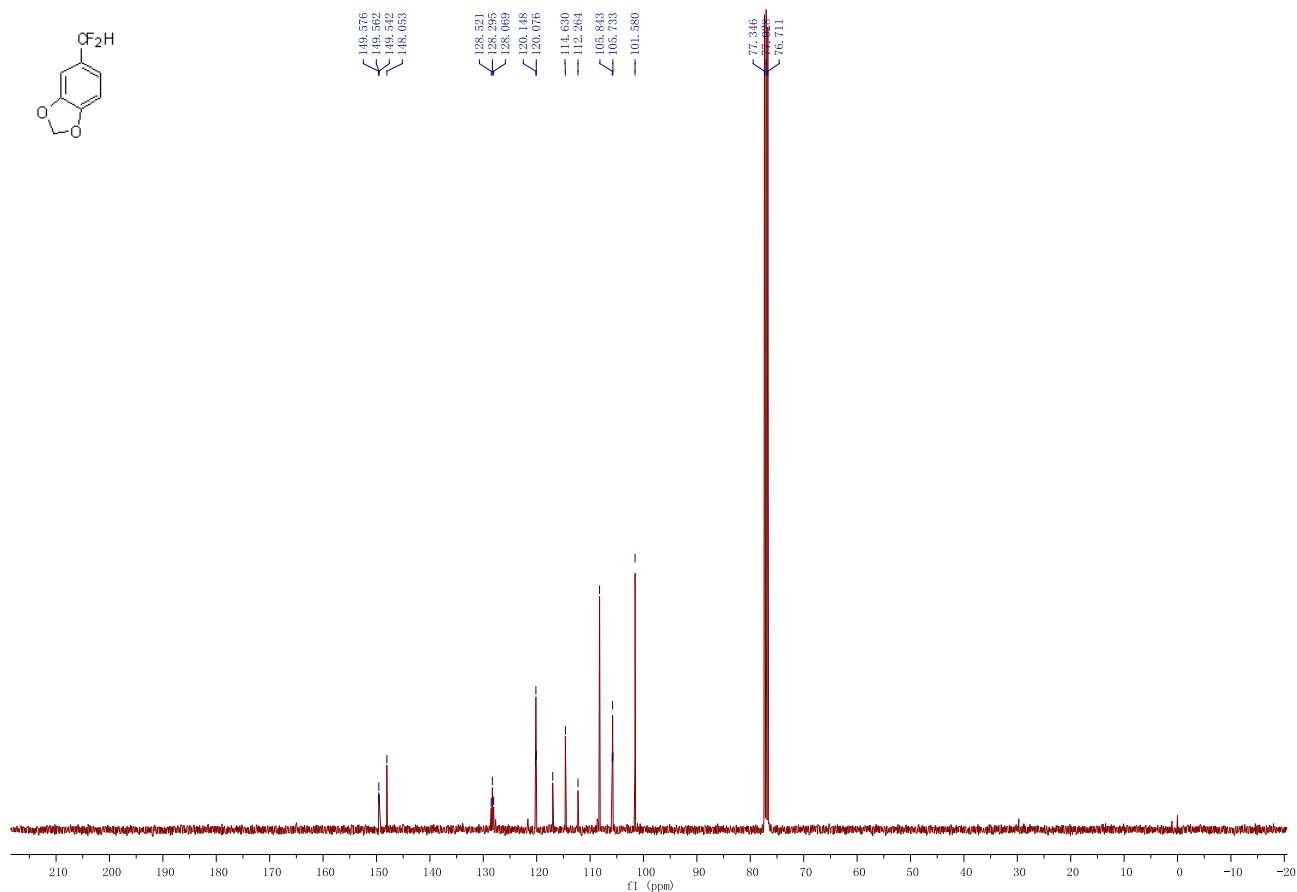

# 1-((4-(Difluoromethyl)benzyl)oxy)naphthalene (13).

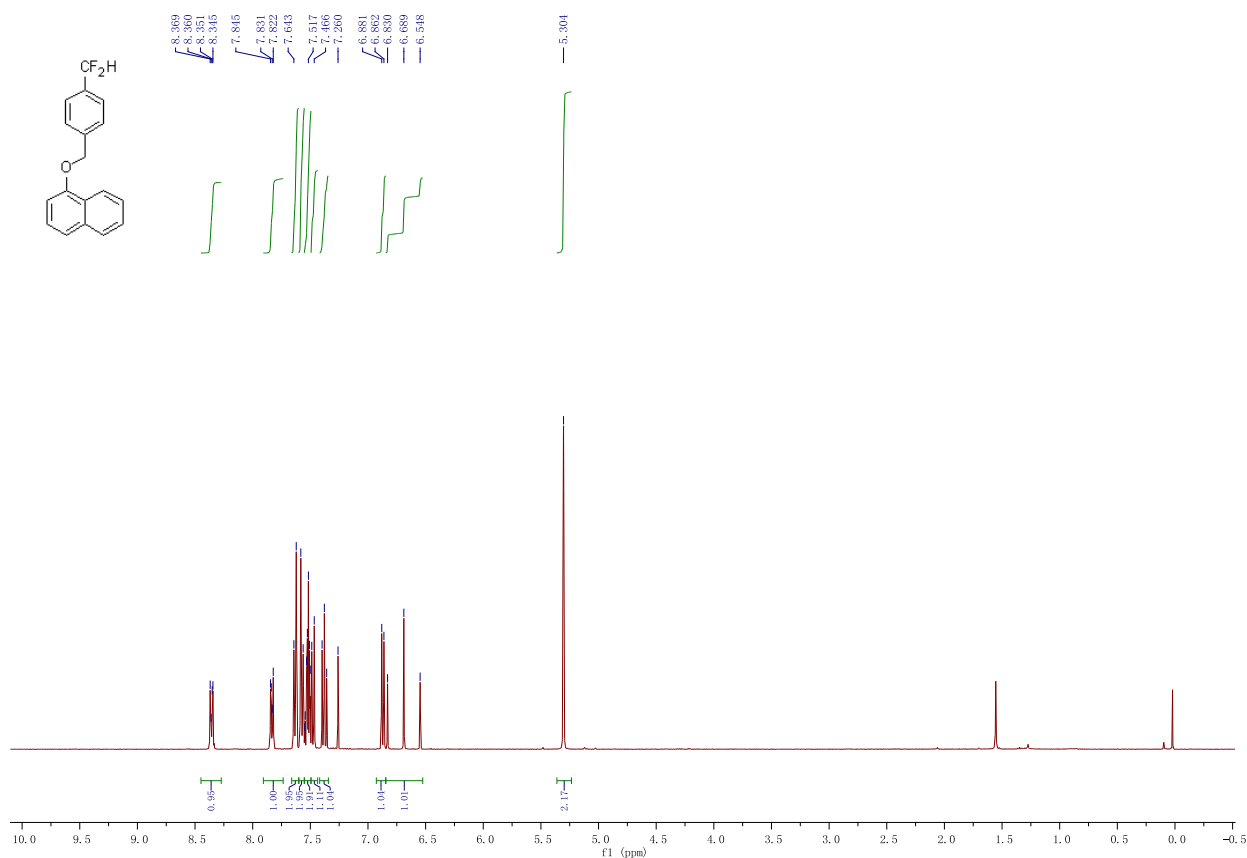



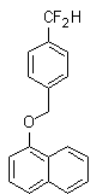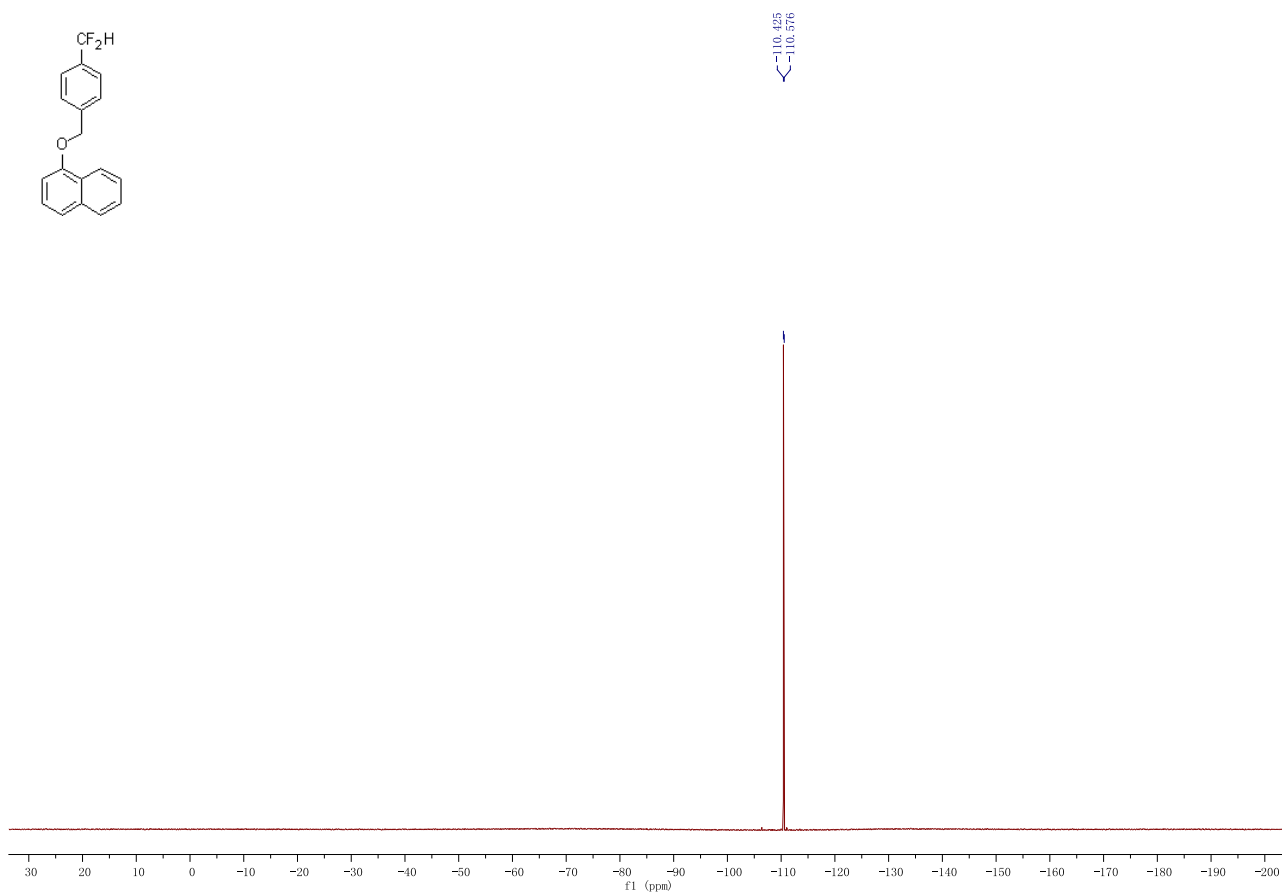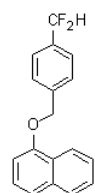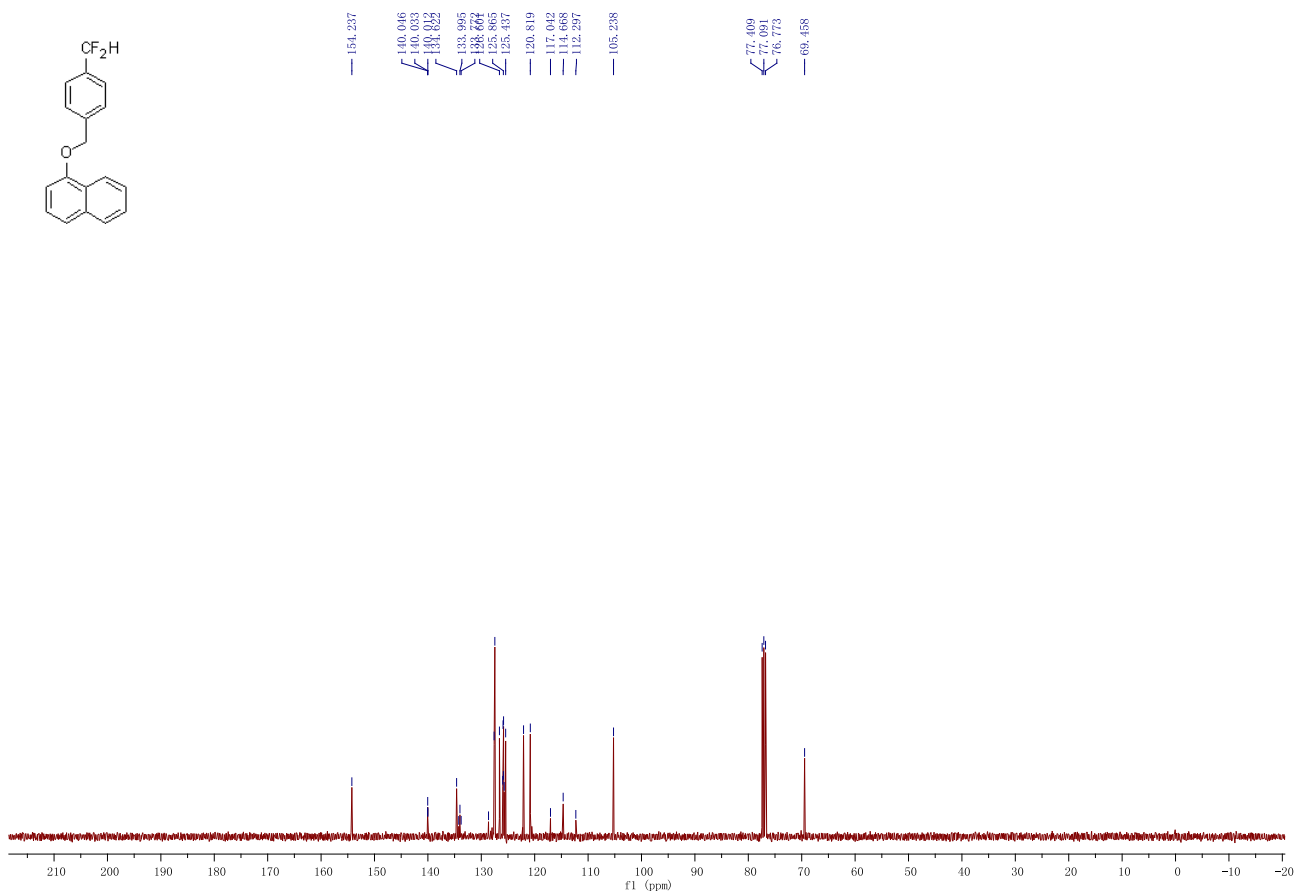

## 2-(Difluoromethyl)-1,4-dimethylbenzene (14).

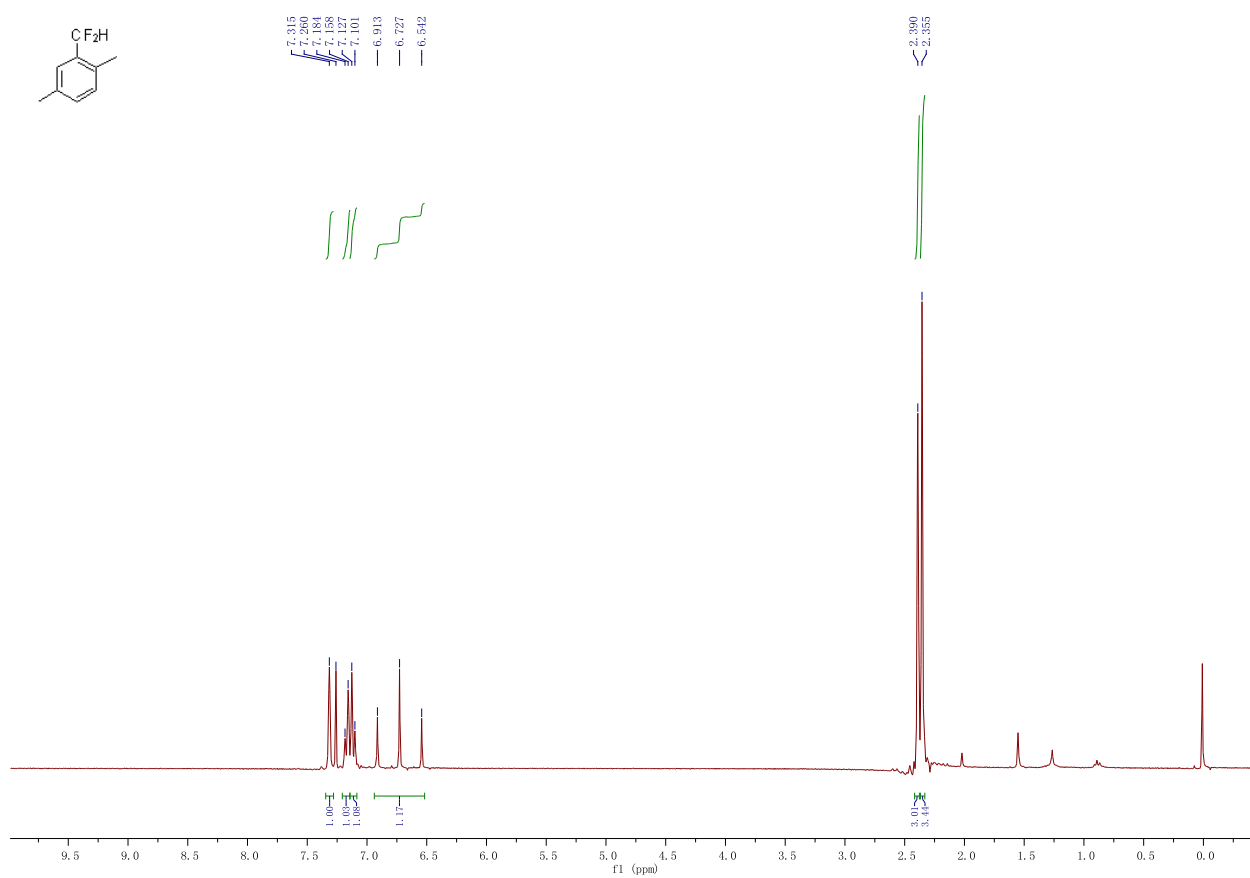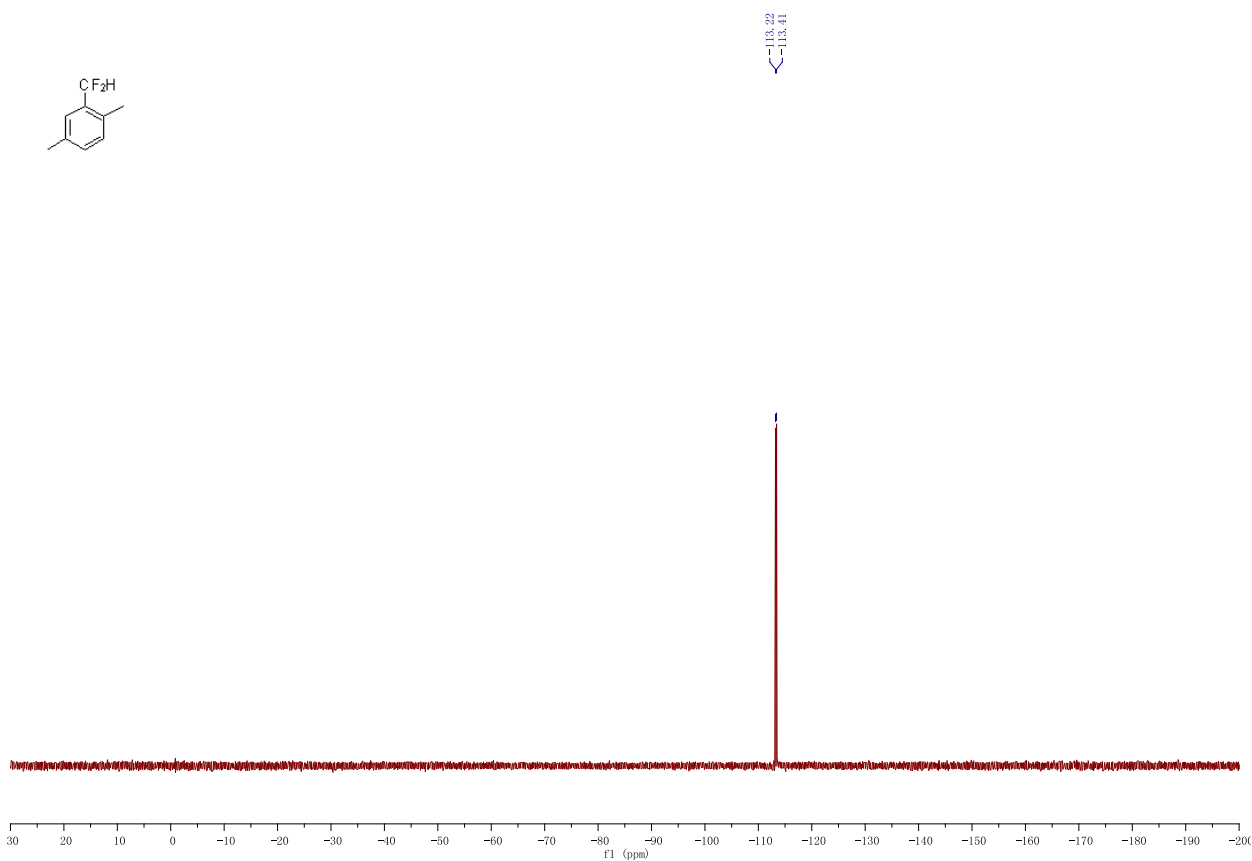

# 1-(Difluoromethyl)naphthalene (15).

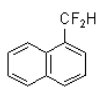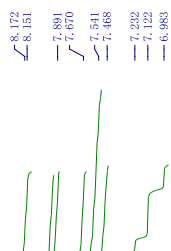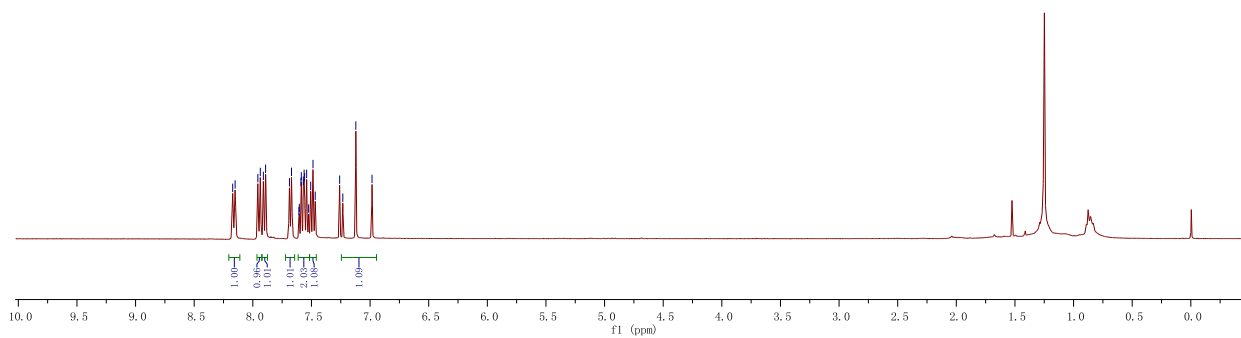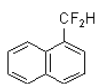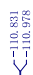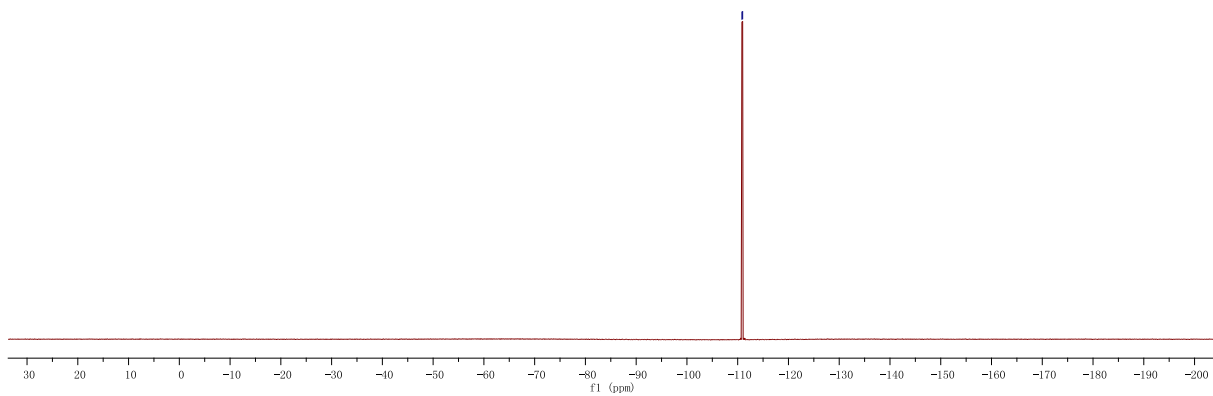

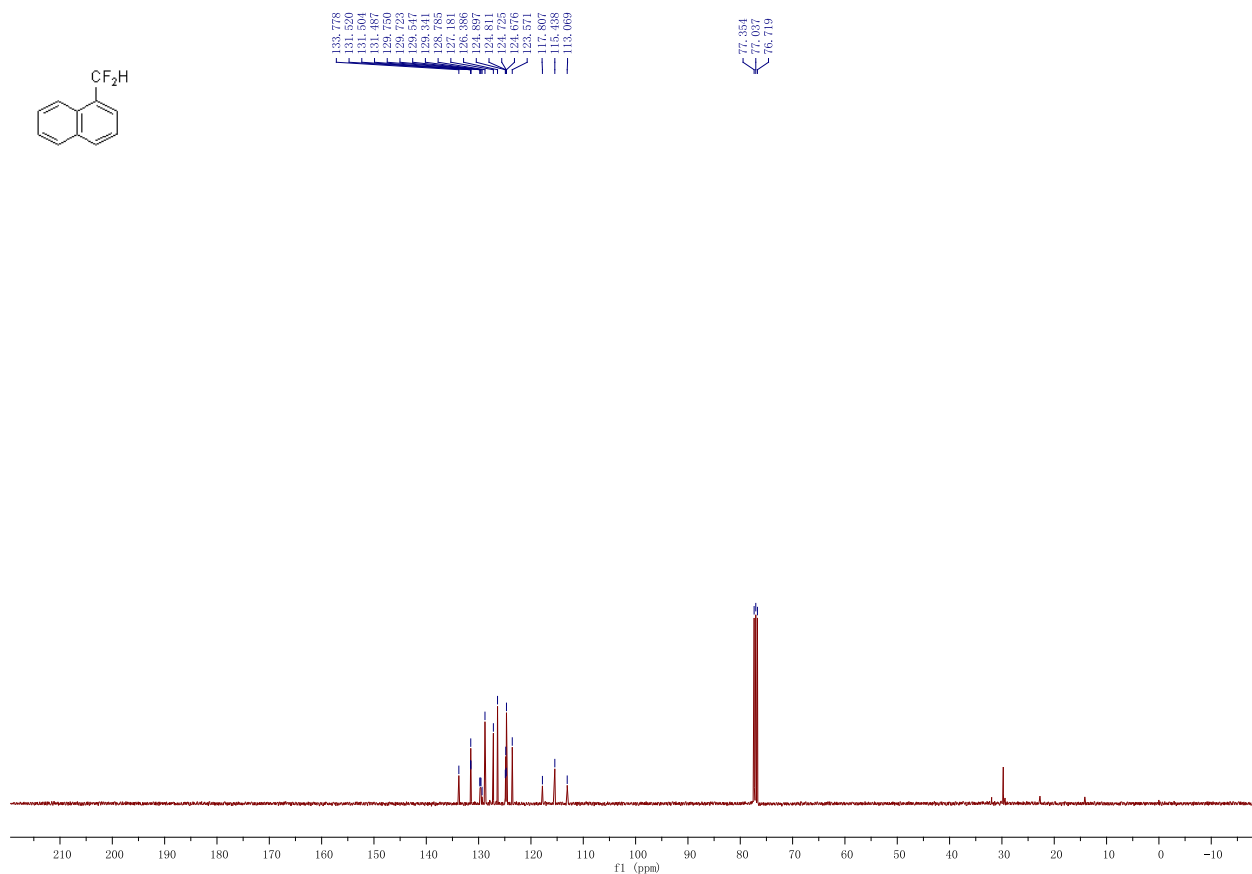

## 2-(Difluoromethyl)naphthalene (16).

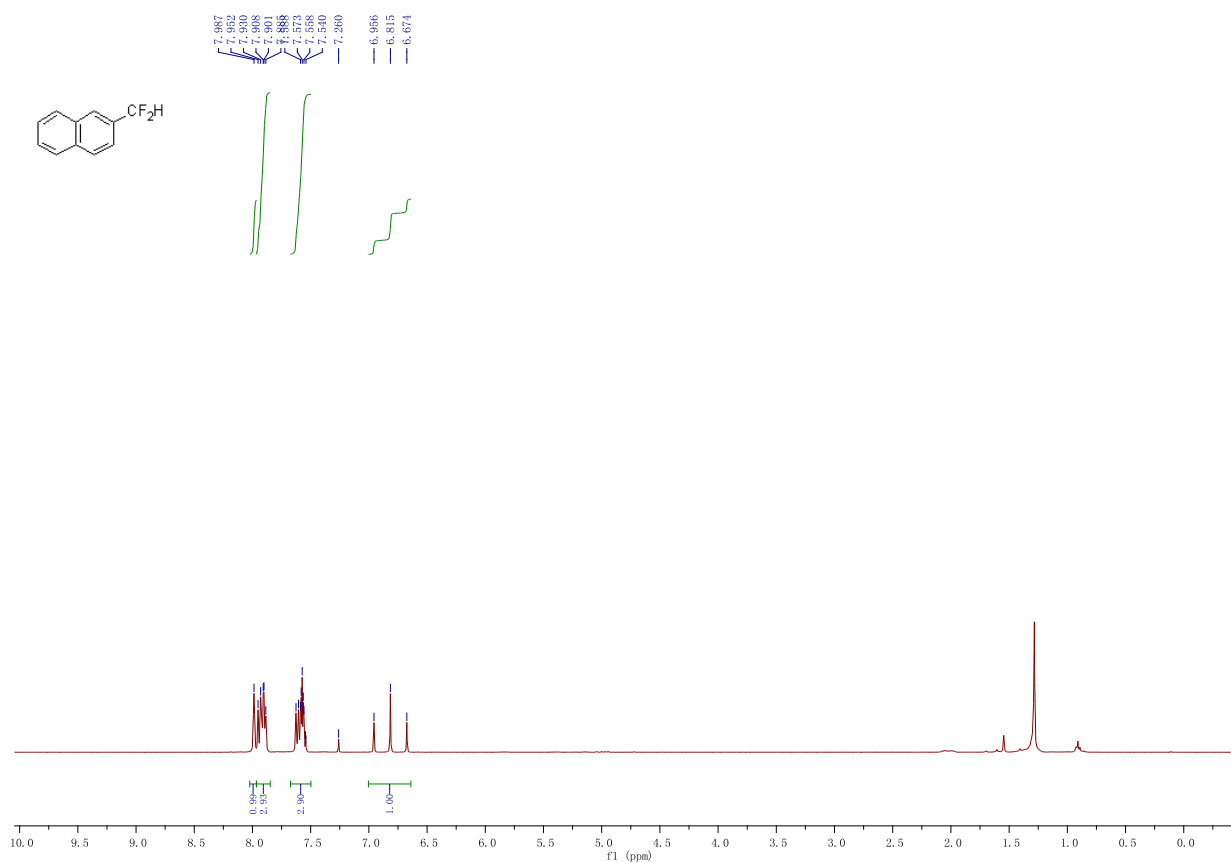

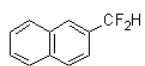

109.79  
109.94

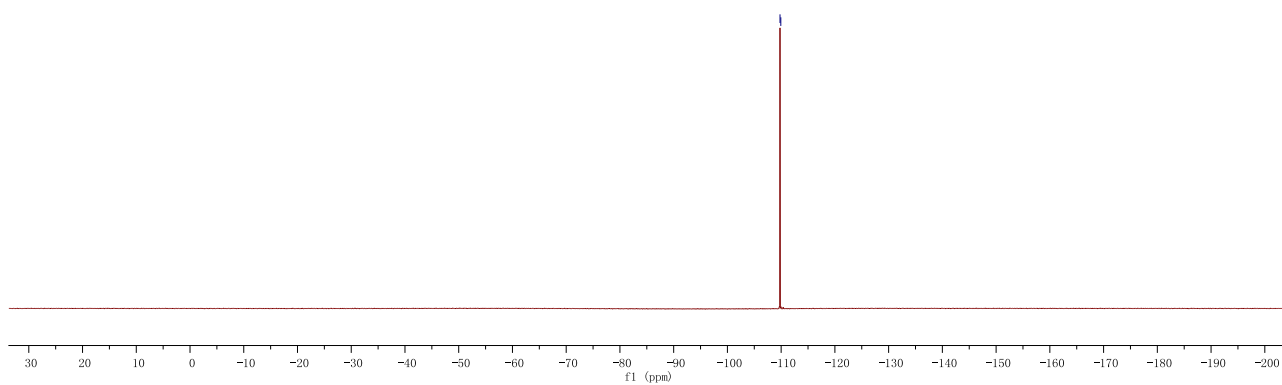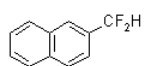

134.33  
132.58  
131.82  
131.61  
131.46  
127.71  
125.84  
121.99  
116.99  
115.09  
113.19  
77.31  
77.05  
76.80

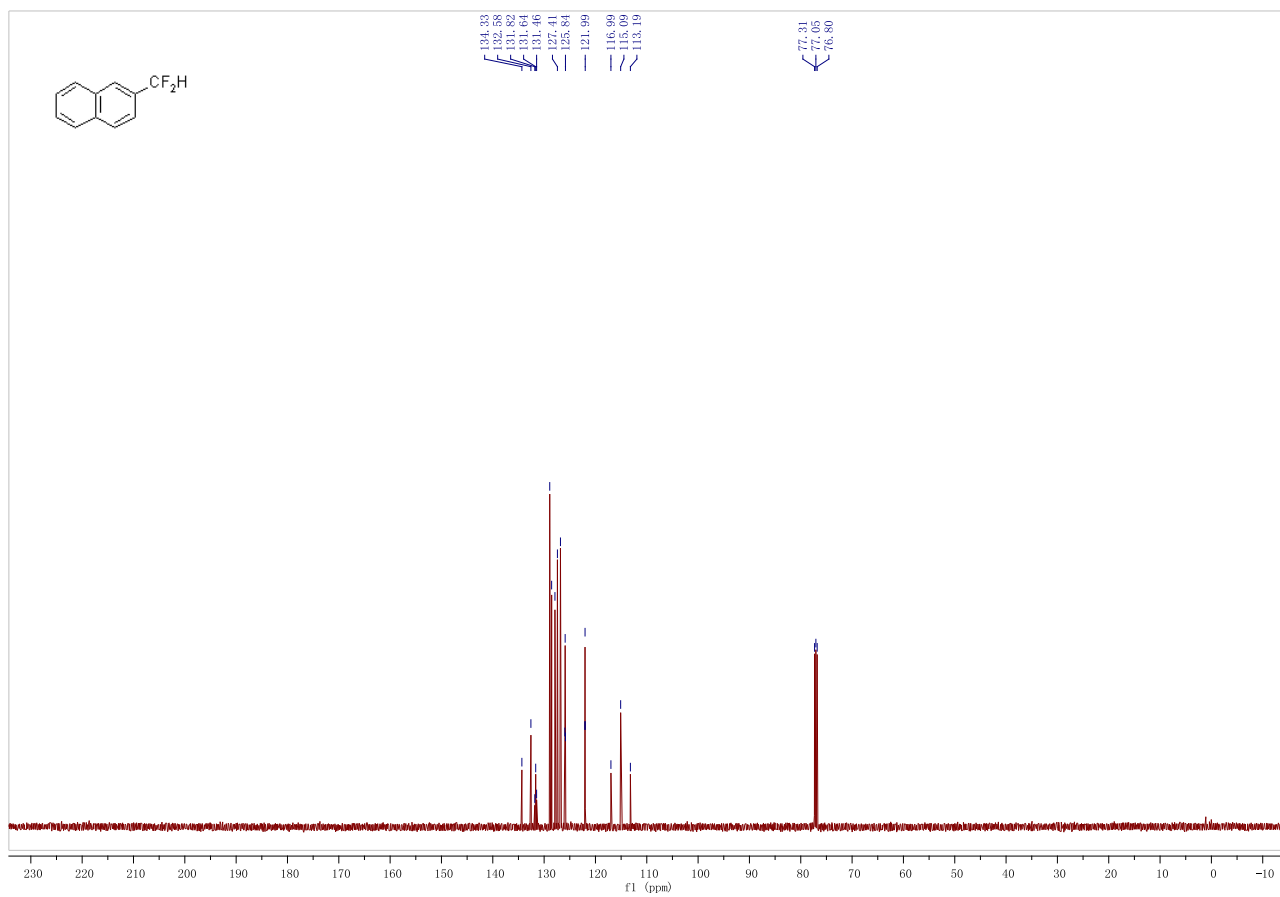

**9-(Difluoromethyl)phenanthrene (17).**

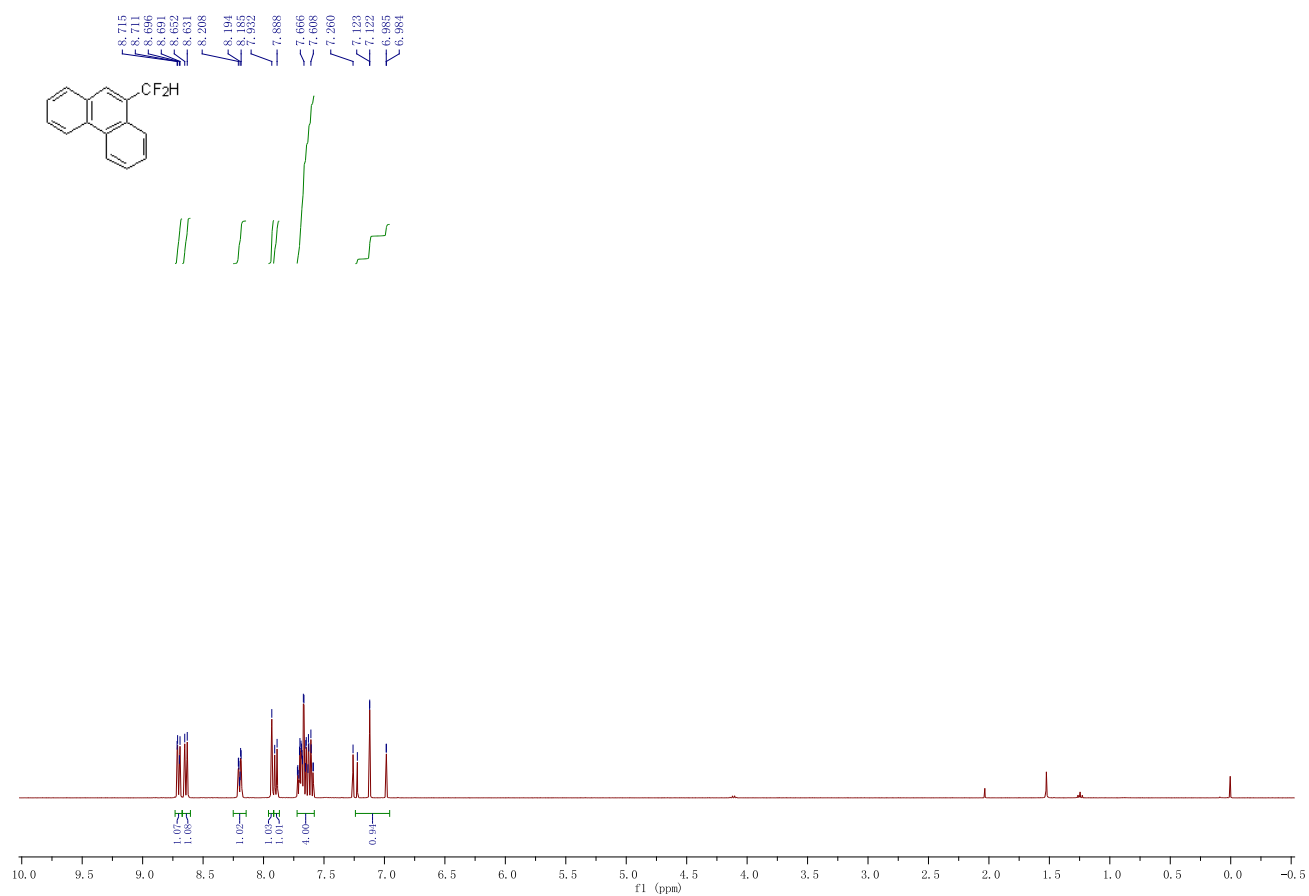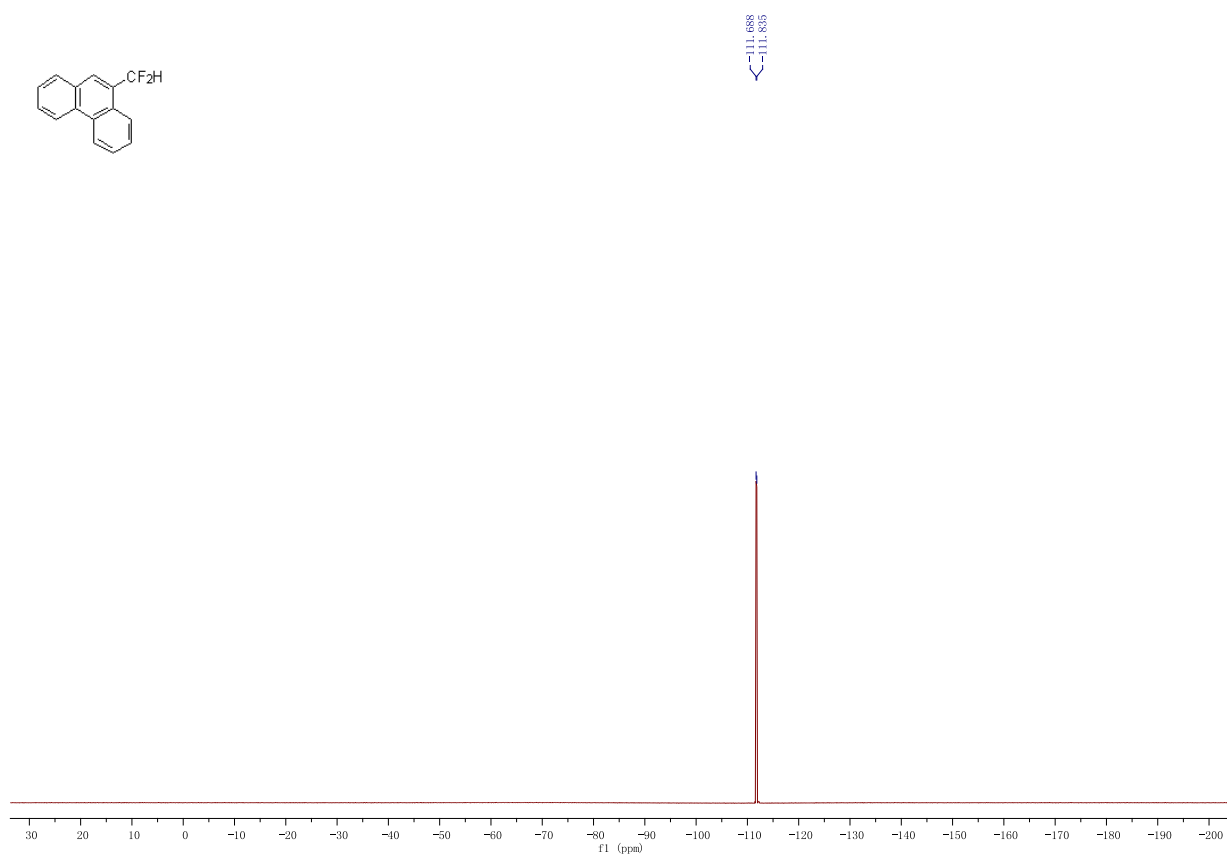

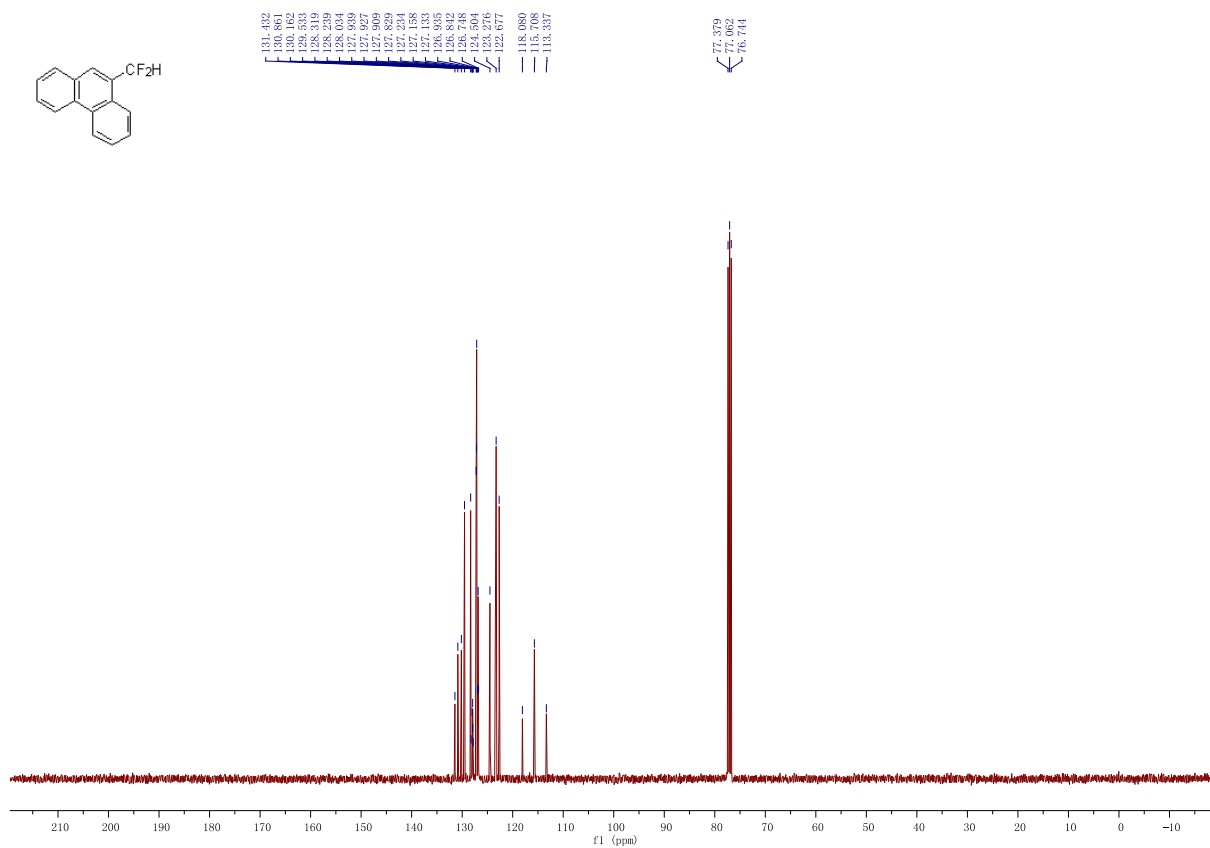

#### 4-(Difluoromethyl)benzaldehyde (18).

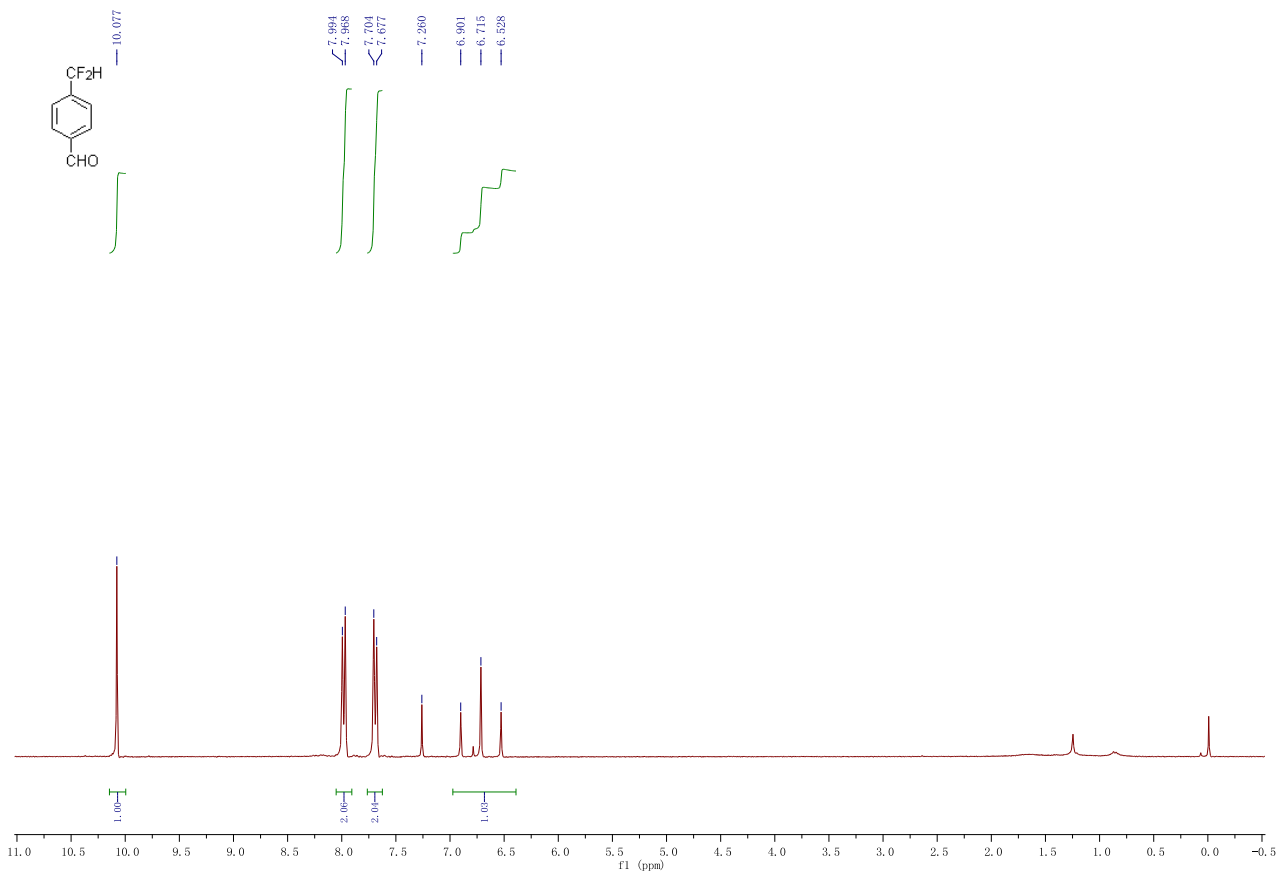

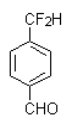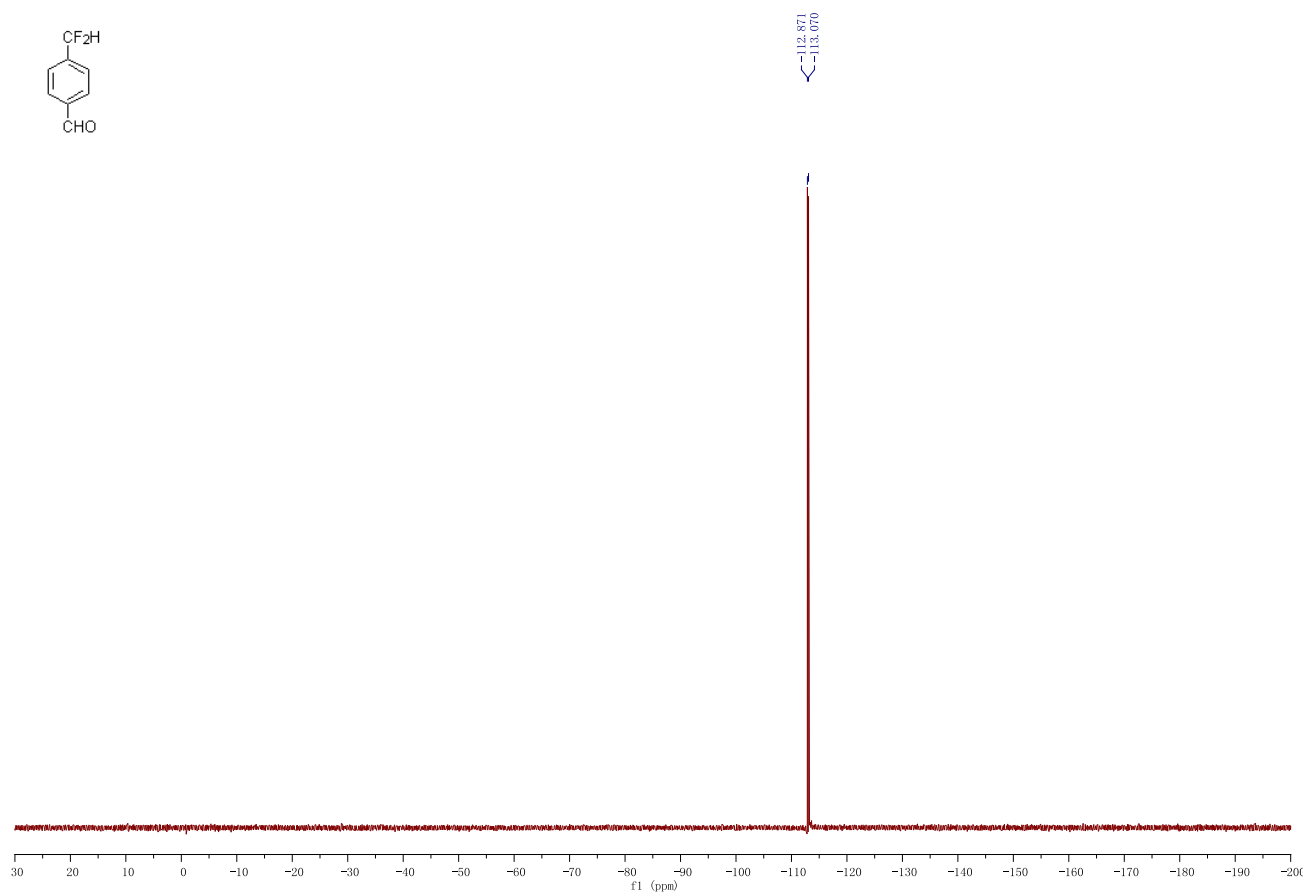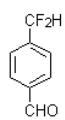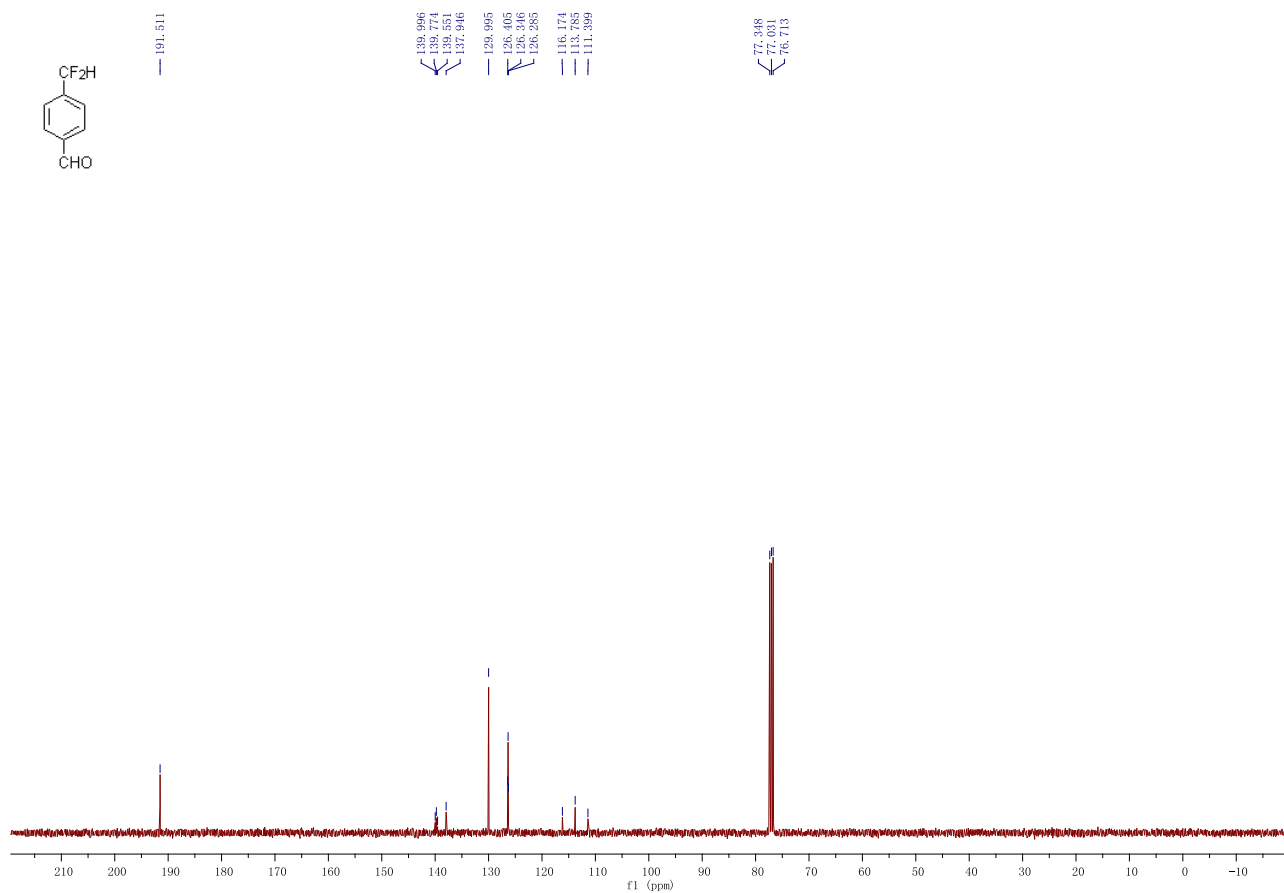



### 3-(Difluoromethyl)benzaldehyde (19).

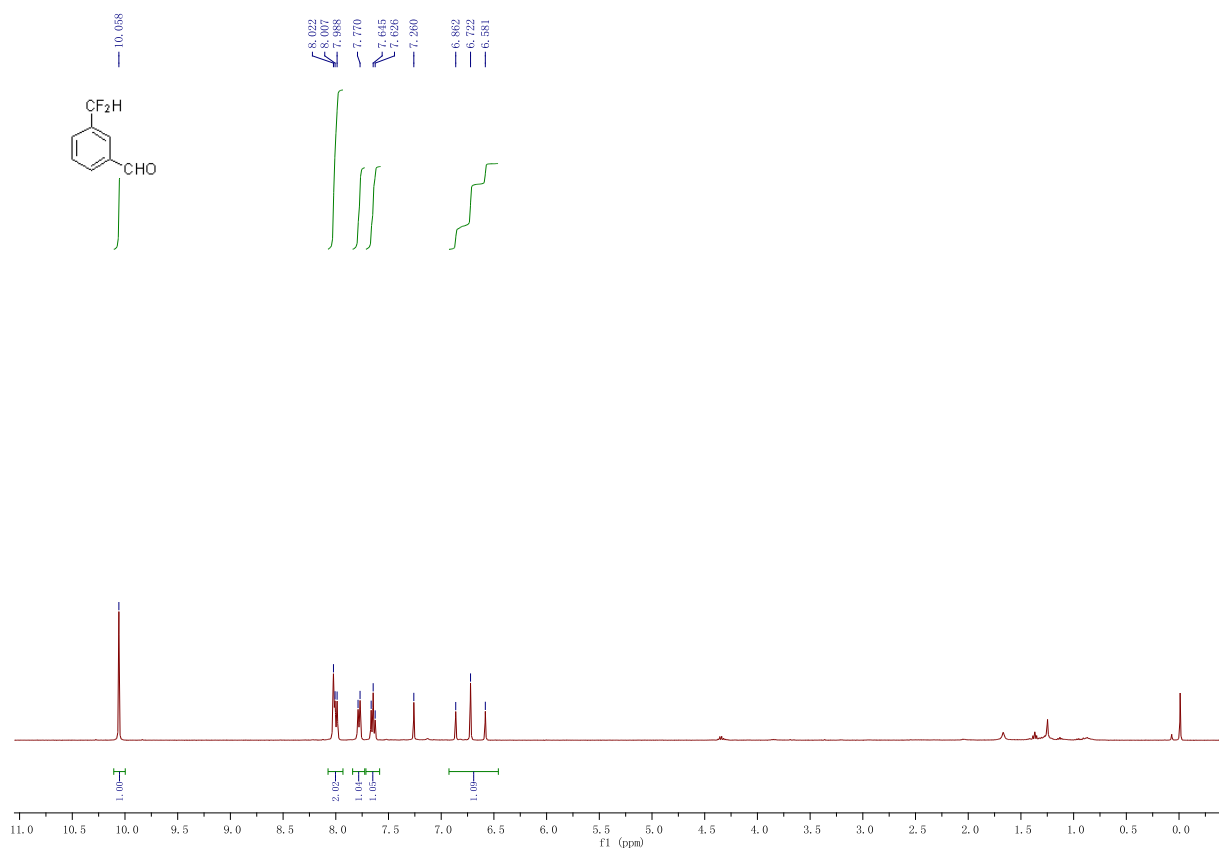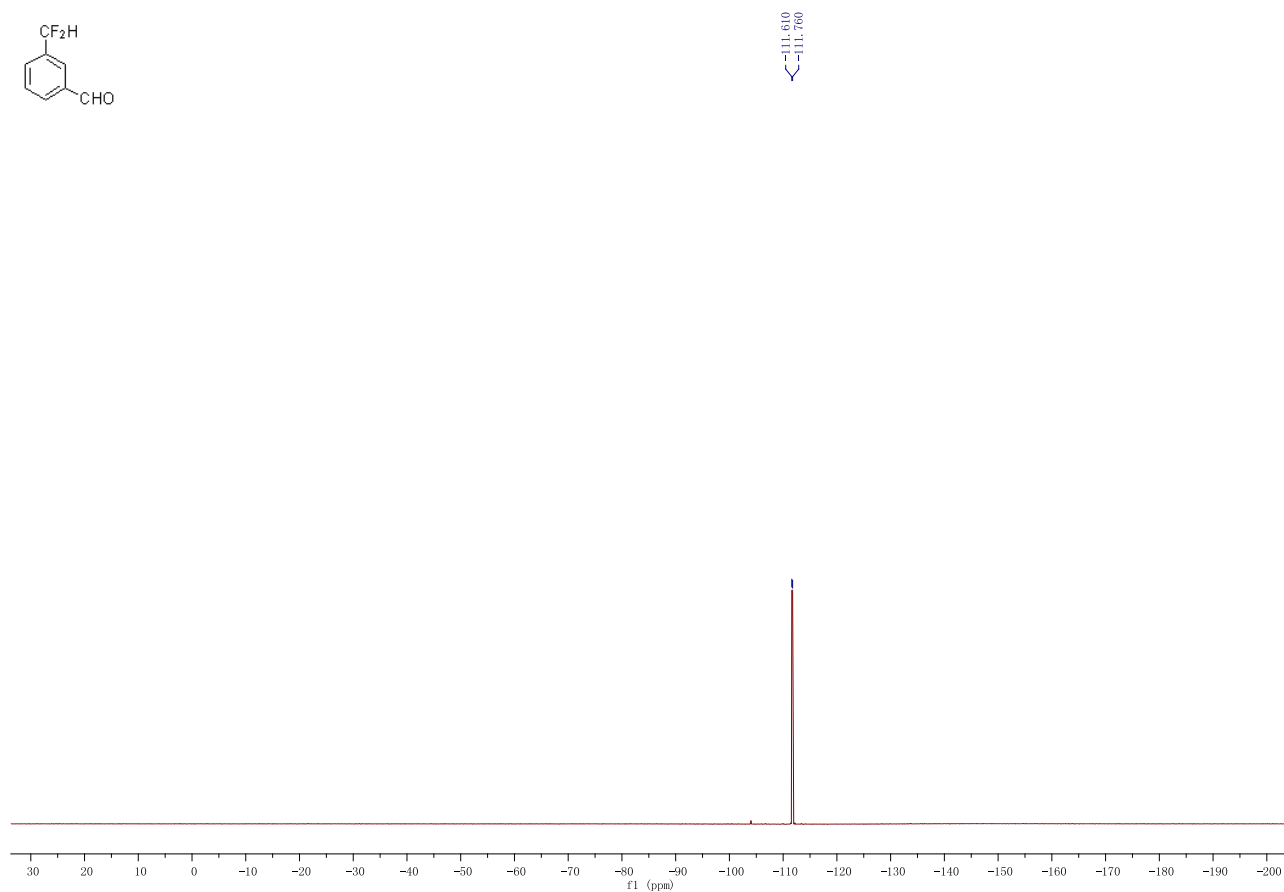

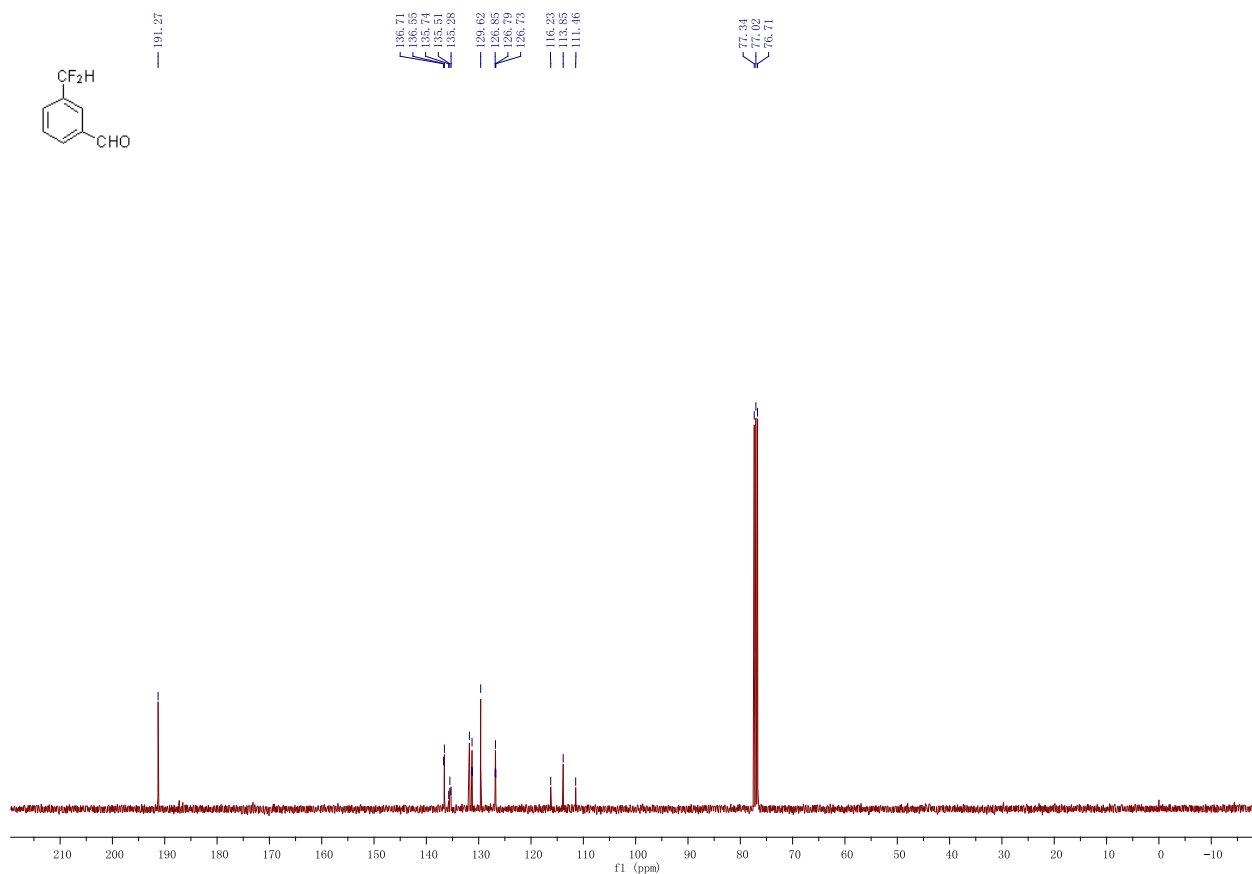

## 2-(Difluoromethyl)benzaldehyde (20).

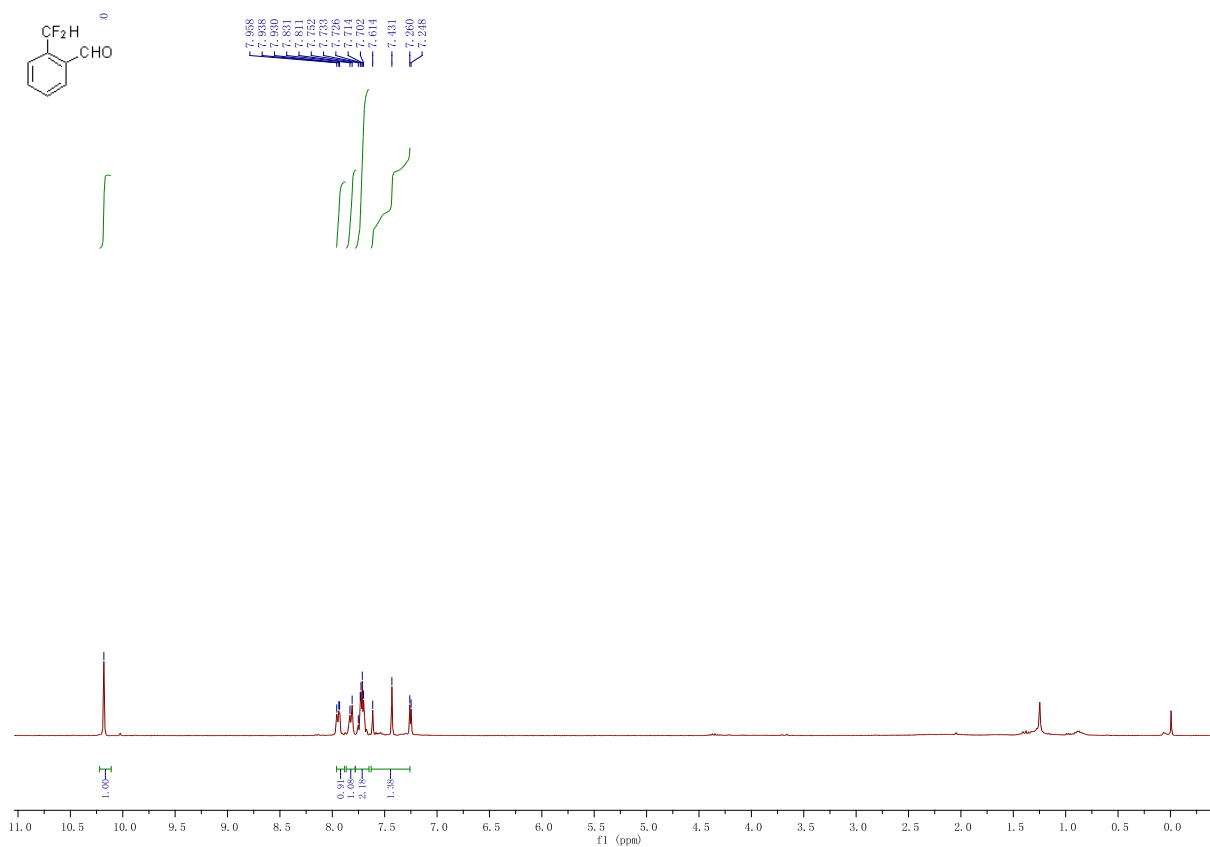

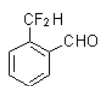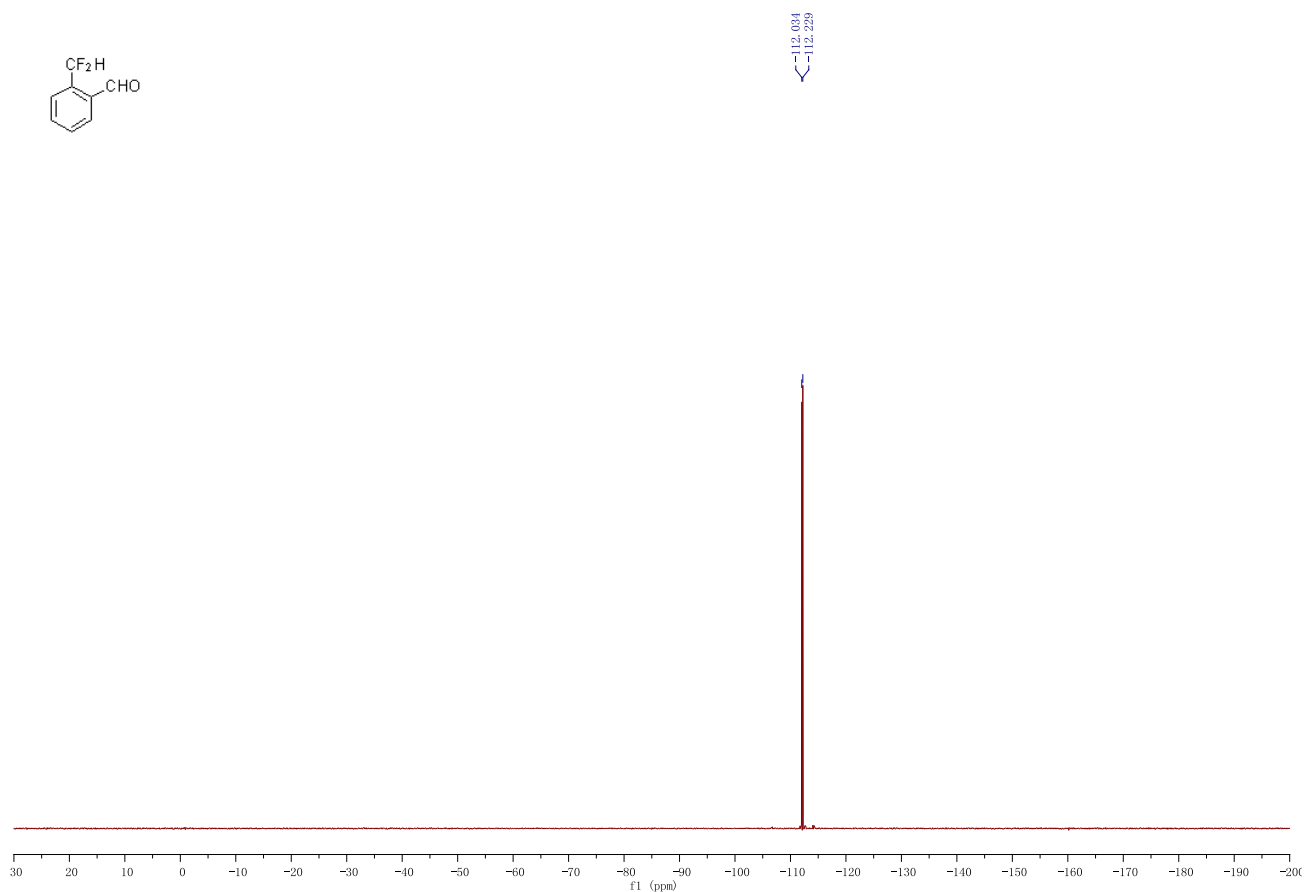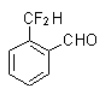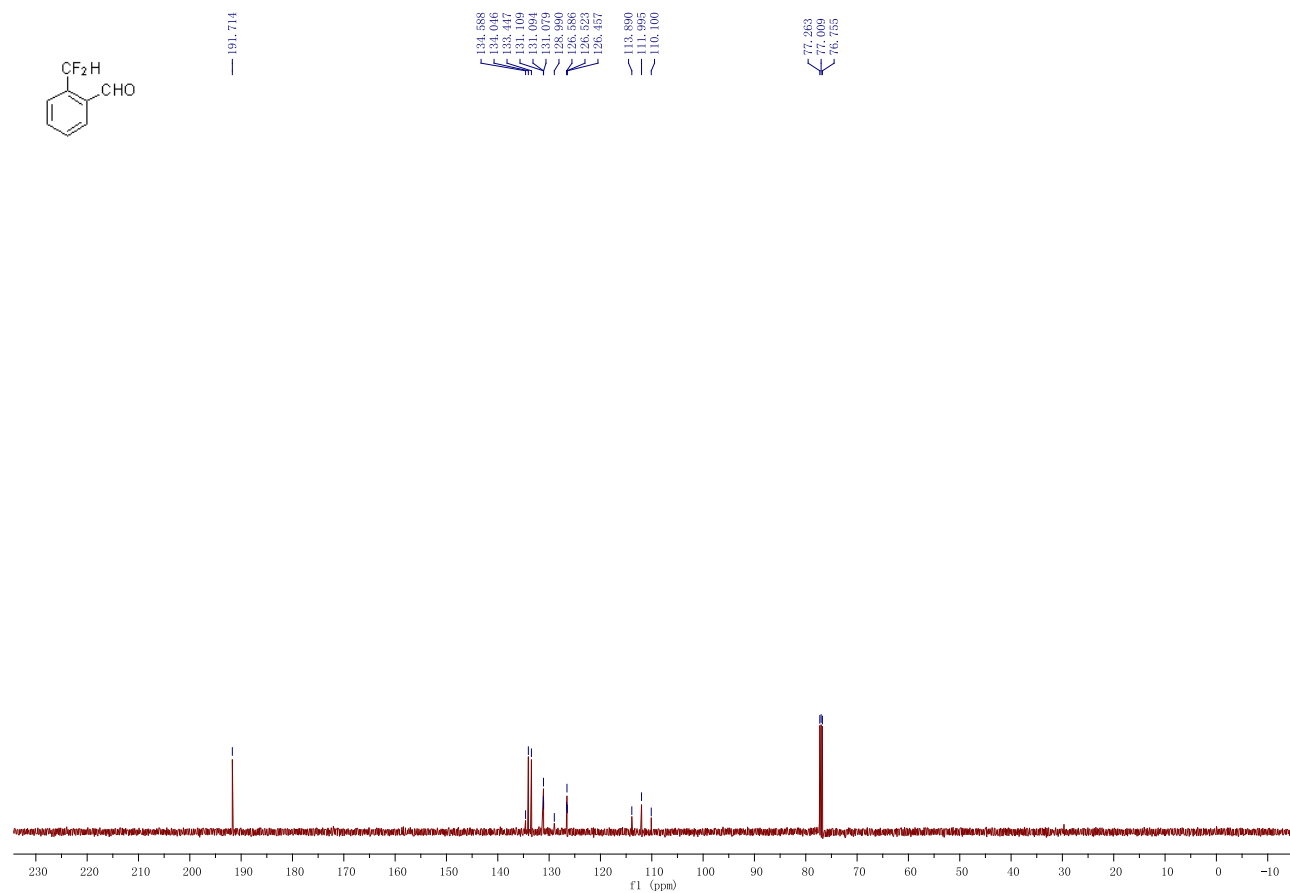

# **Ethyl 4-(difluoromethyl)benzoate (21).**

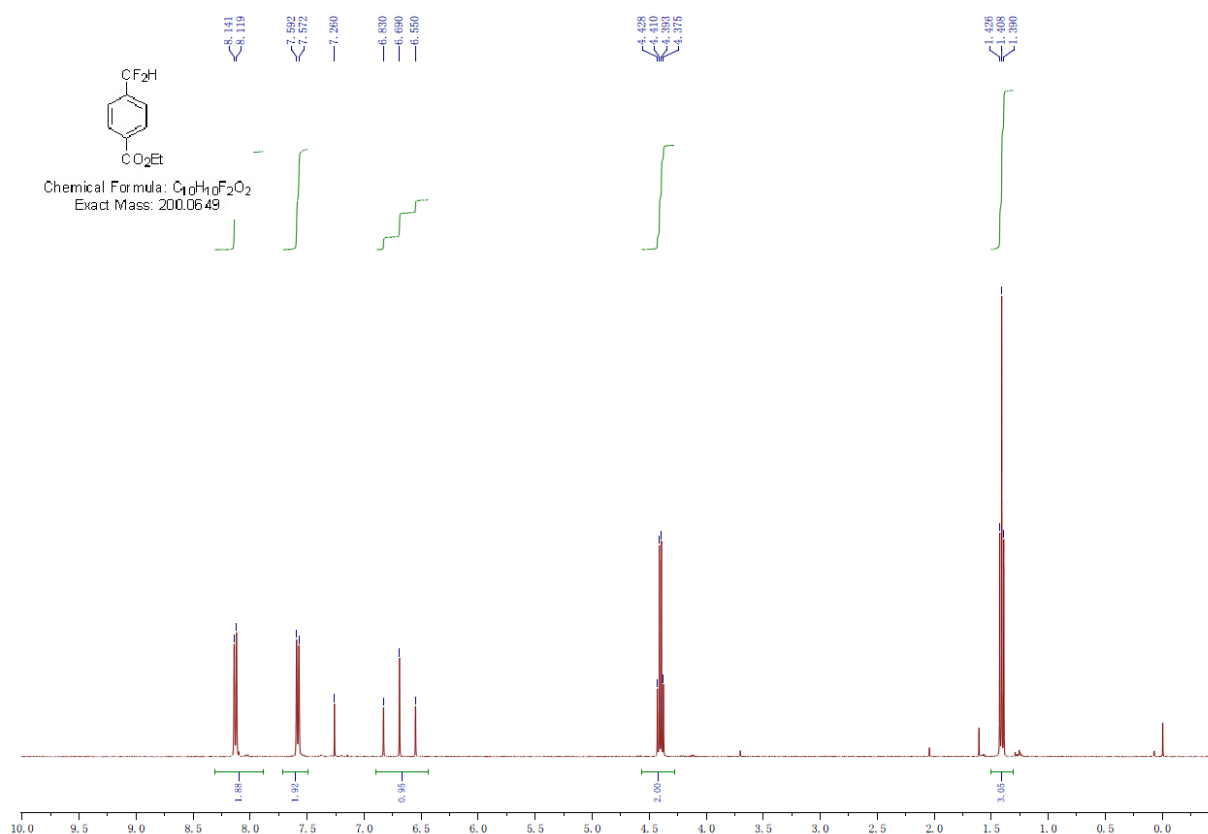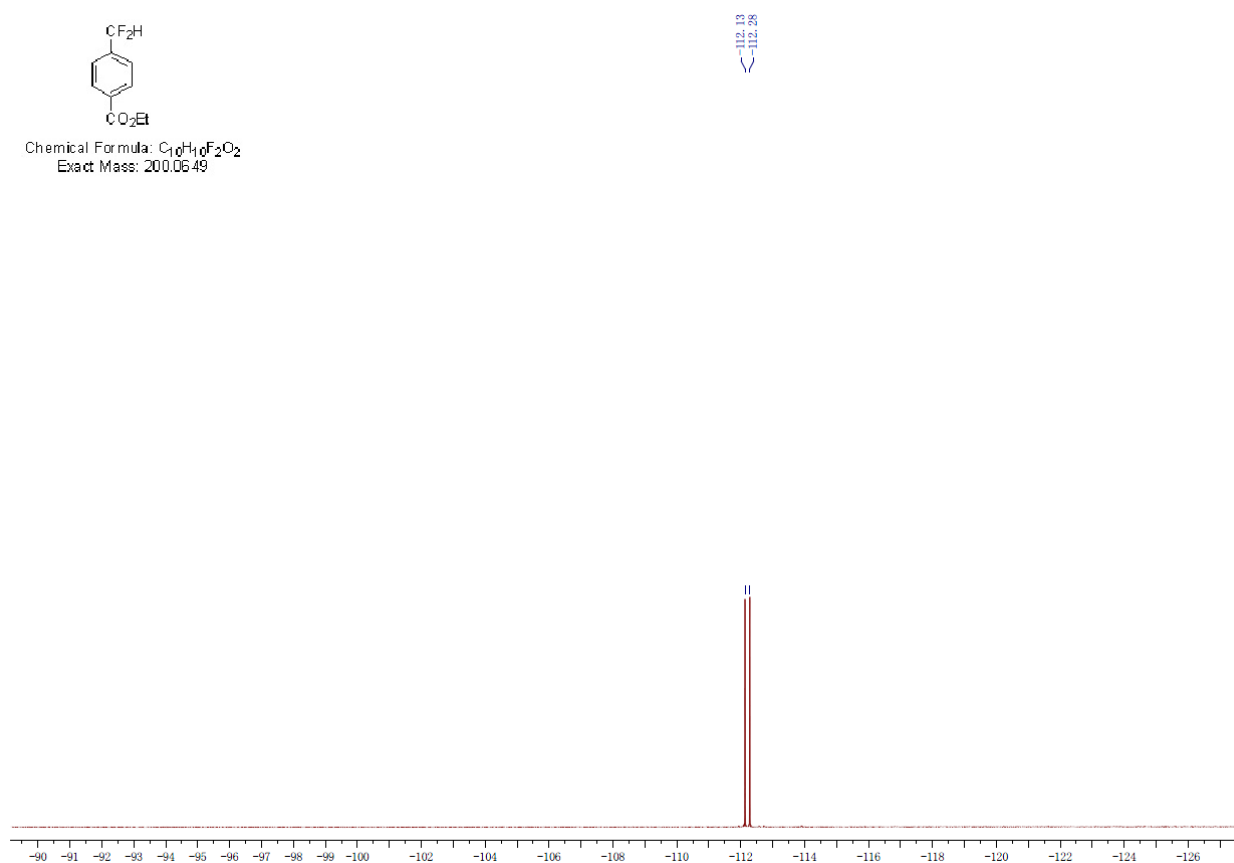

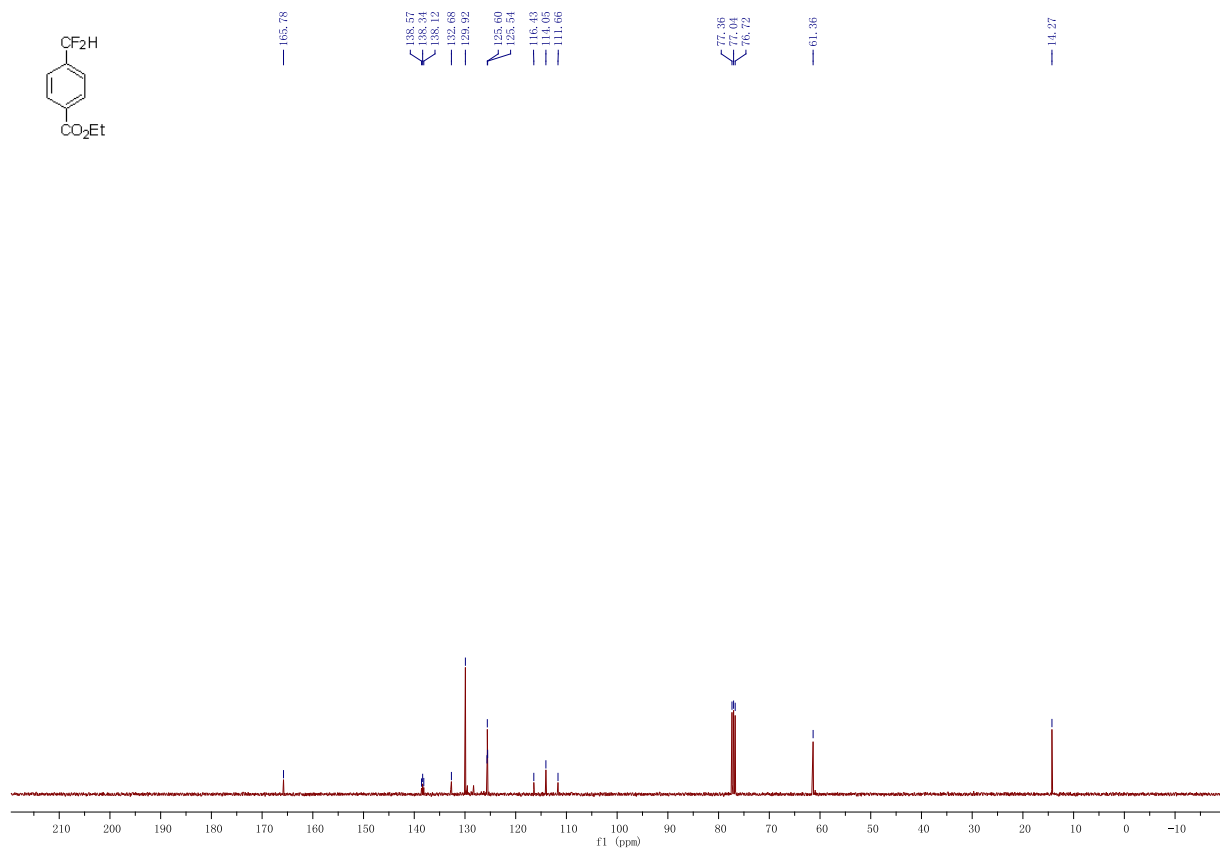

### Ethyl 3-(difluoromethyl)benzoate (22).

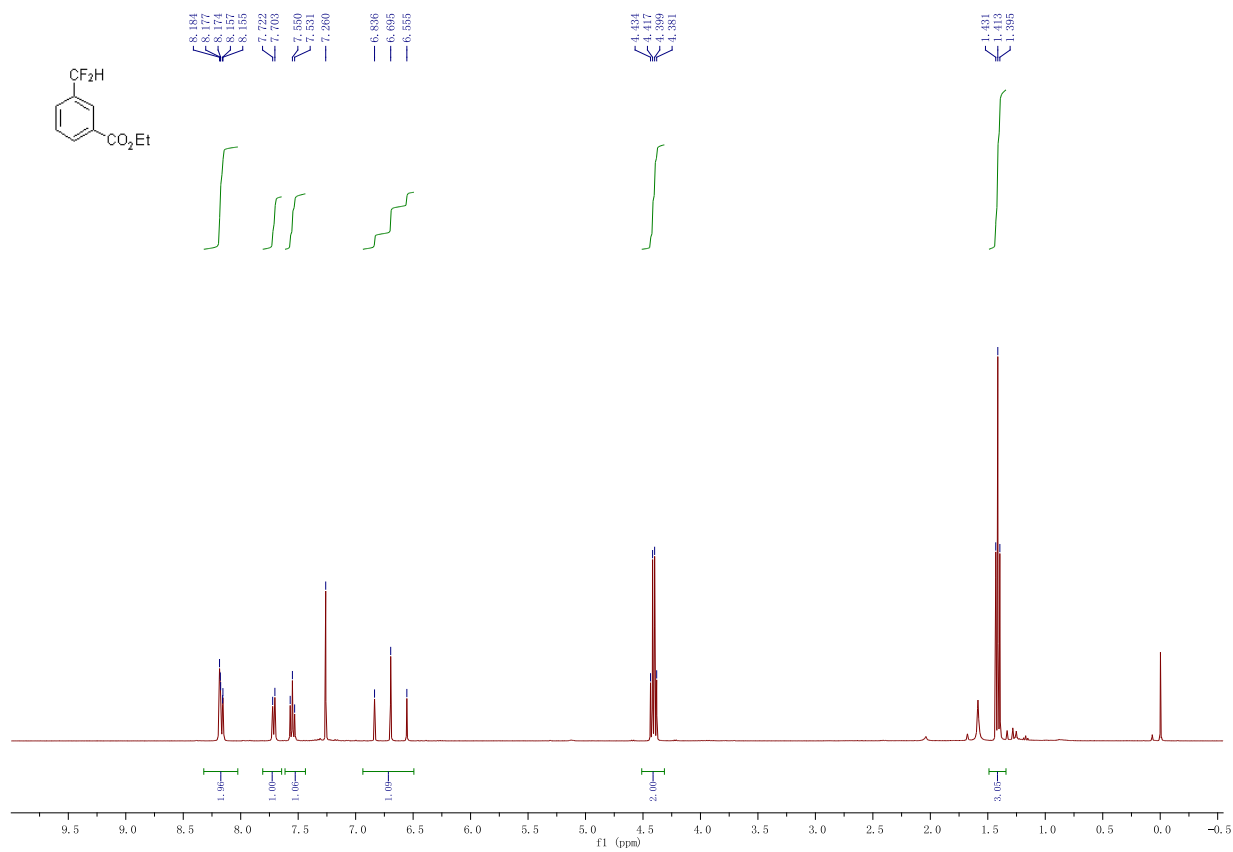

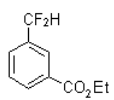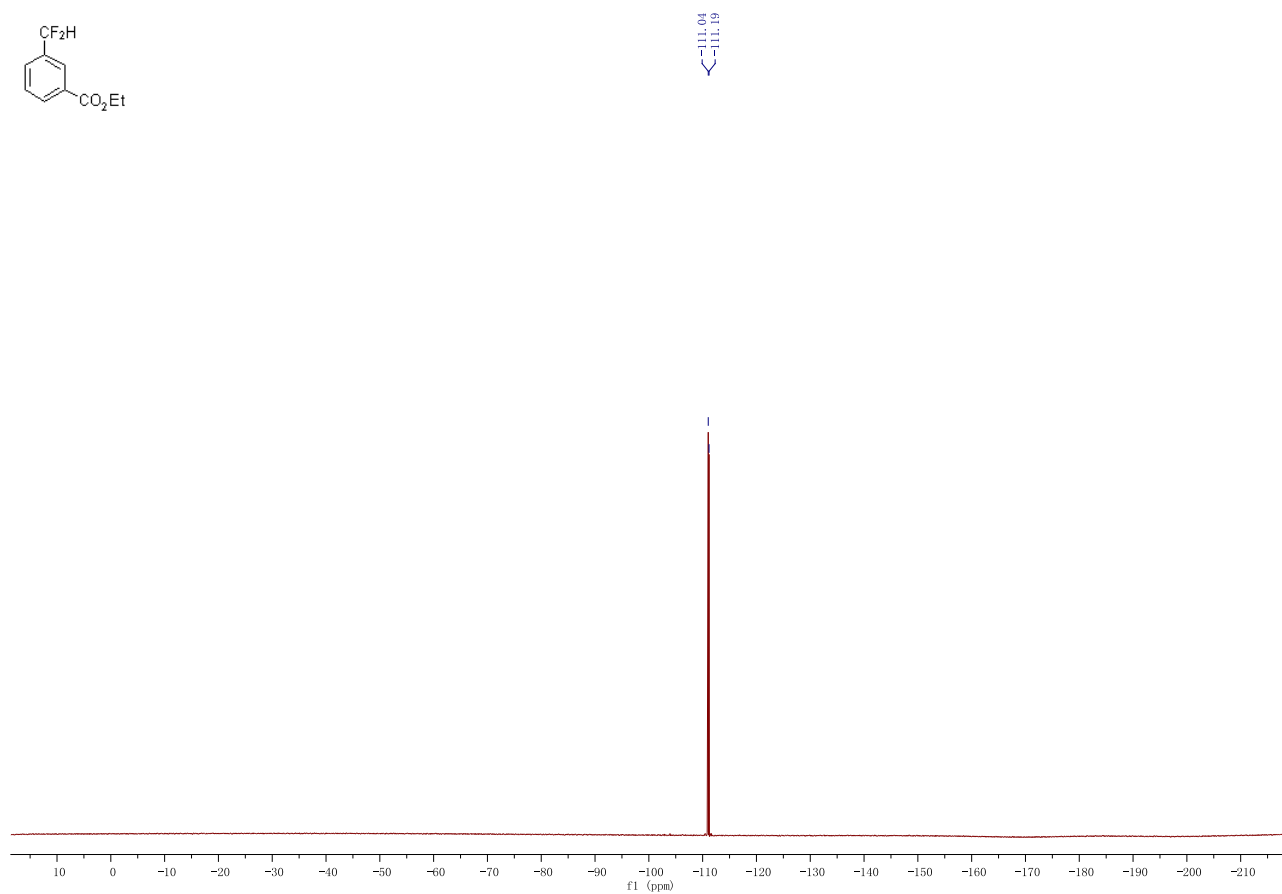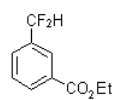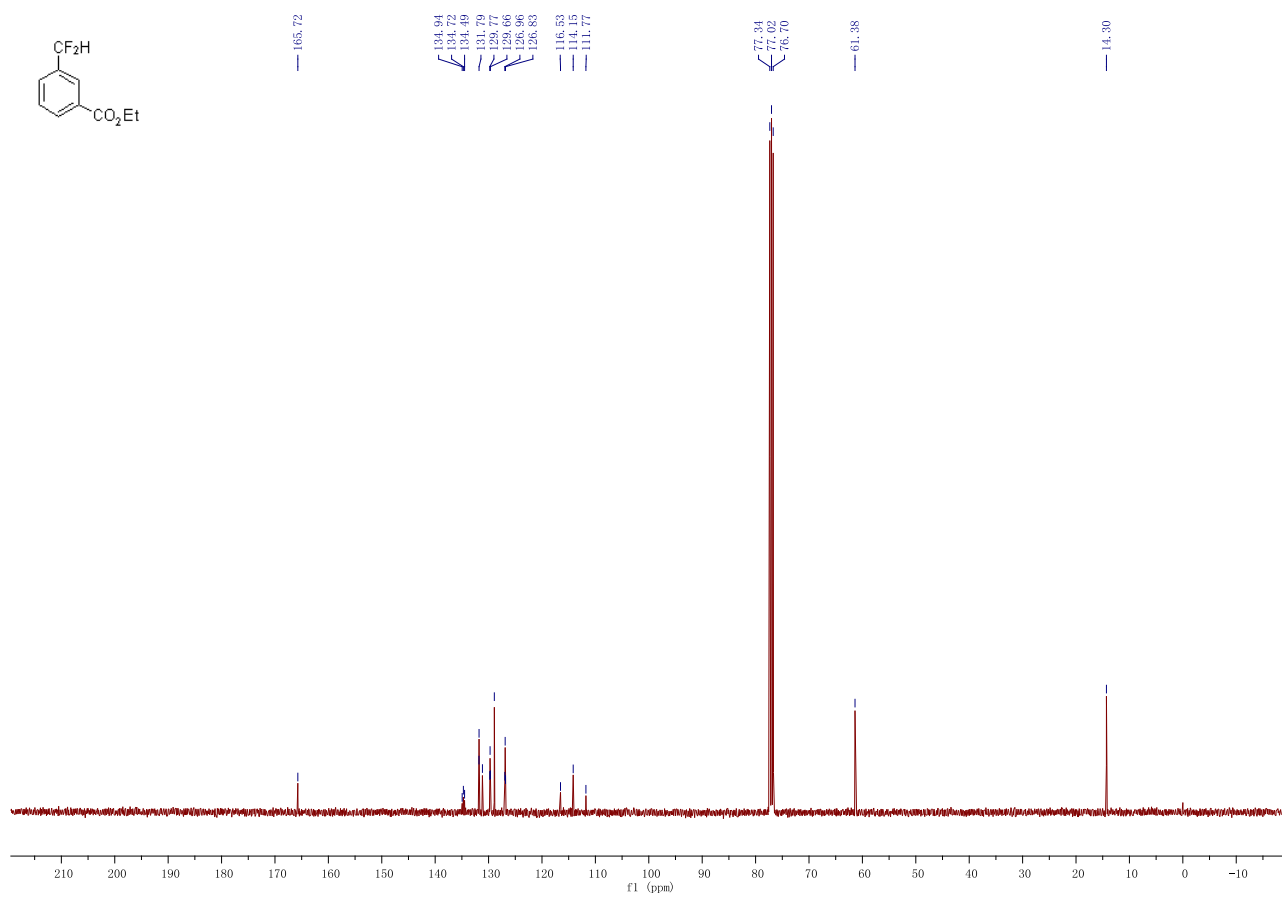

# 1-(4-(Difluoromethyl)phenyl)ethanone (23).

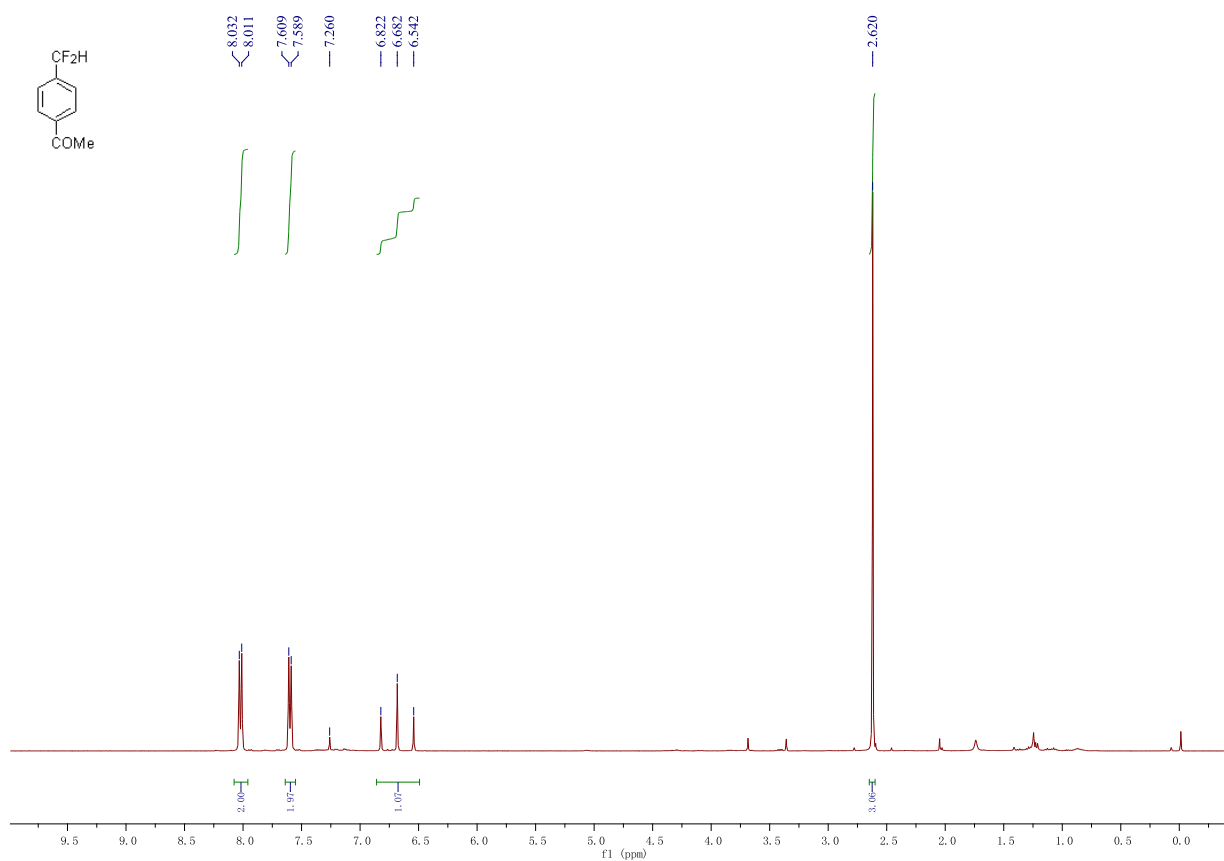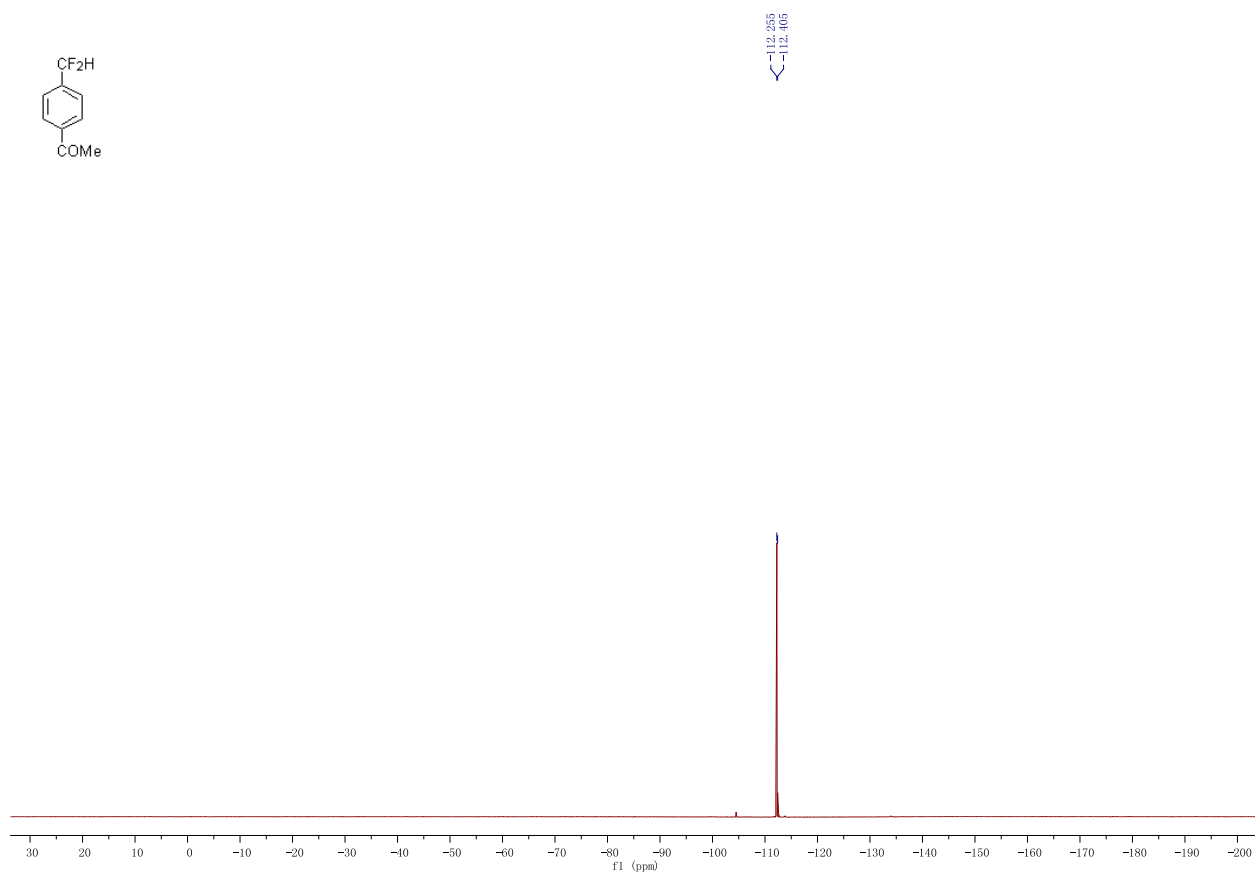

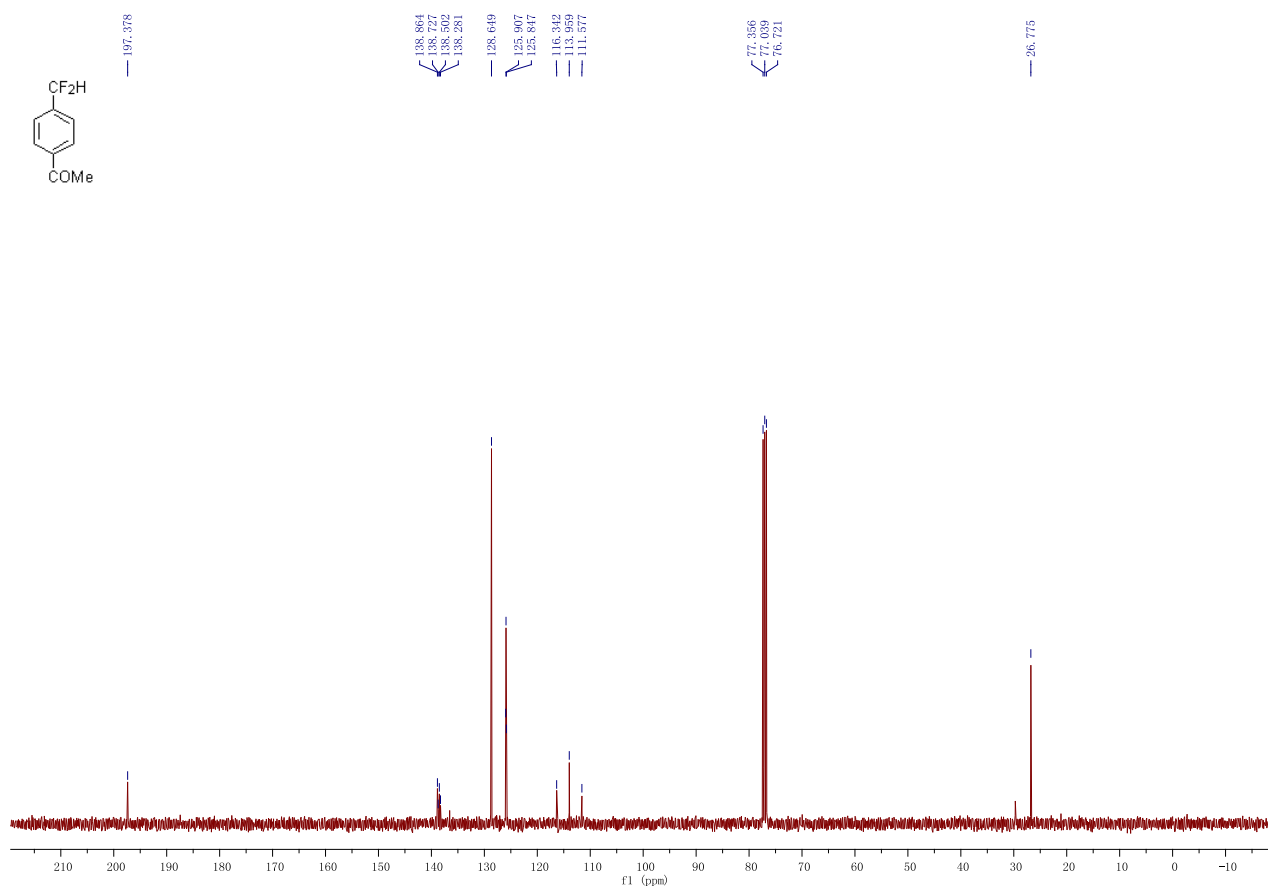

# 1-(3-(Difluoromethyl)phenyl)ethanone (24).

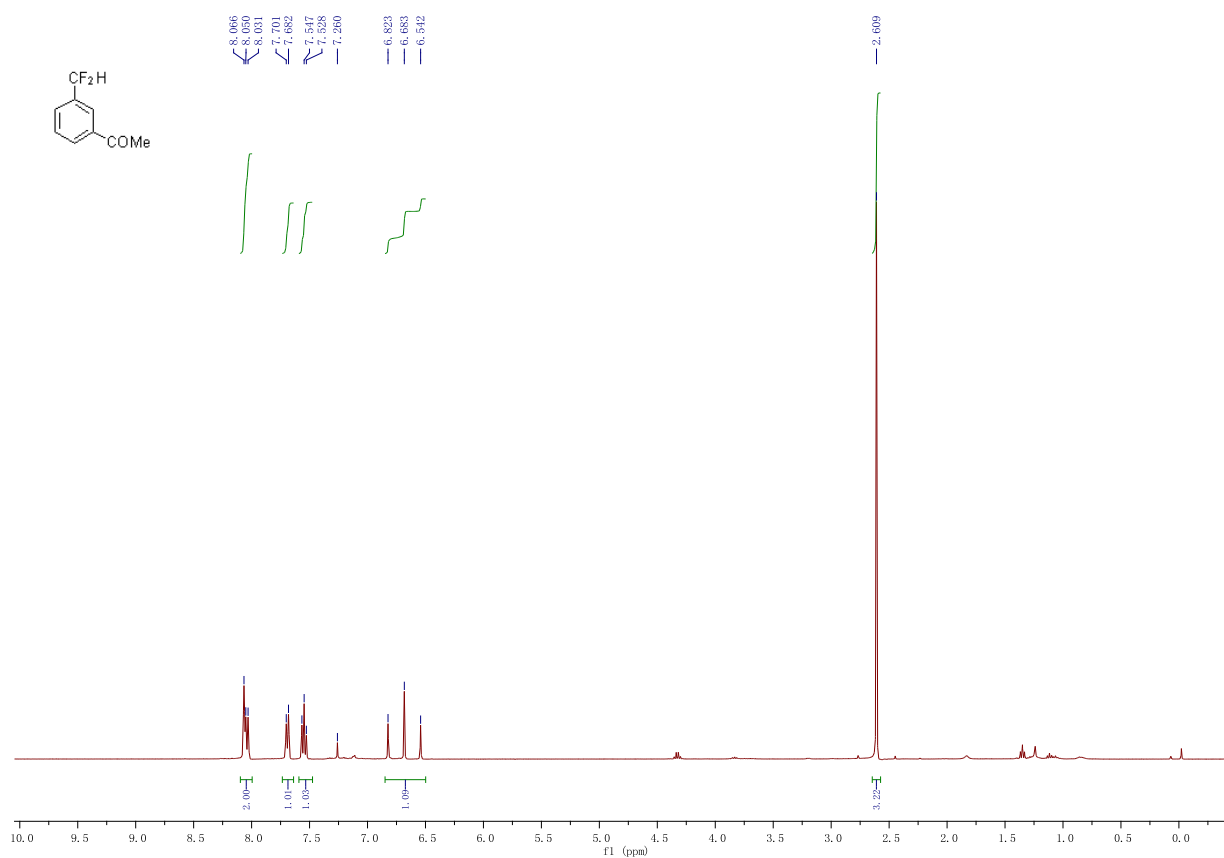



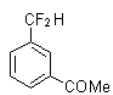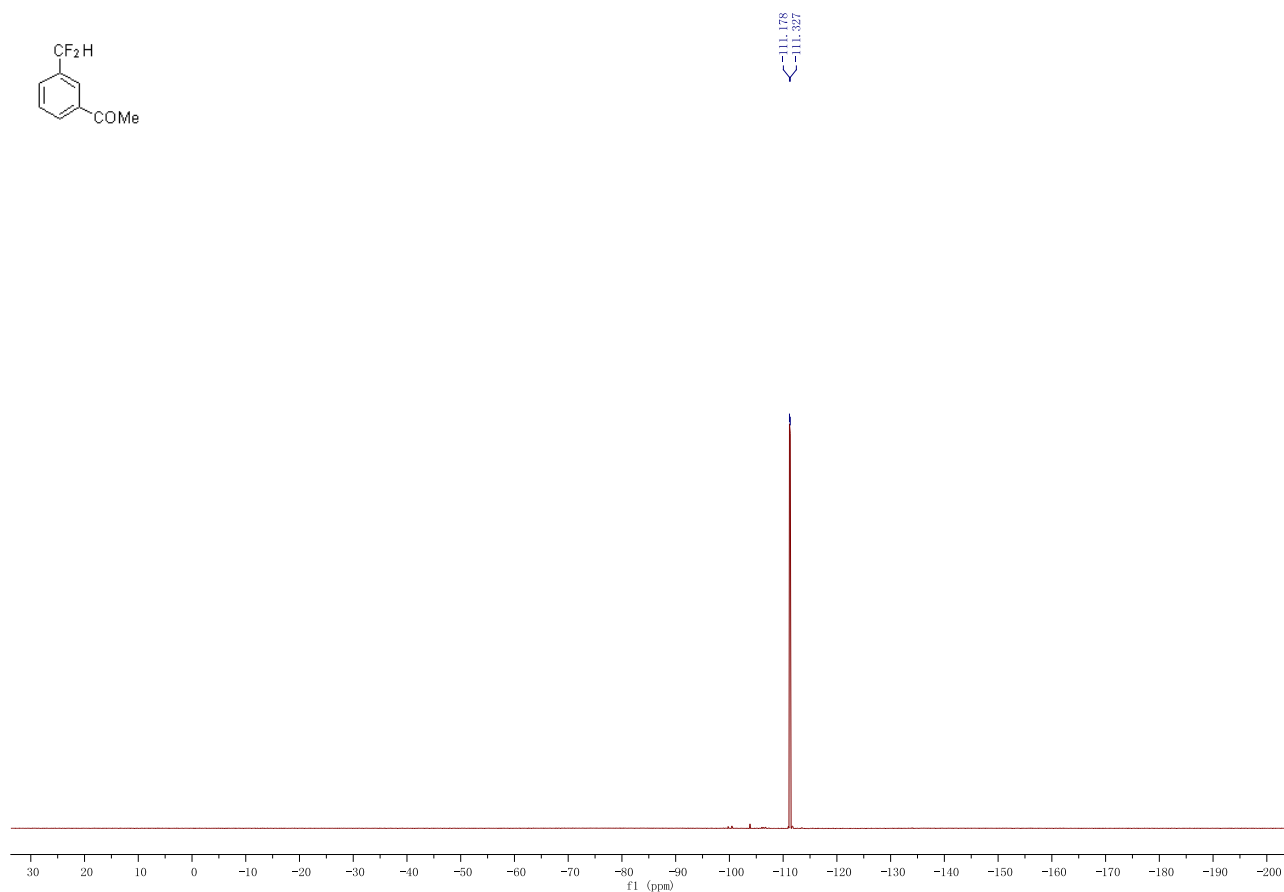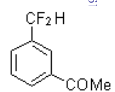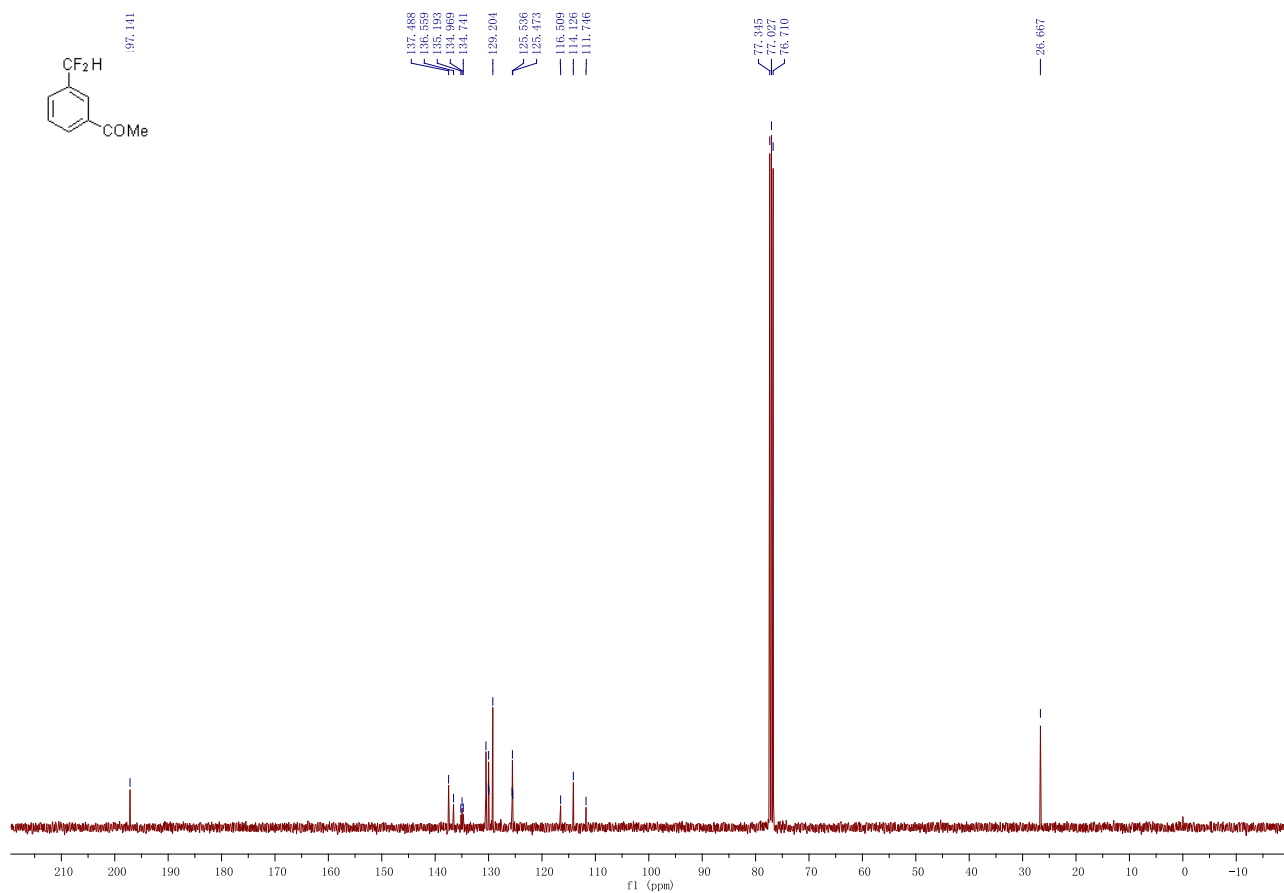

### 3-(Difluoromethyl)benzonitrile (25).

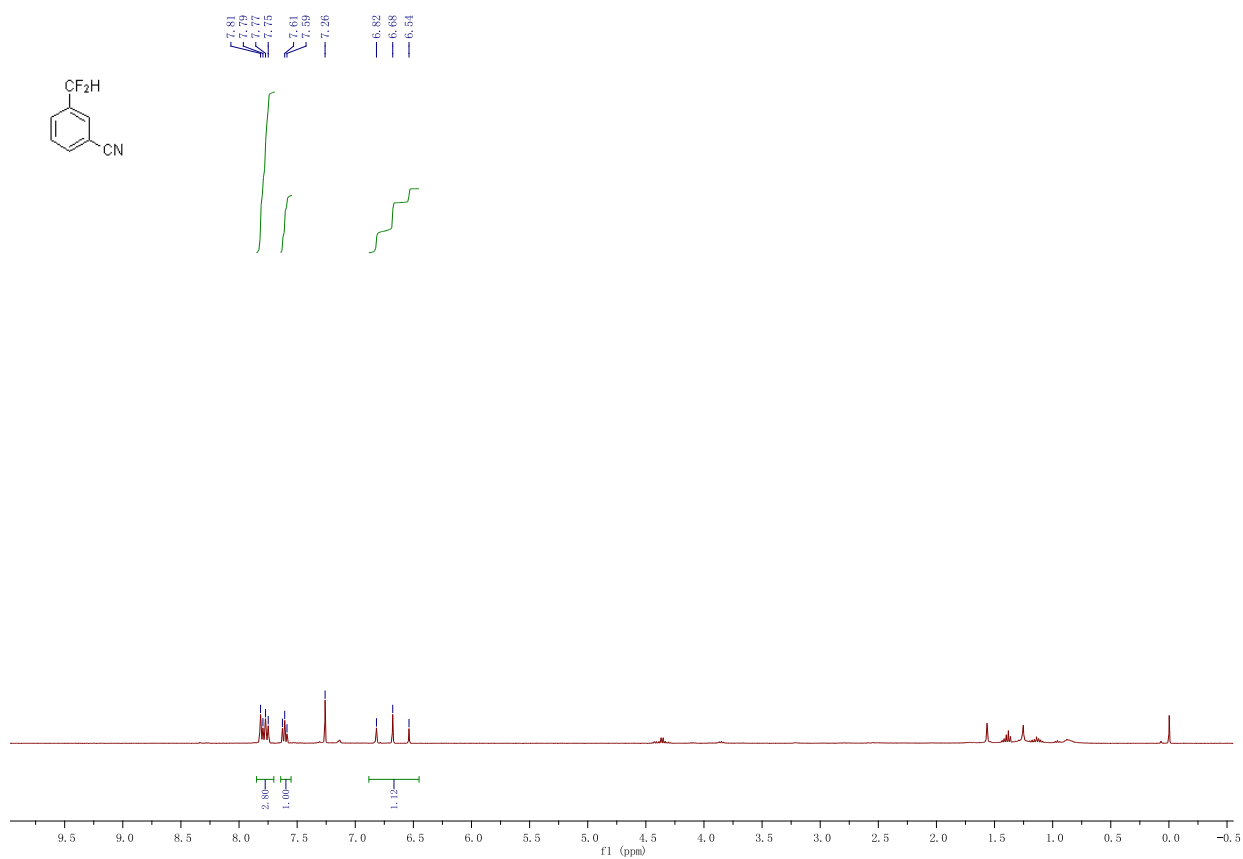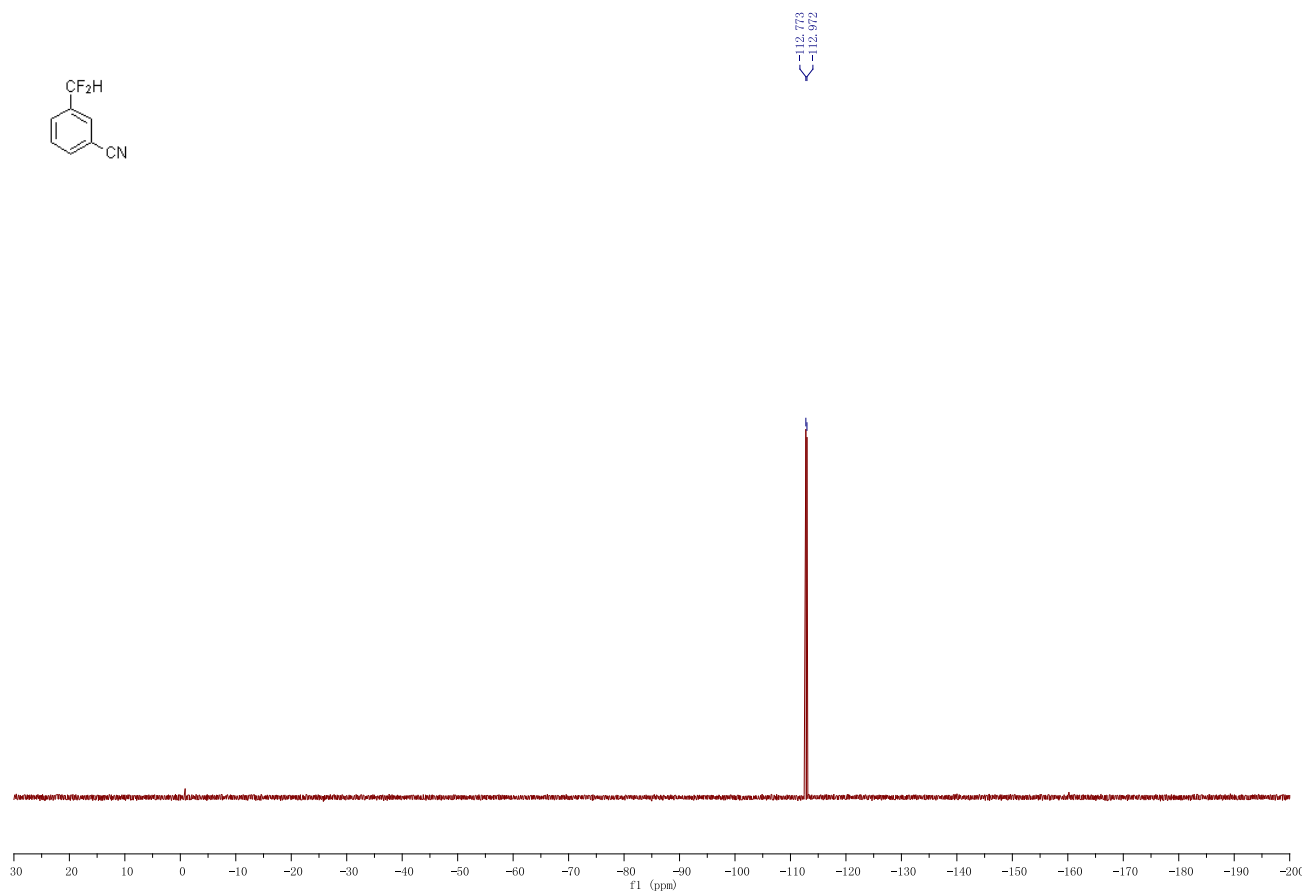

**1-(Difluoromethyl)-4-(trifluoromethyl)benzene (26).** (Due to the low boil point of 26, a crude  $^{19}\text{F}$  NMR was provided)

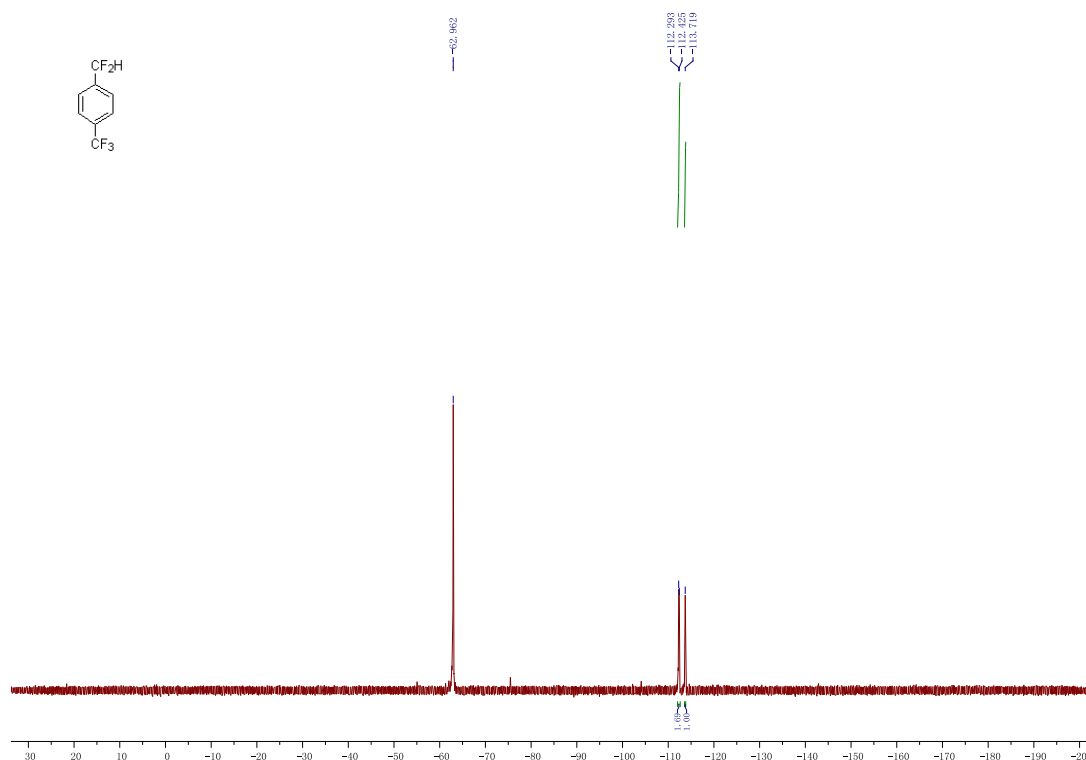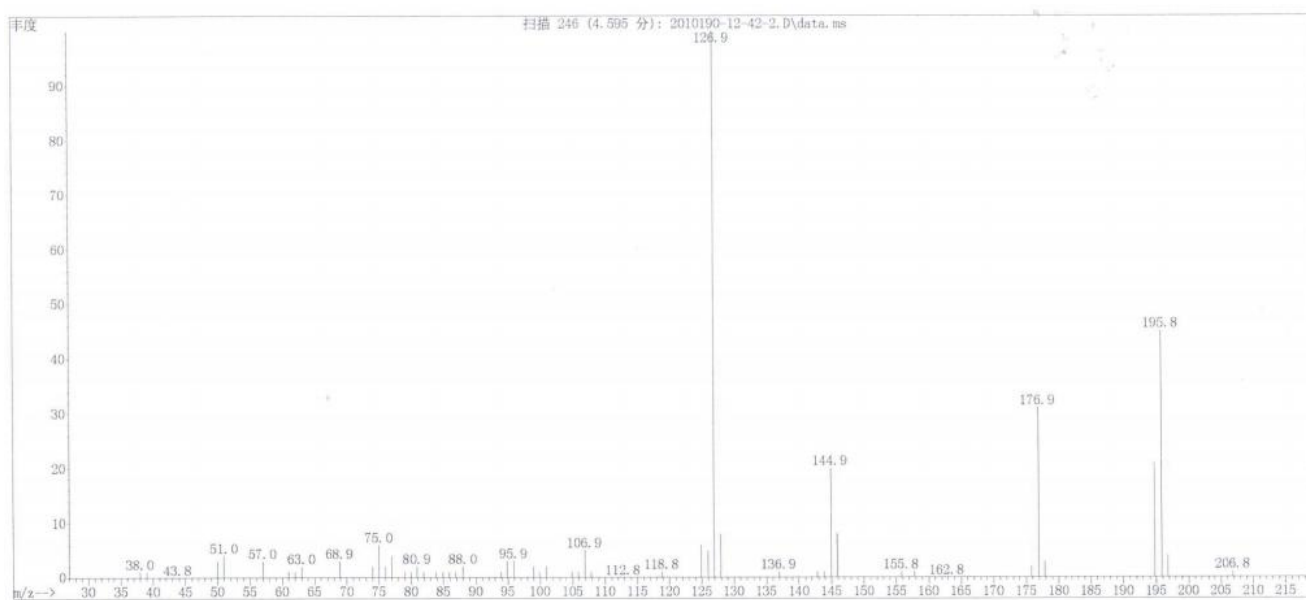

**1-(Difluoromethyl)-3-(trifluoromethyl)benzene (27) (Due to the low boil point of 27, a crude  $^{19}\text{F}$  NMR was provided)**

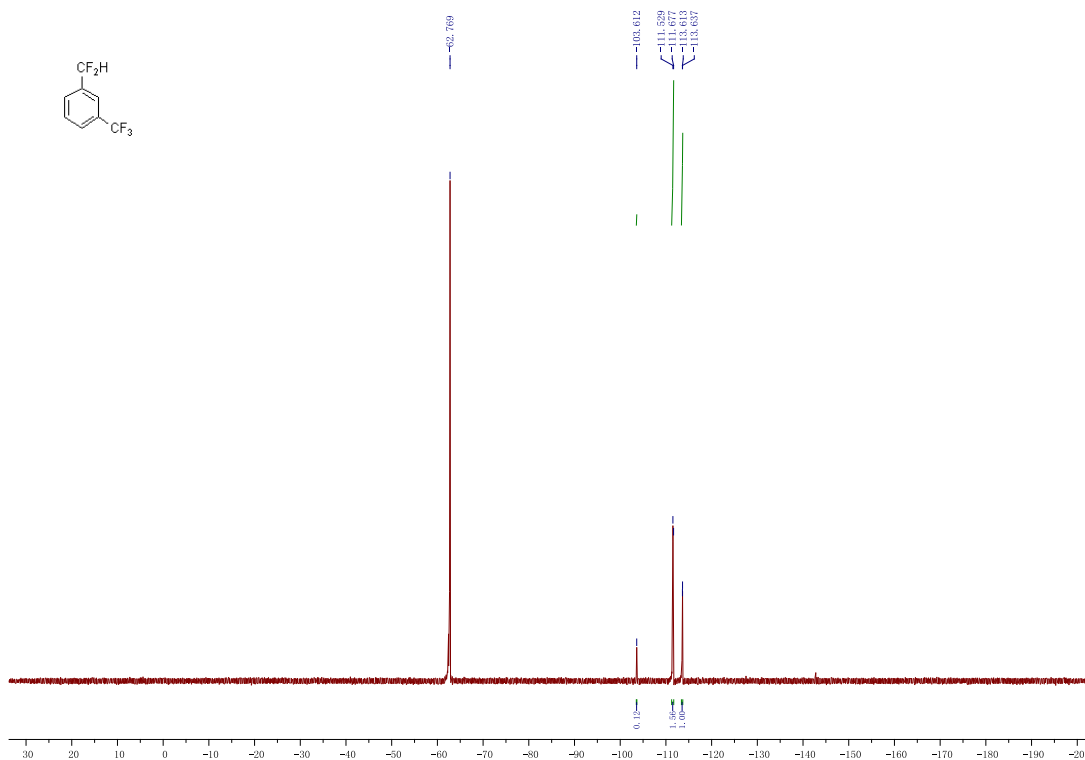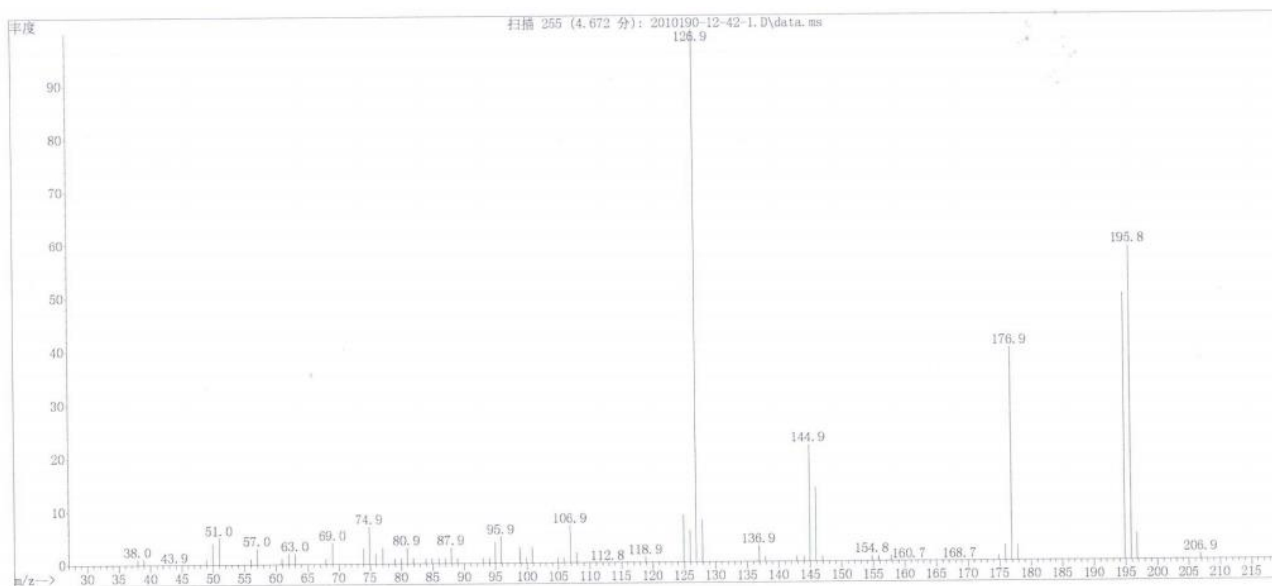

# 1,3-dichloro-5-(difluoromethyl)benzene (28).

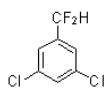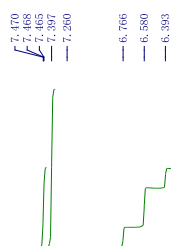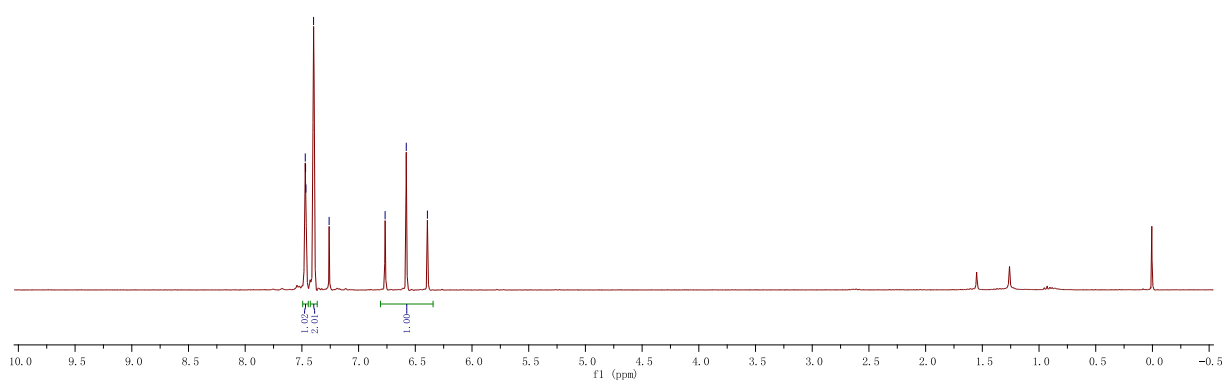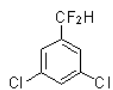

122.87  
122.87

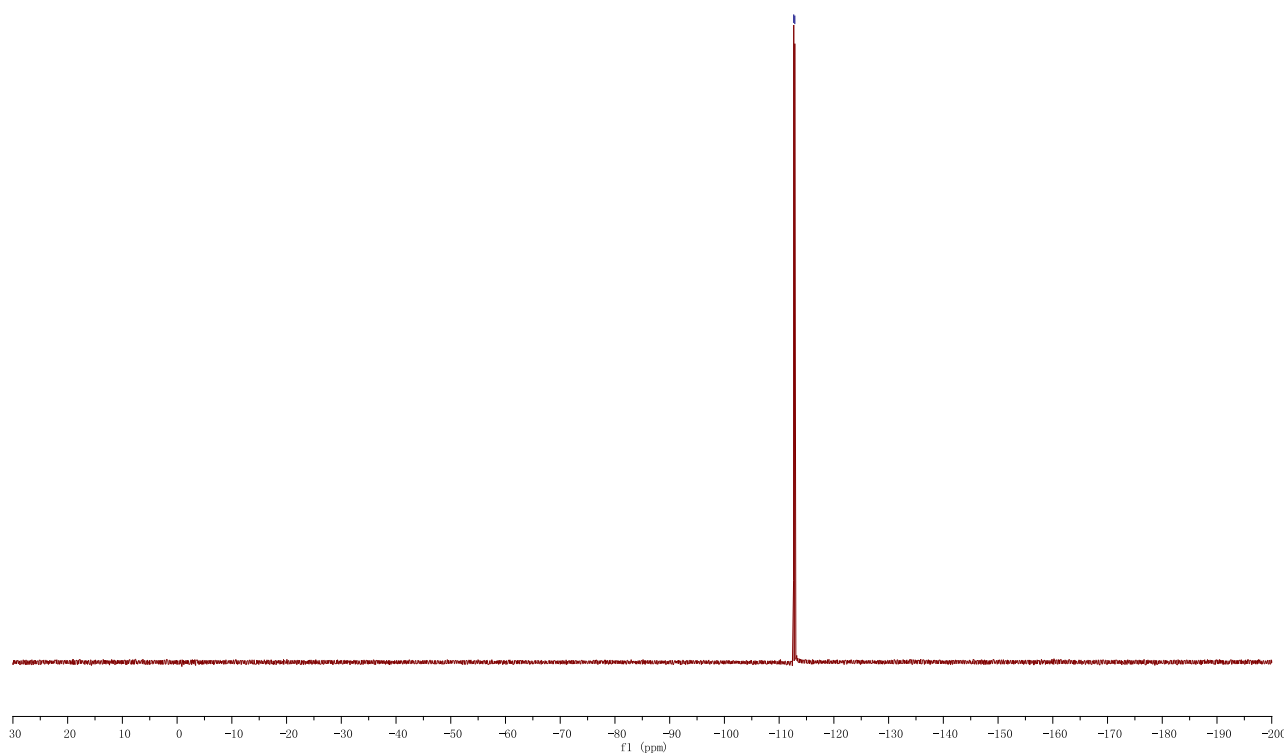

# 1-Bromo-2-(difluoromethyl)benzene (29).

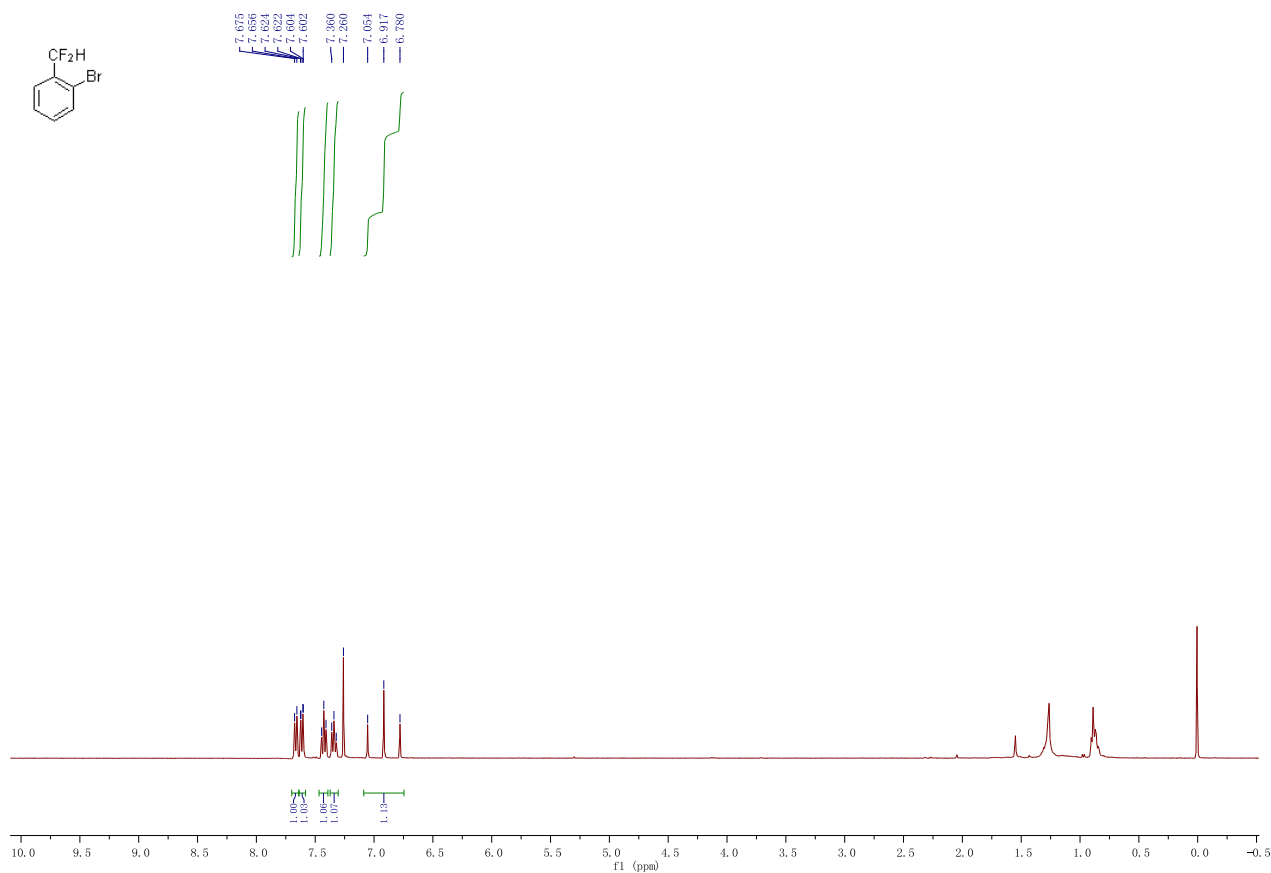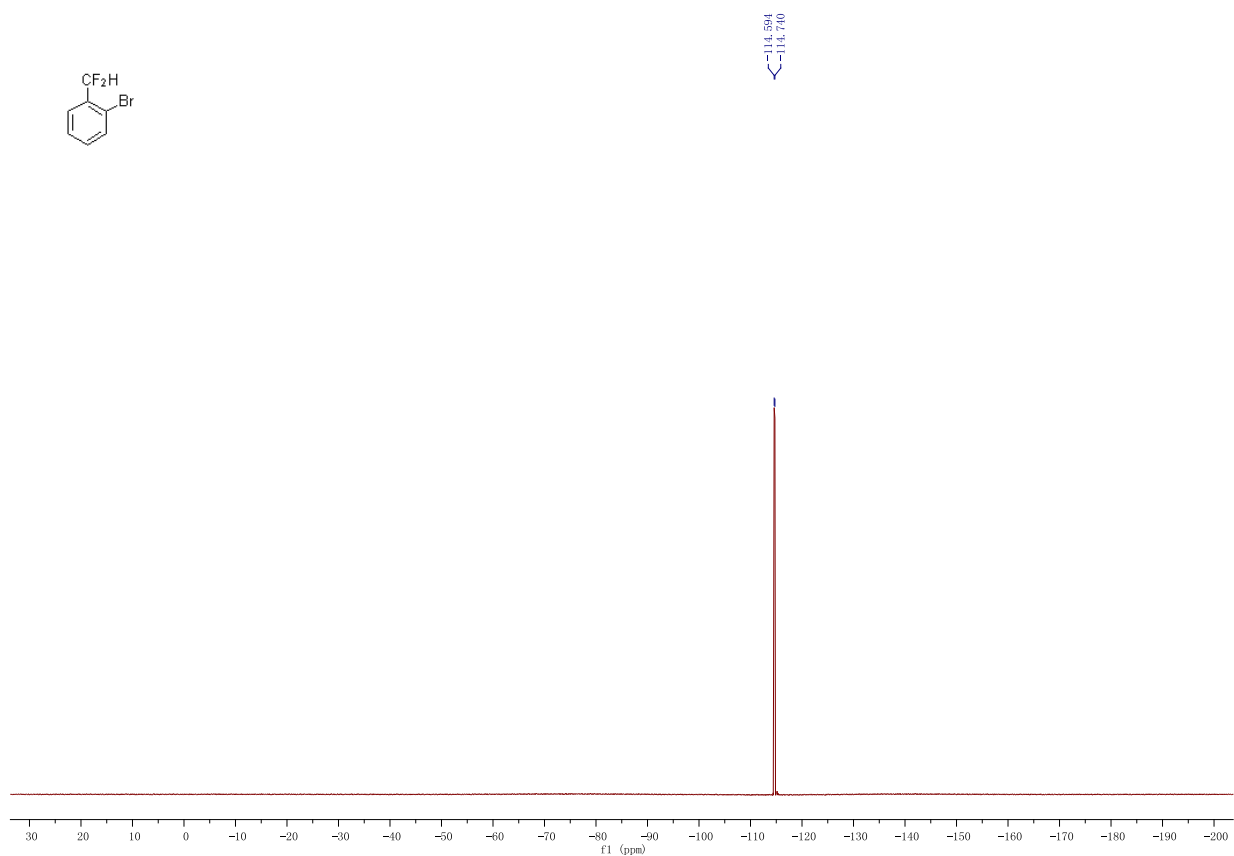

**(4-(Difluoromethyl)phenyl)trimethylsilane (30).**

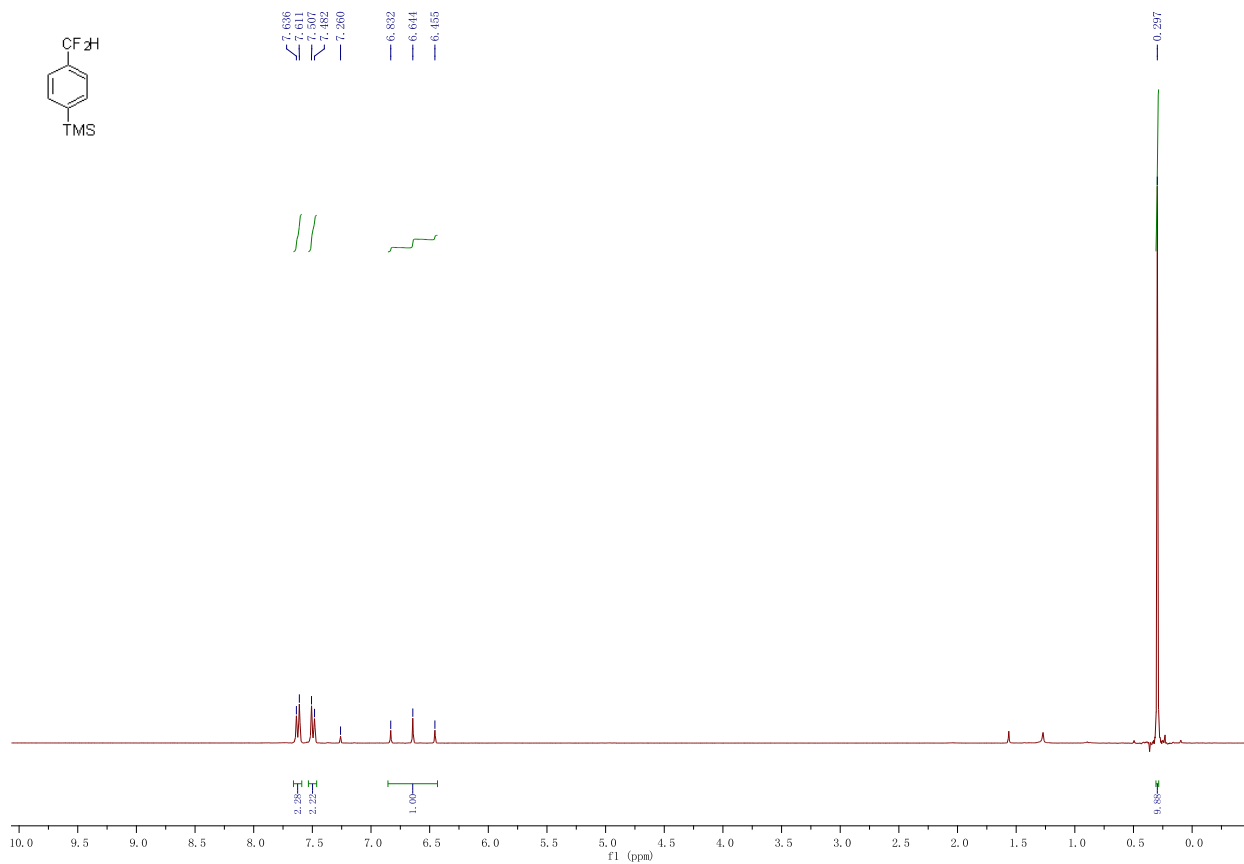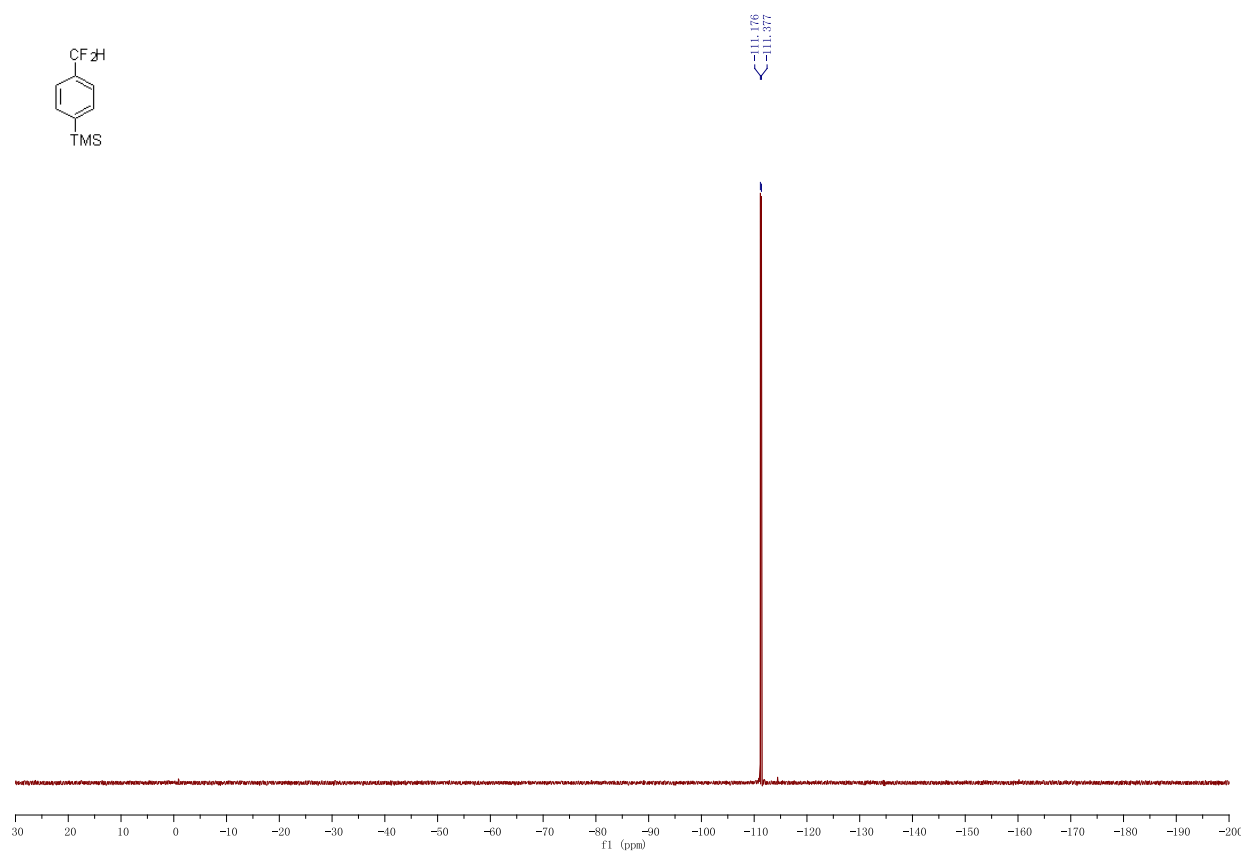

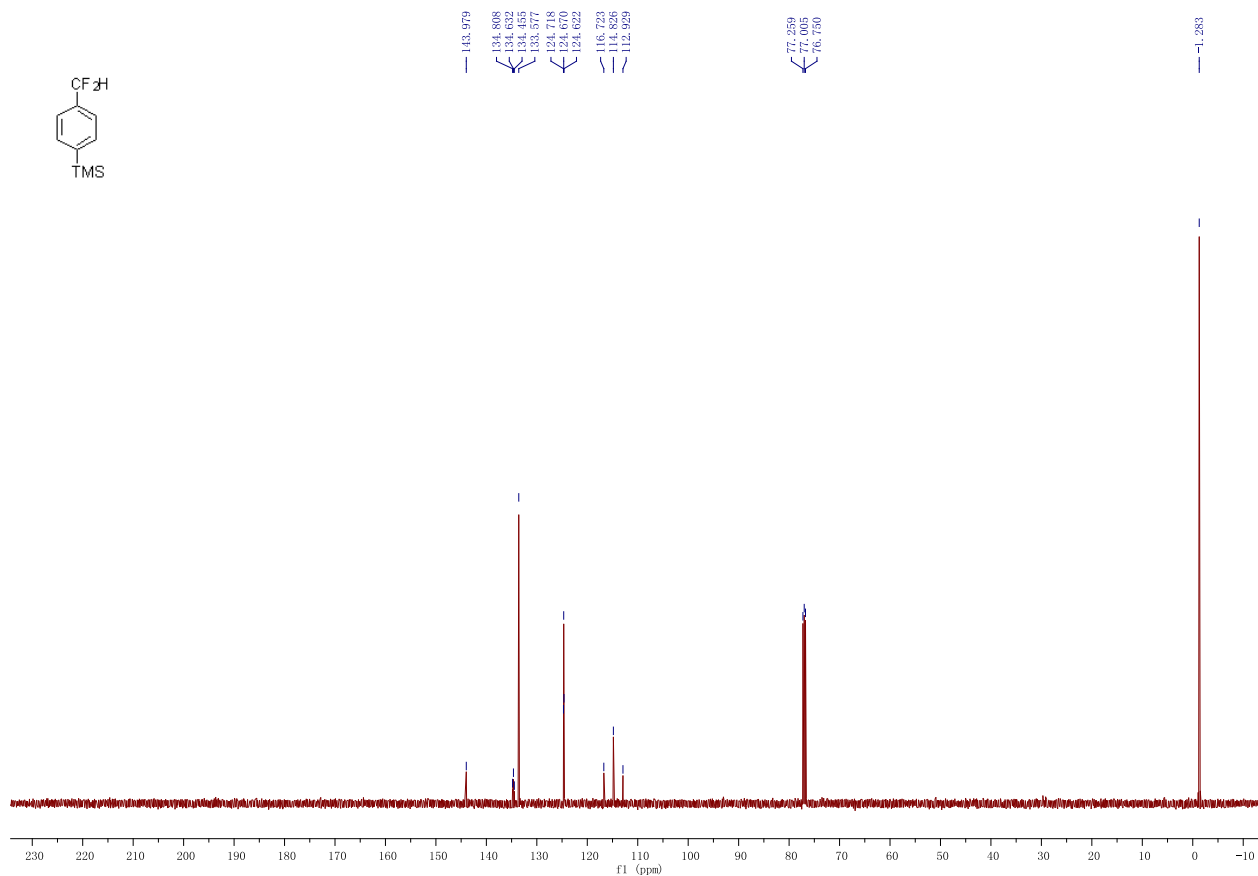

**(4-(Difluoromethyl)phenyl)(ethyl)sulfane (31).**

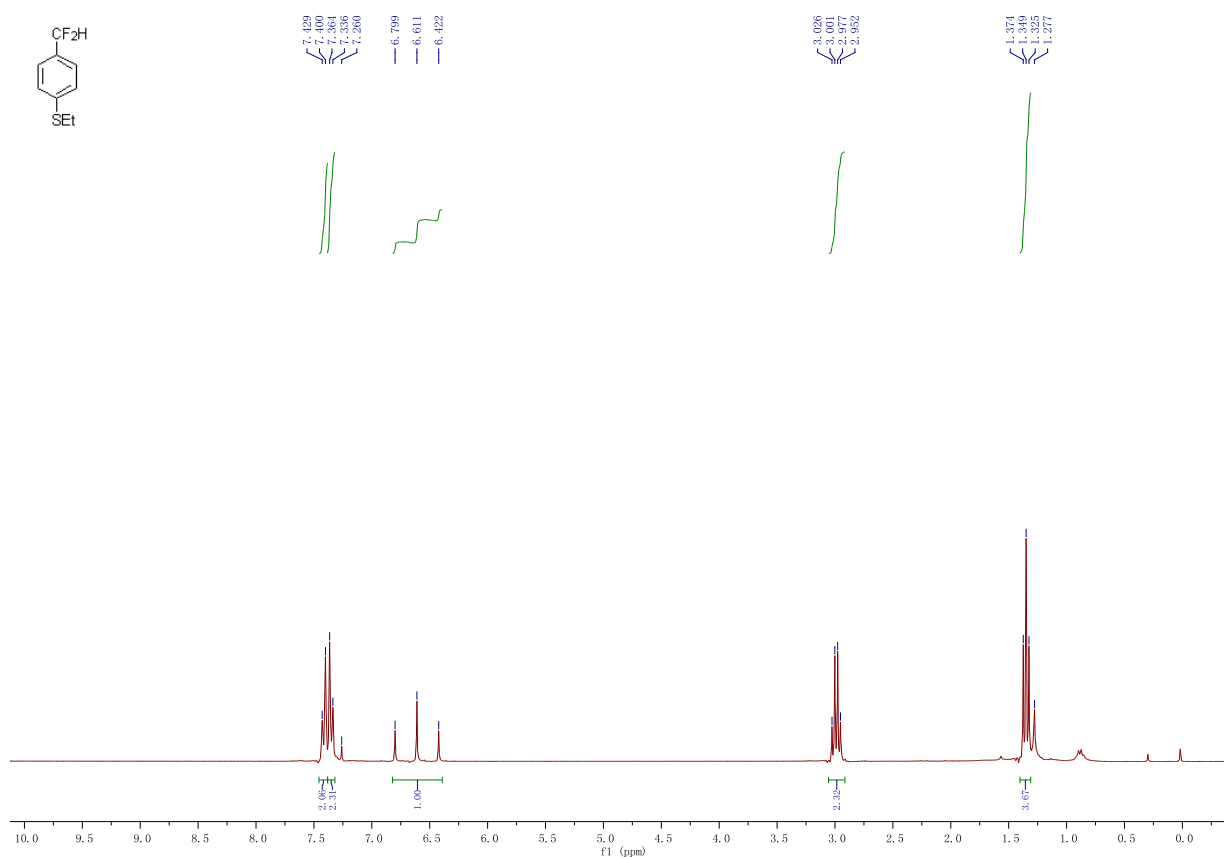



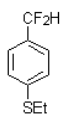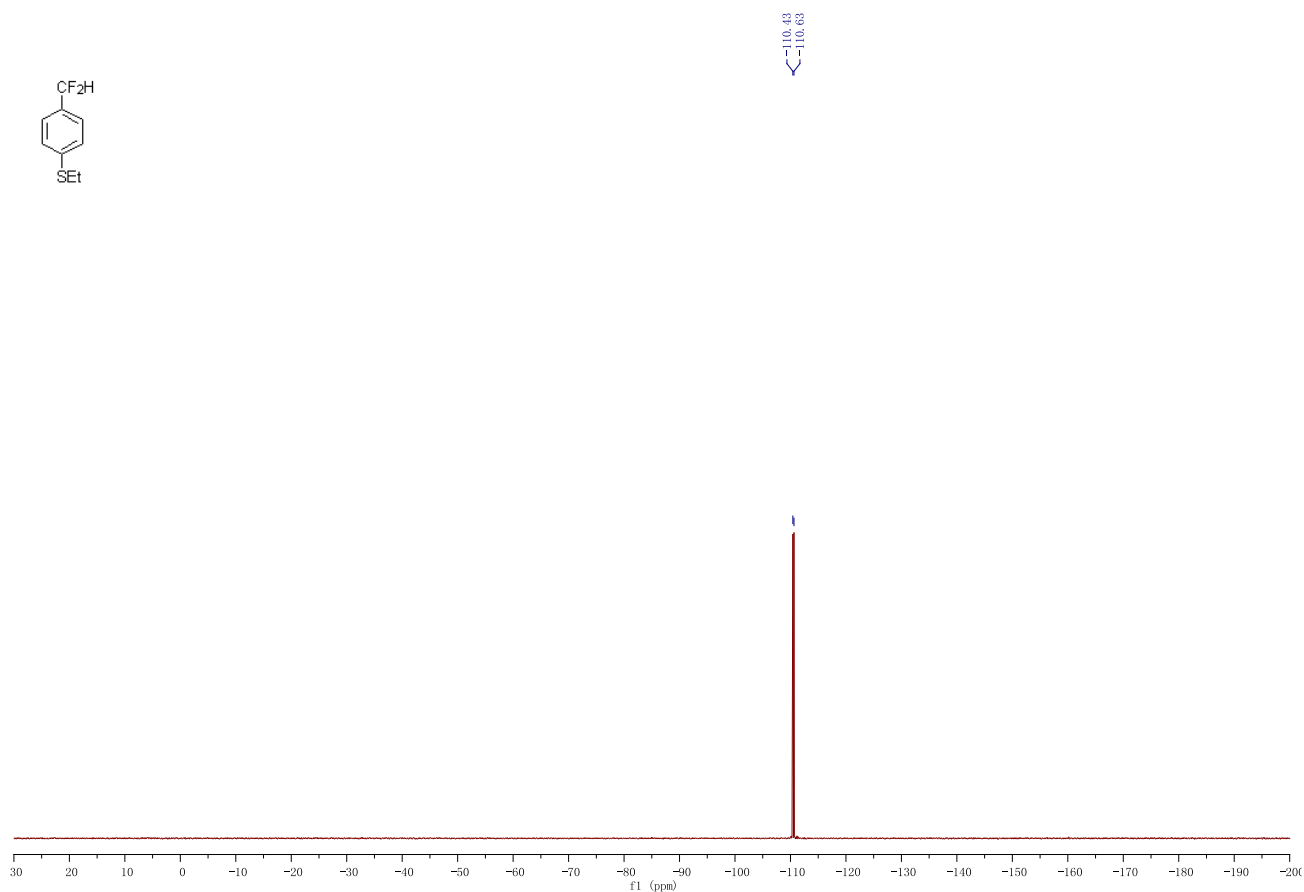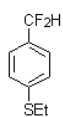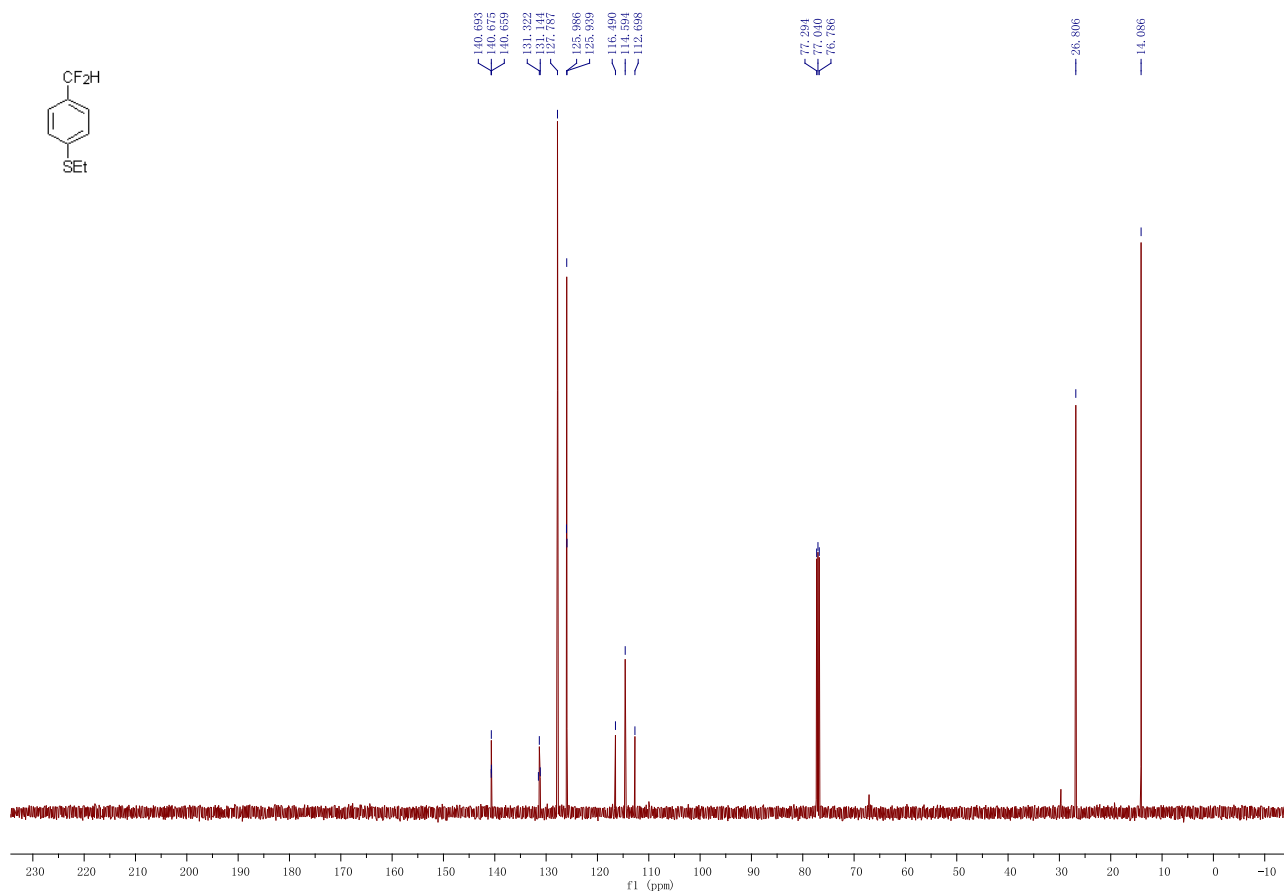

**(4-(Difluoromethyl)phenyl)methanol (32).**

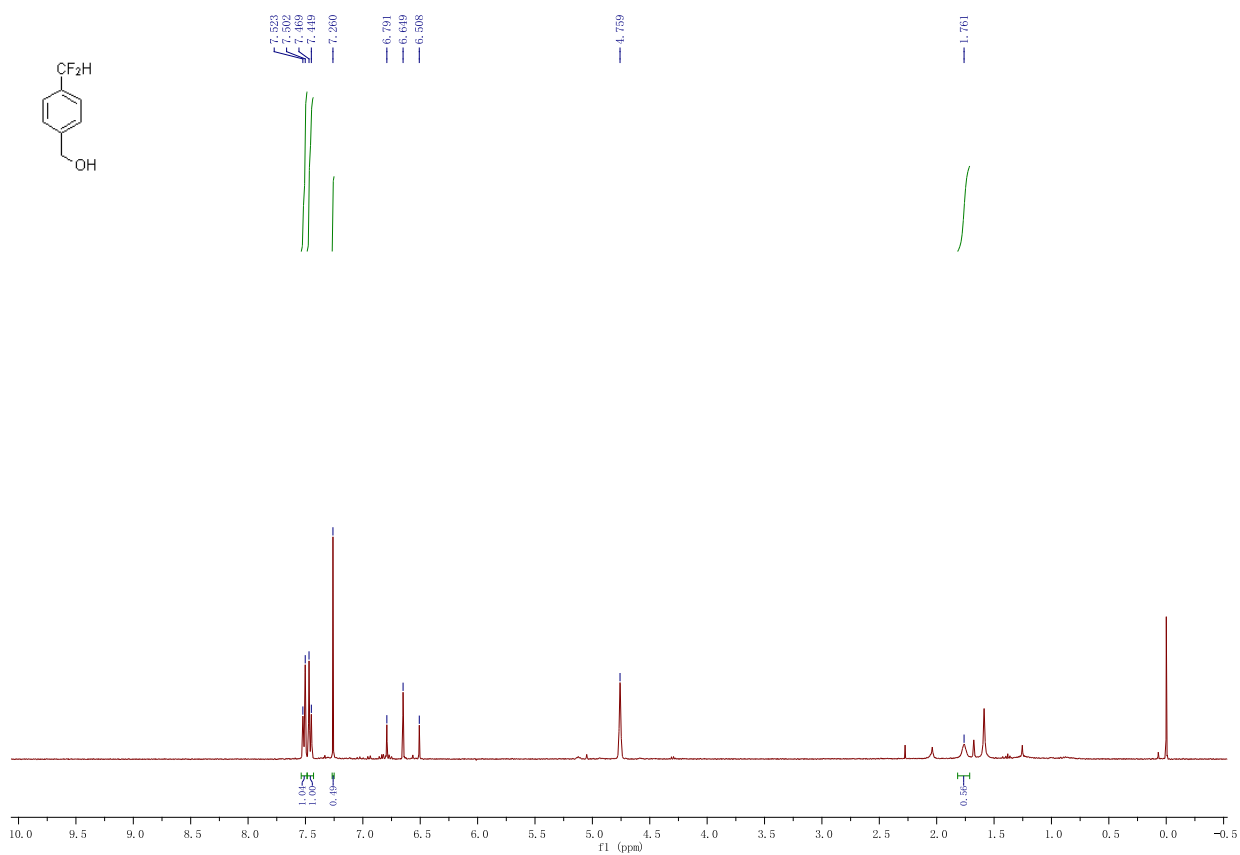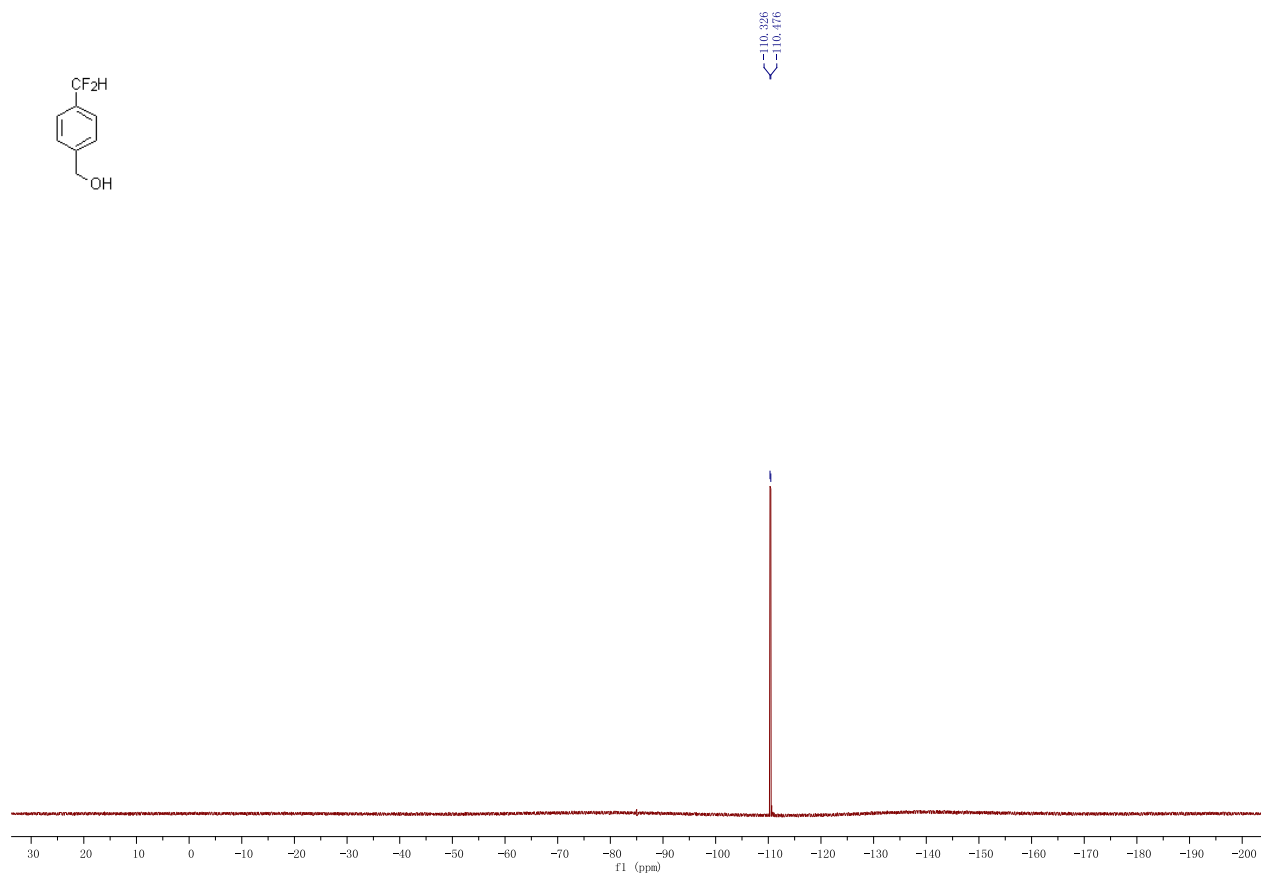

# 4-(Difluoromethyl)dibenzo[b,d]furan (33).

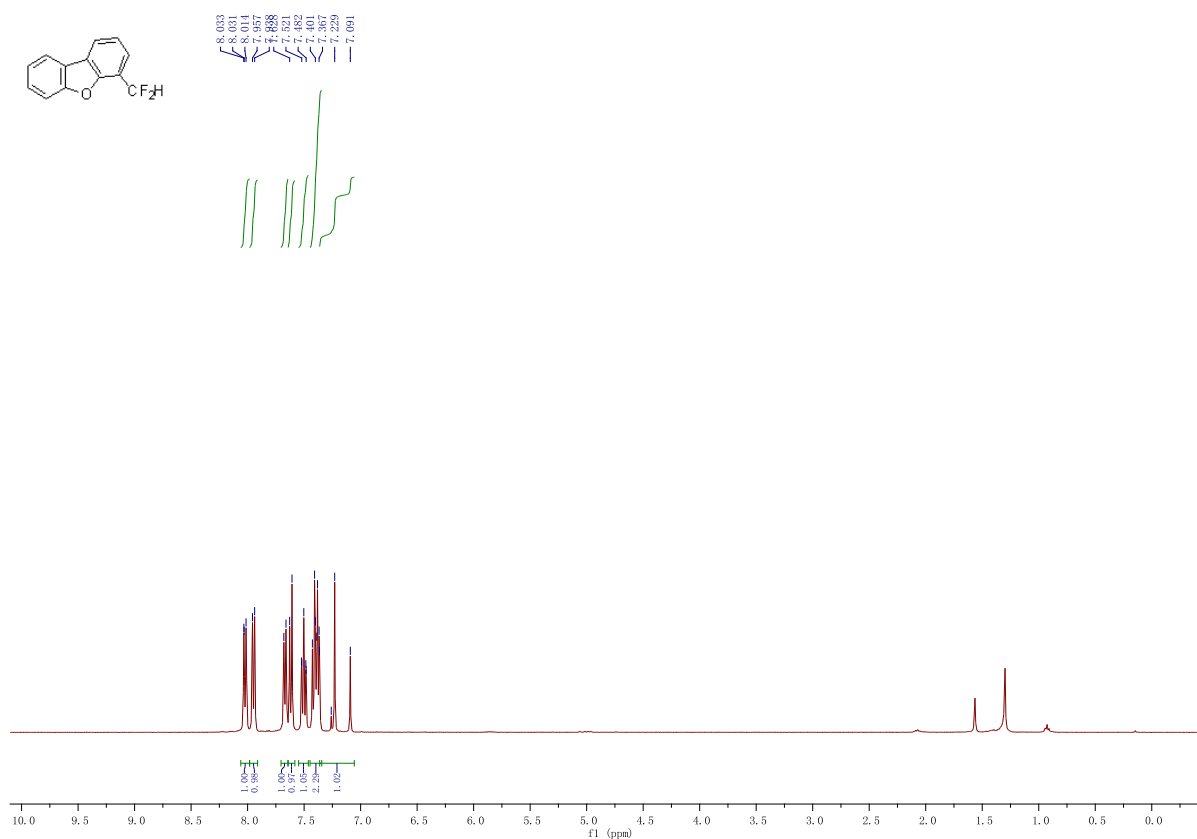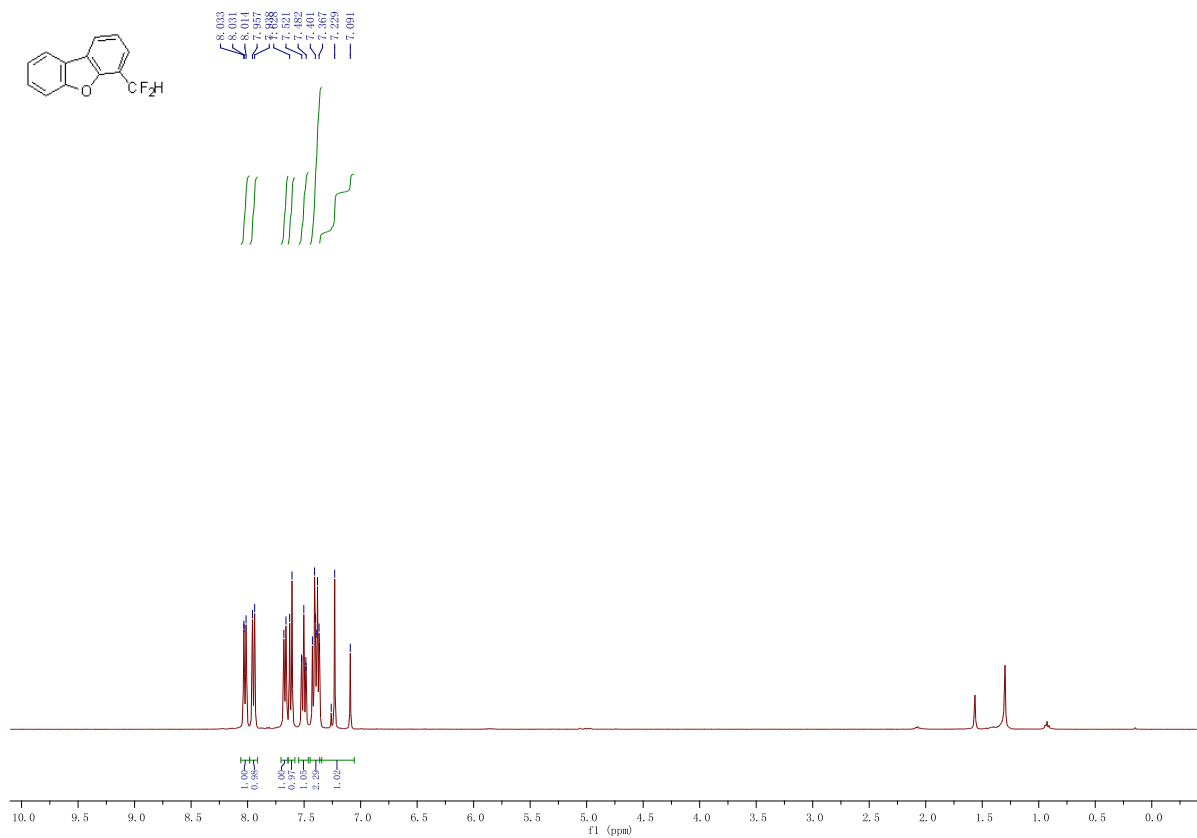

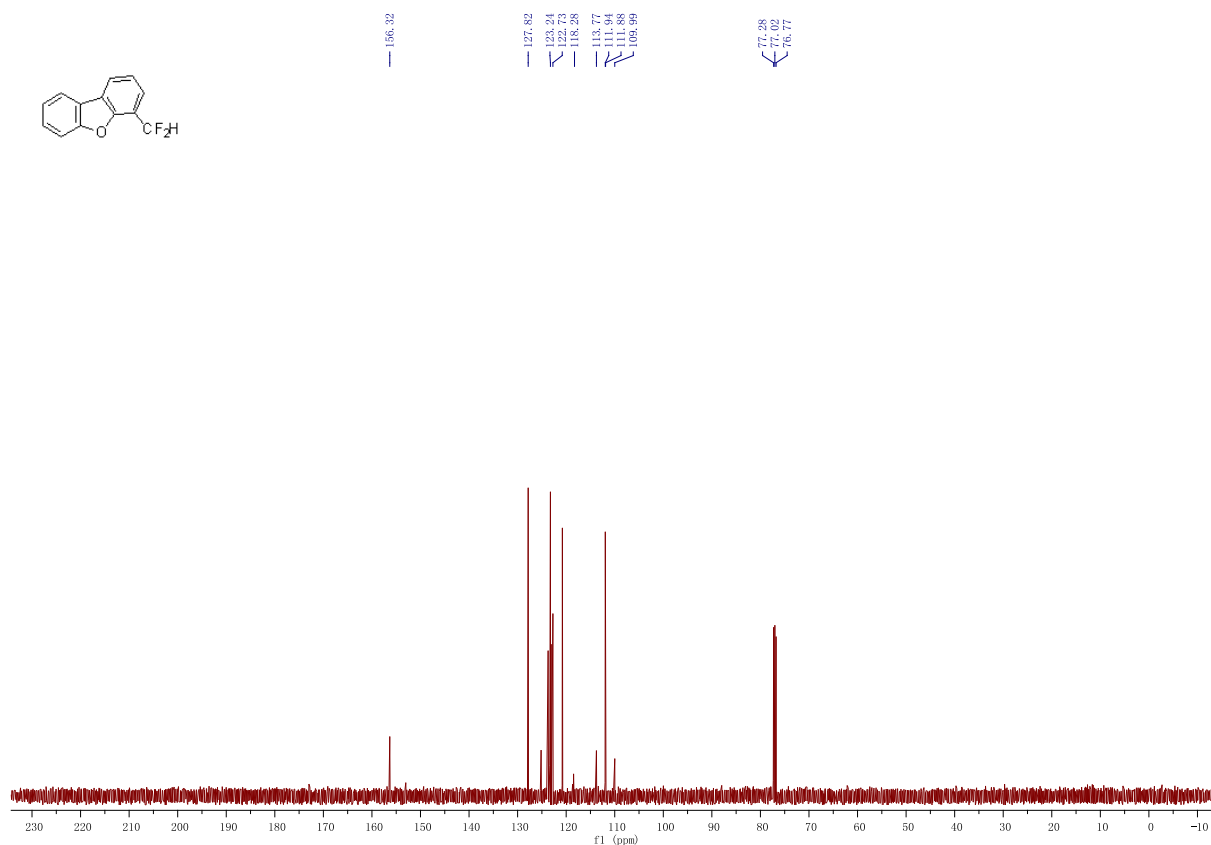

#### 4-(Difluoromethyl)dibenzo[b,d]thiophene (34).

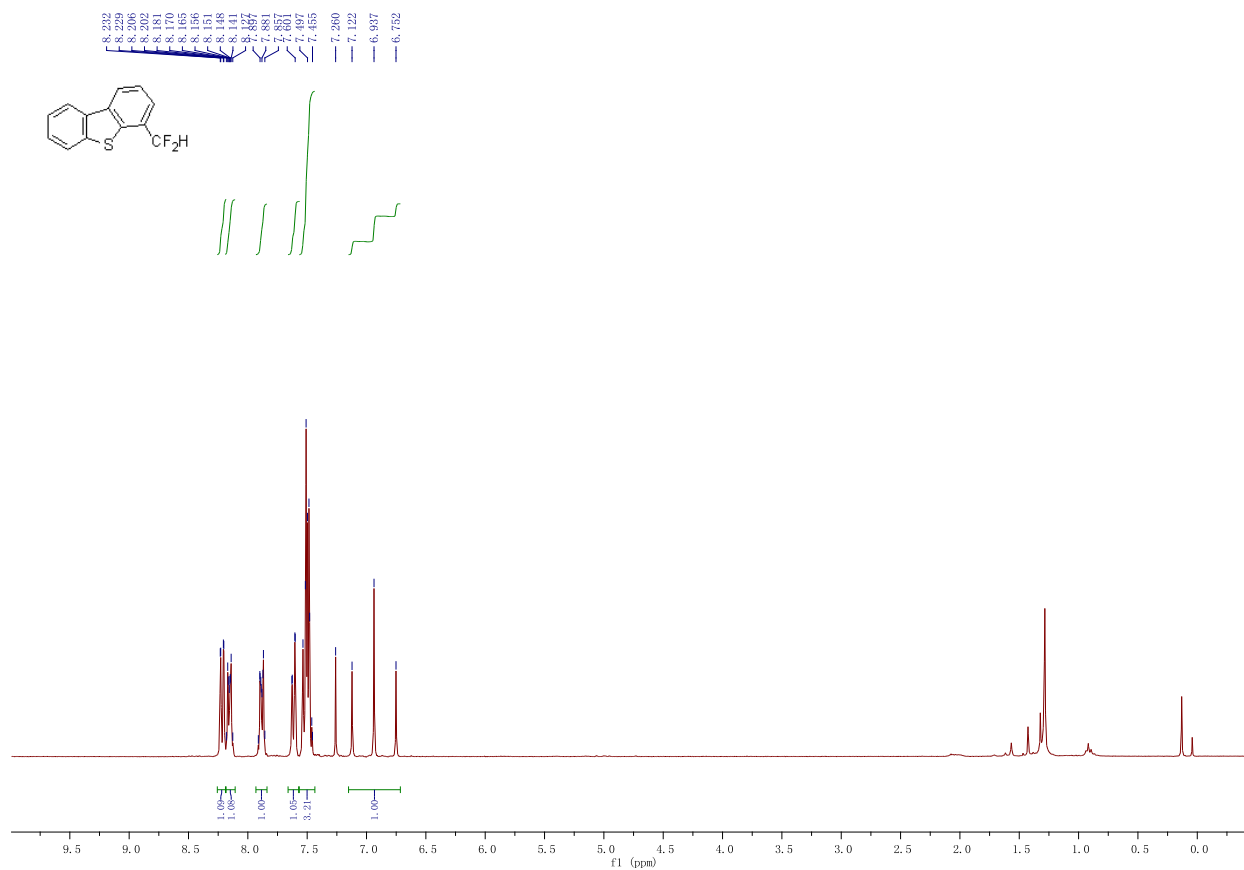

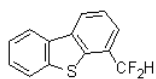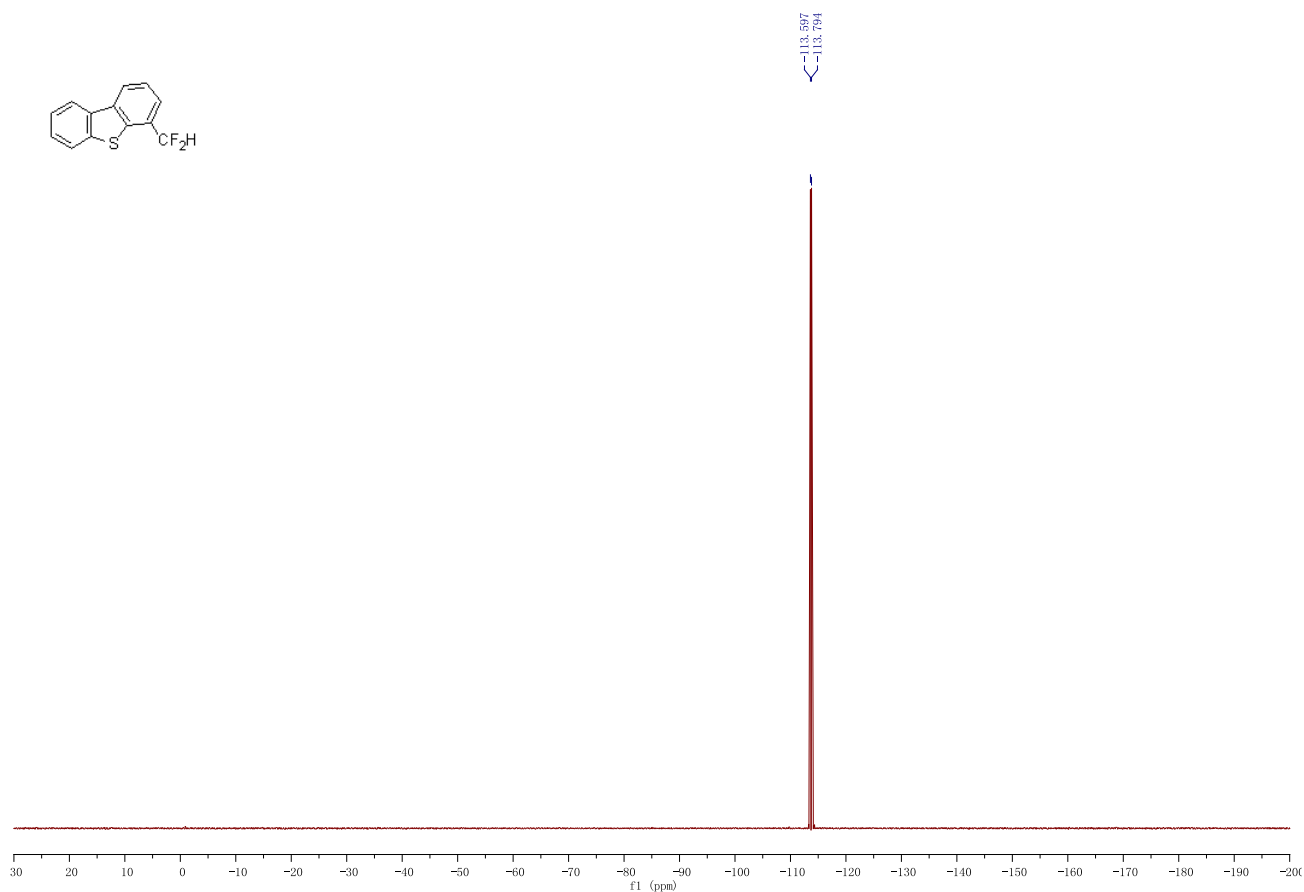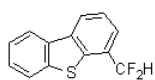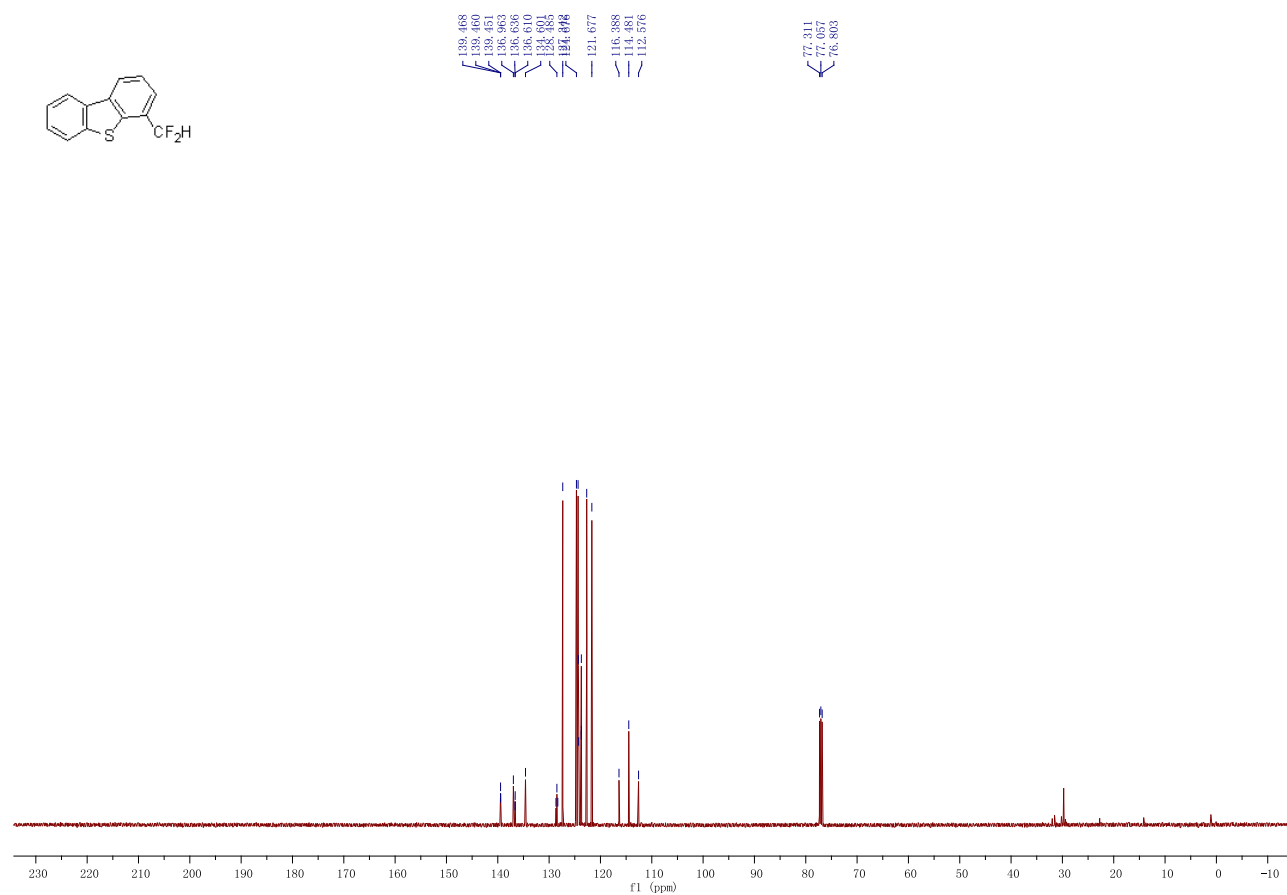

### 3-(Difluoromethyl)-9-phenyl-9H-carbazole (35).

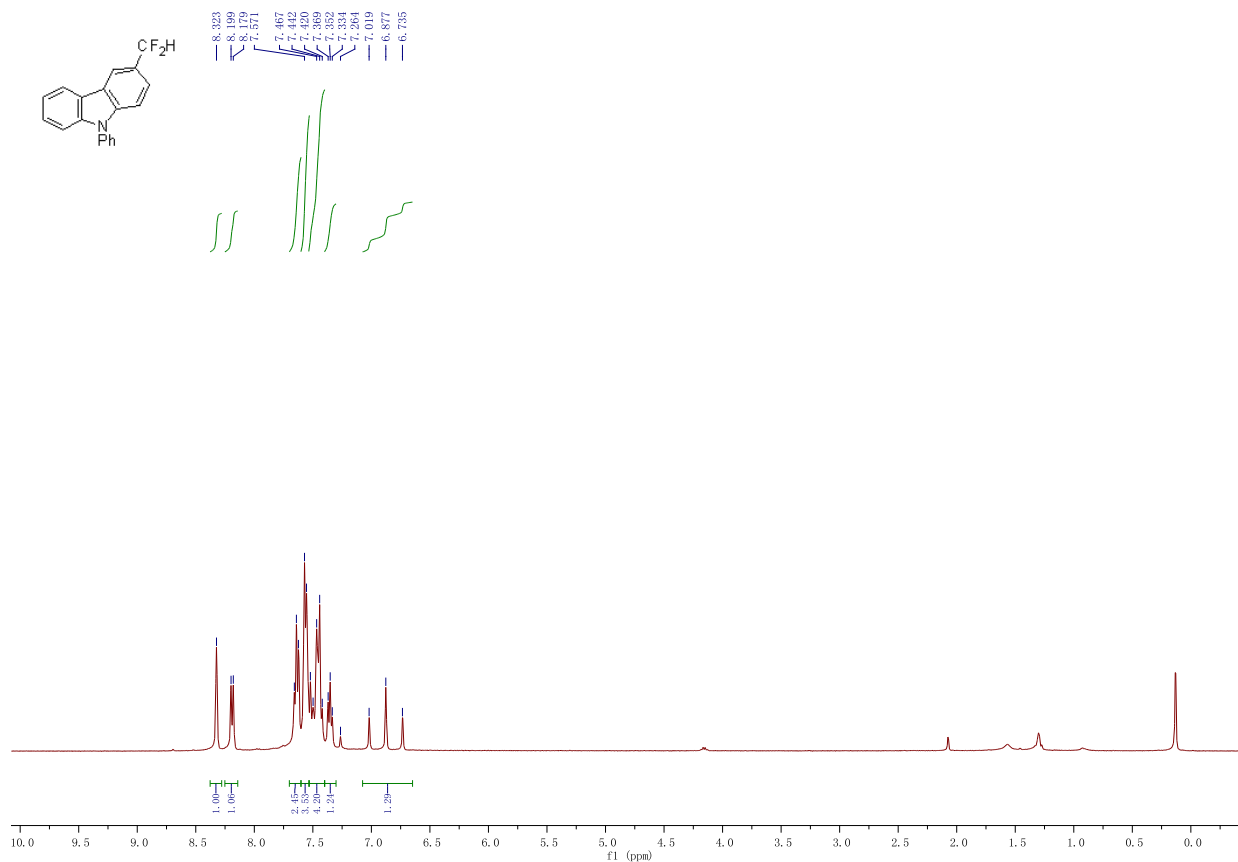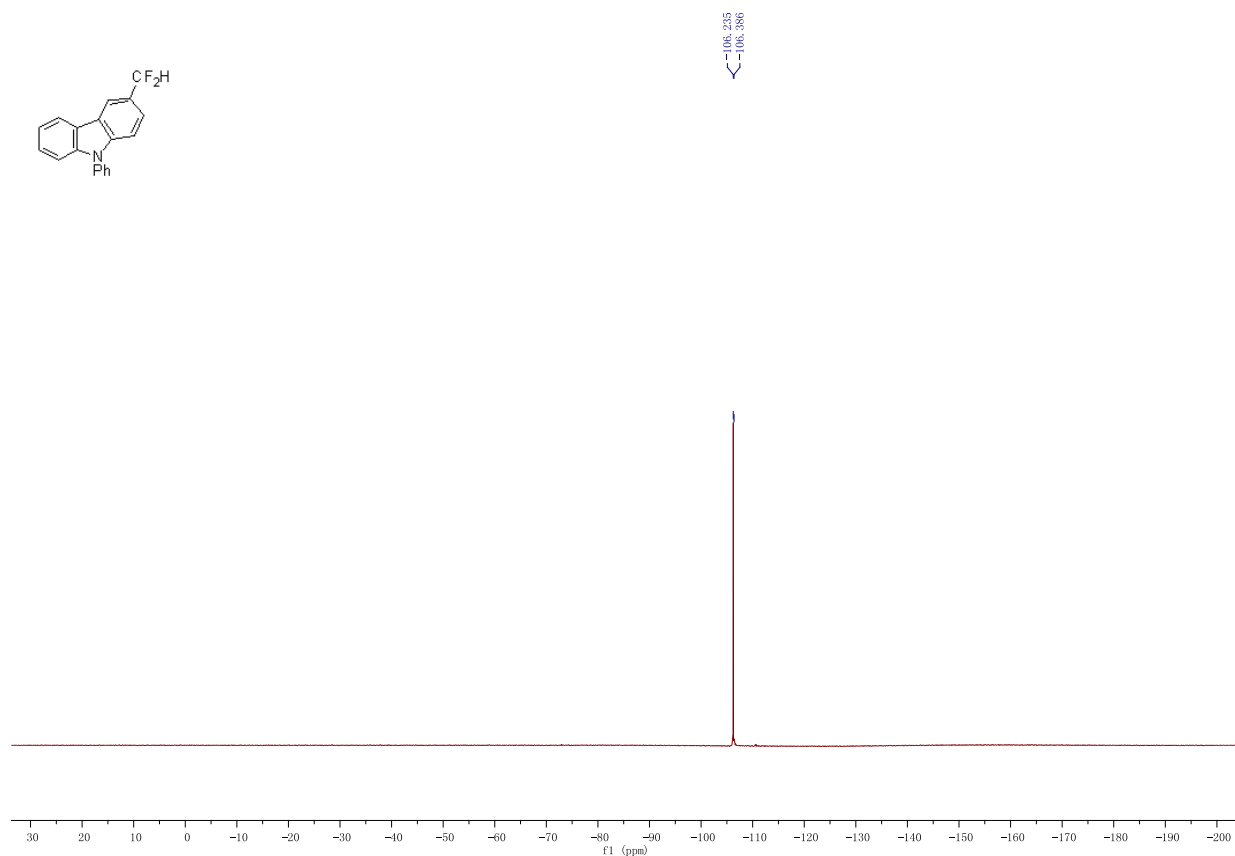

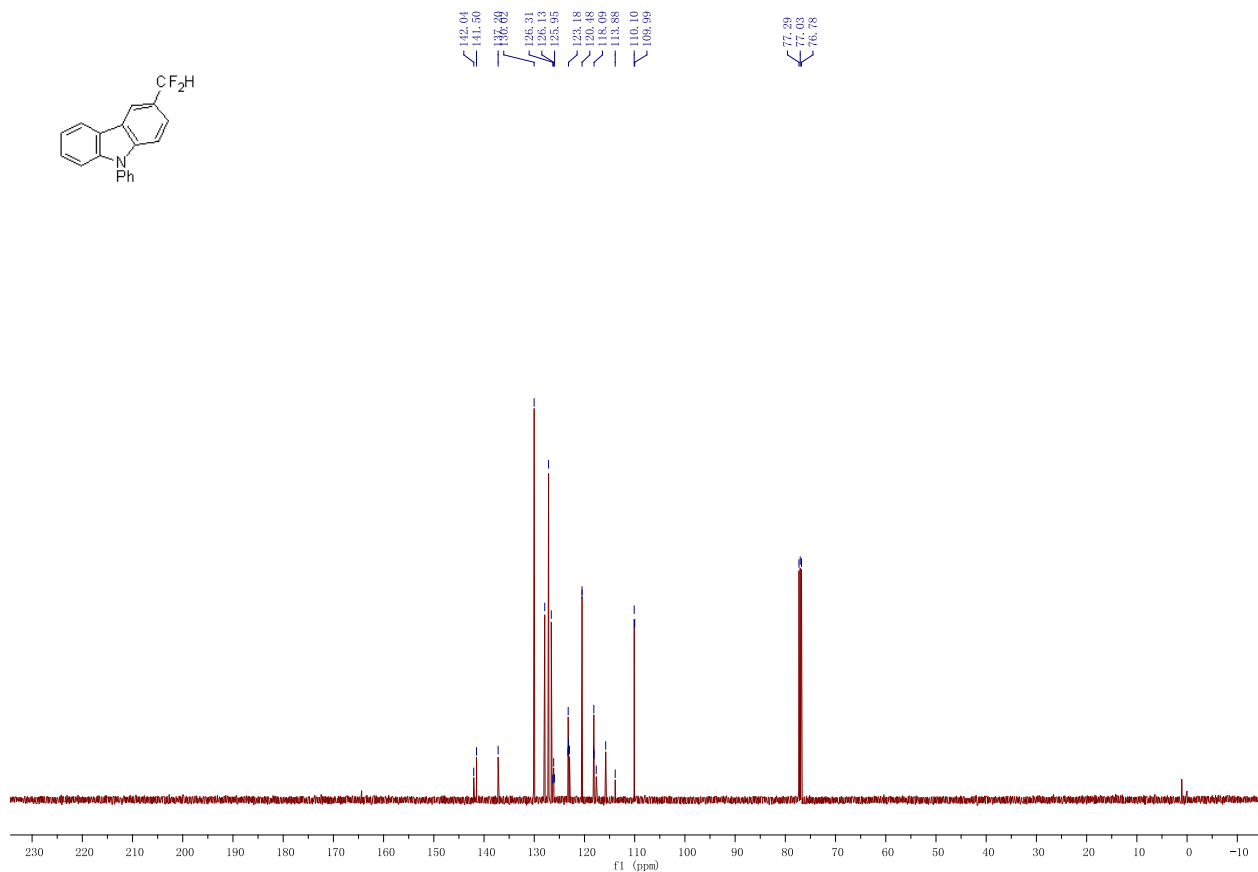

#### 4-(4-(Difluoromethyl)phenyl)morpholine (36).

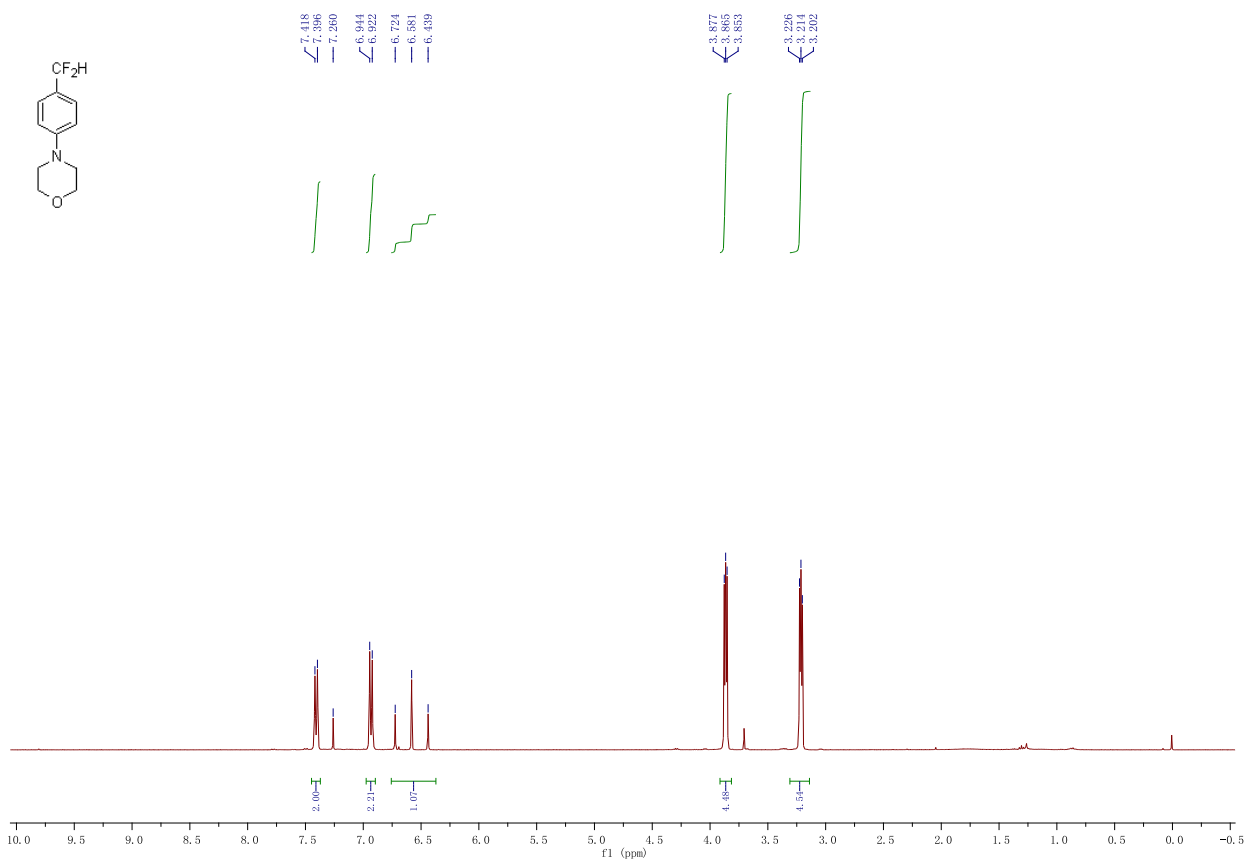

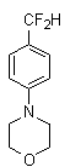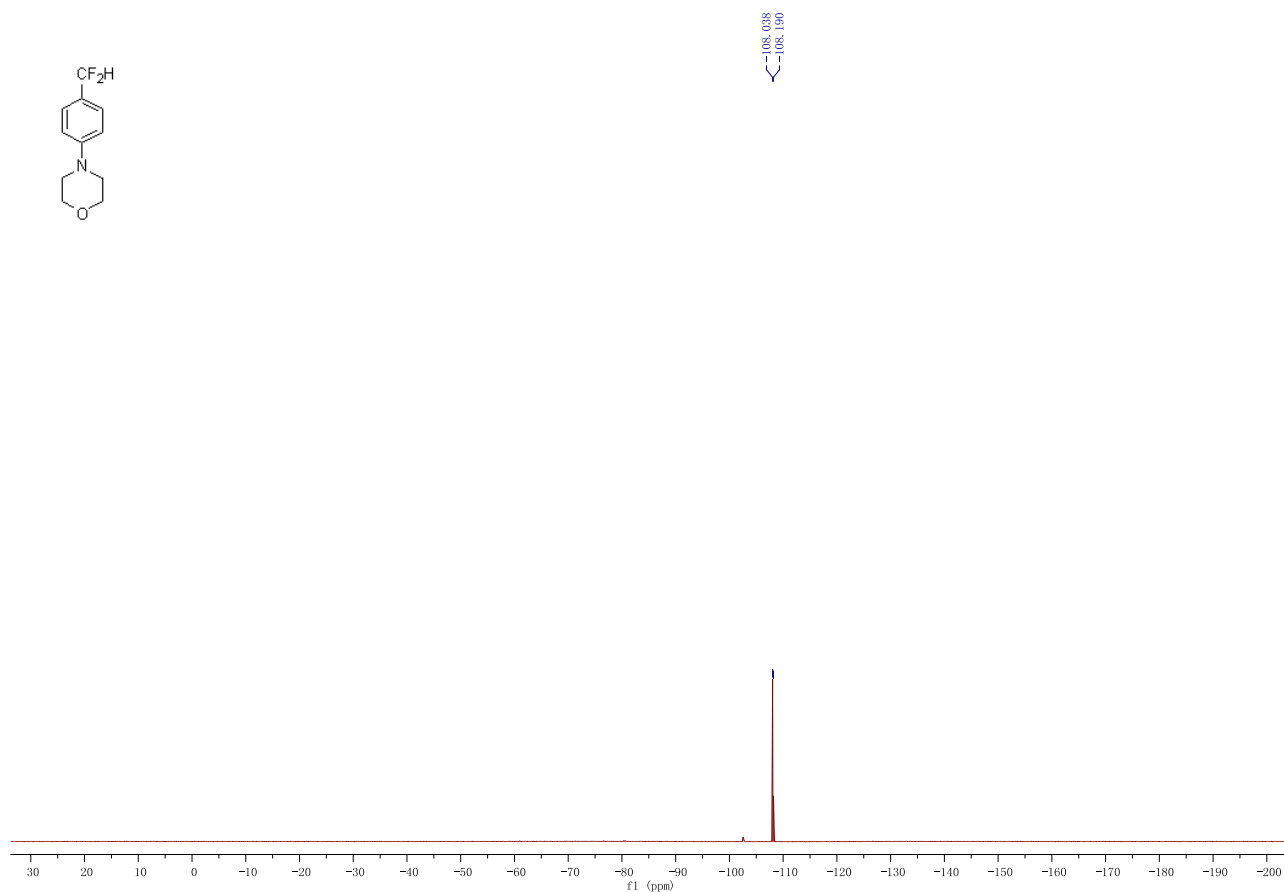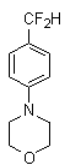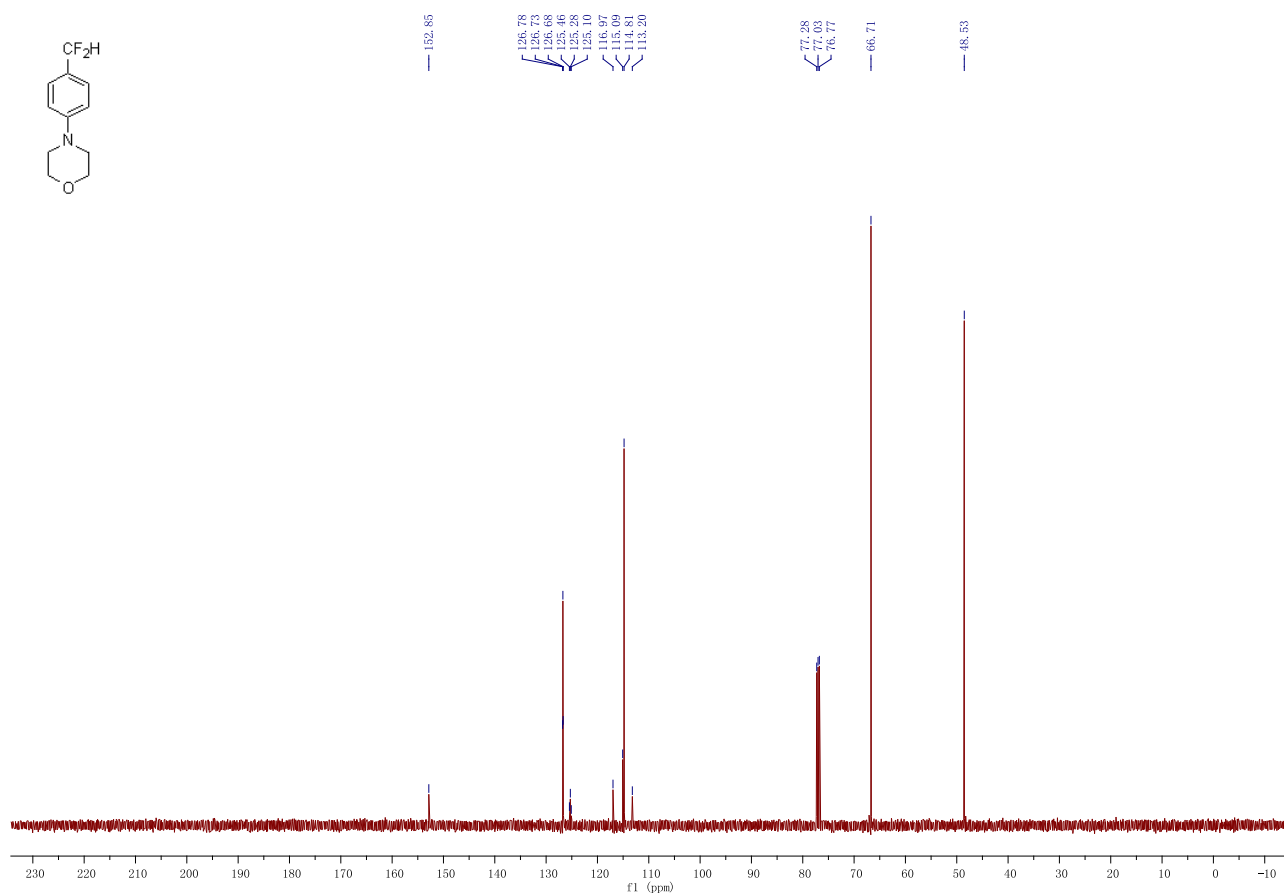



**(2-(4-(Difluoromethyl)phenyl)chroman-4-one (37).**

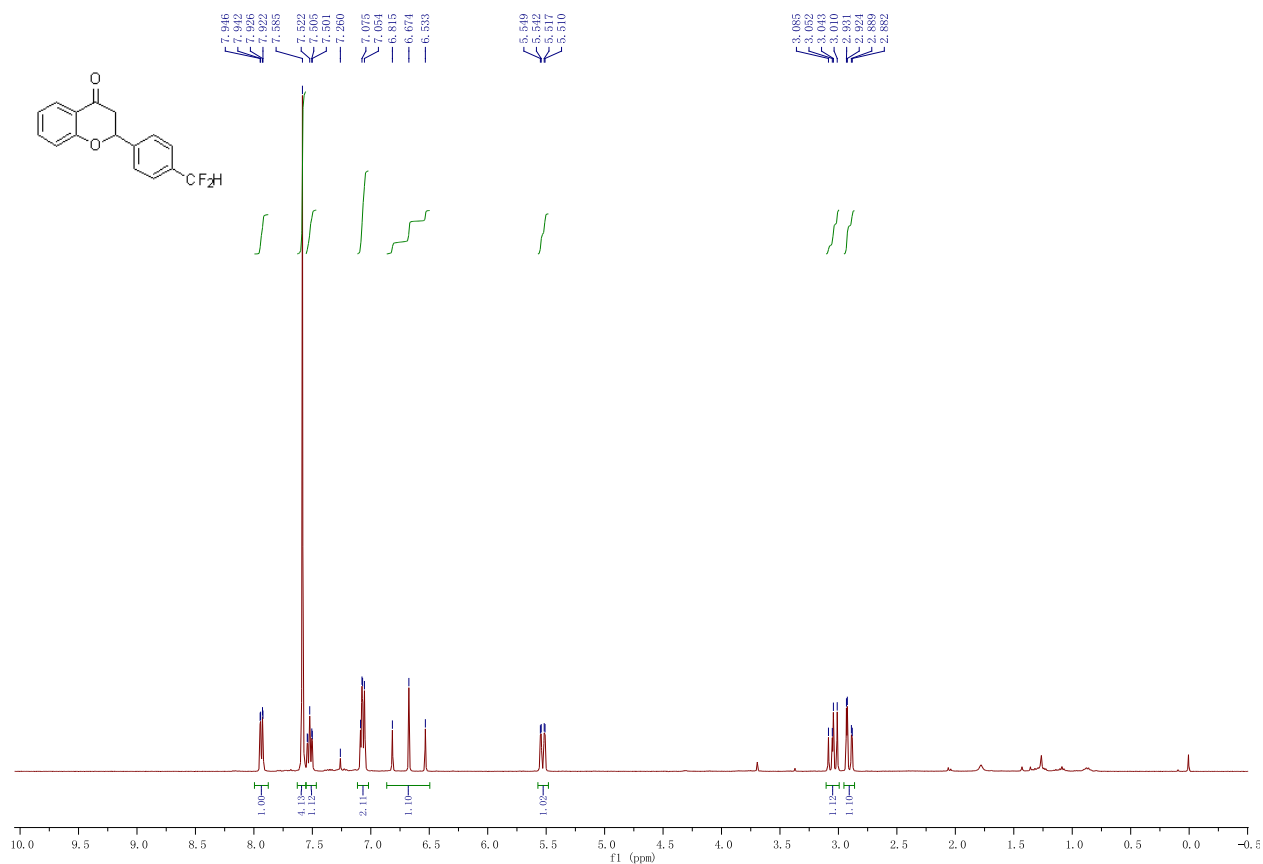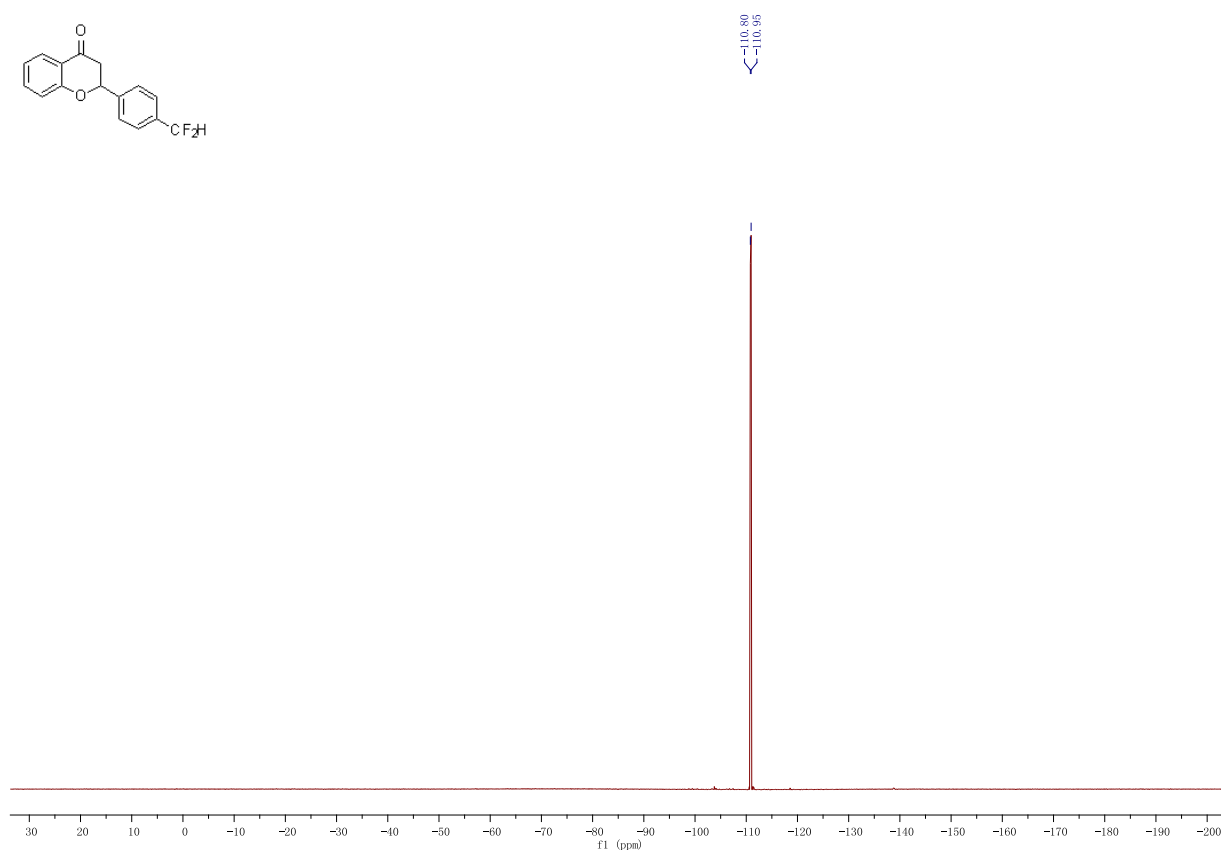

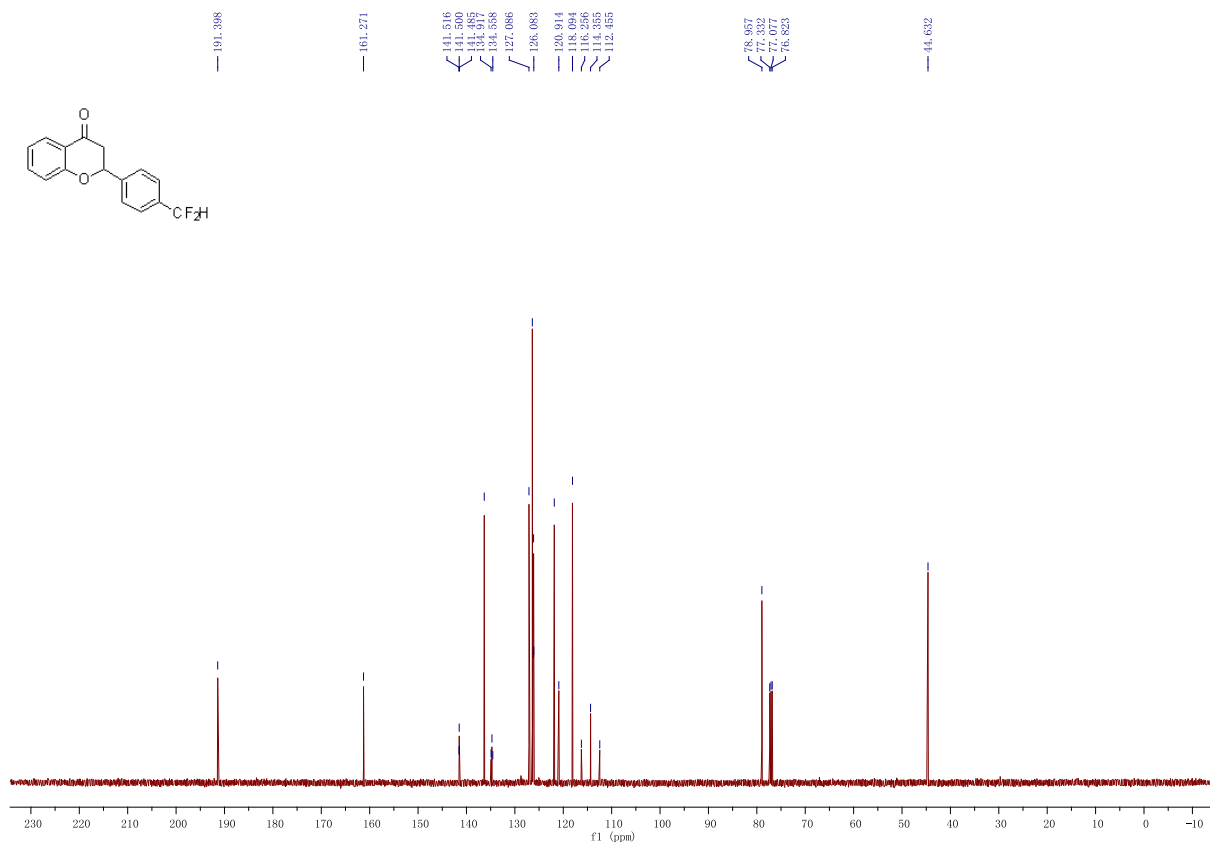

**(S)-Methyl 2-((tert-butoxycarbonyl)amino)-3-(4-(difluoromethyl)phenyl)propanoate (38).**

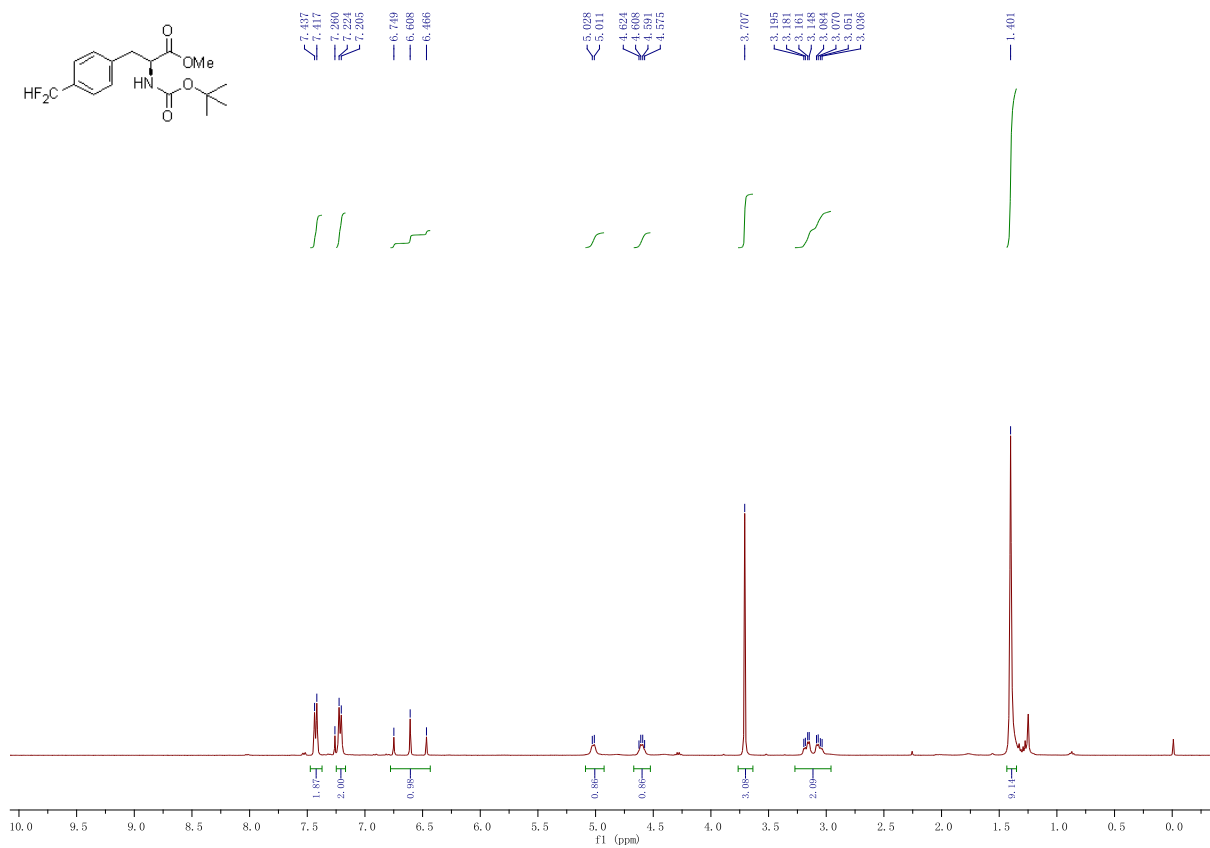

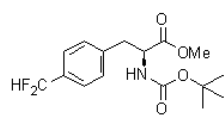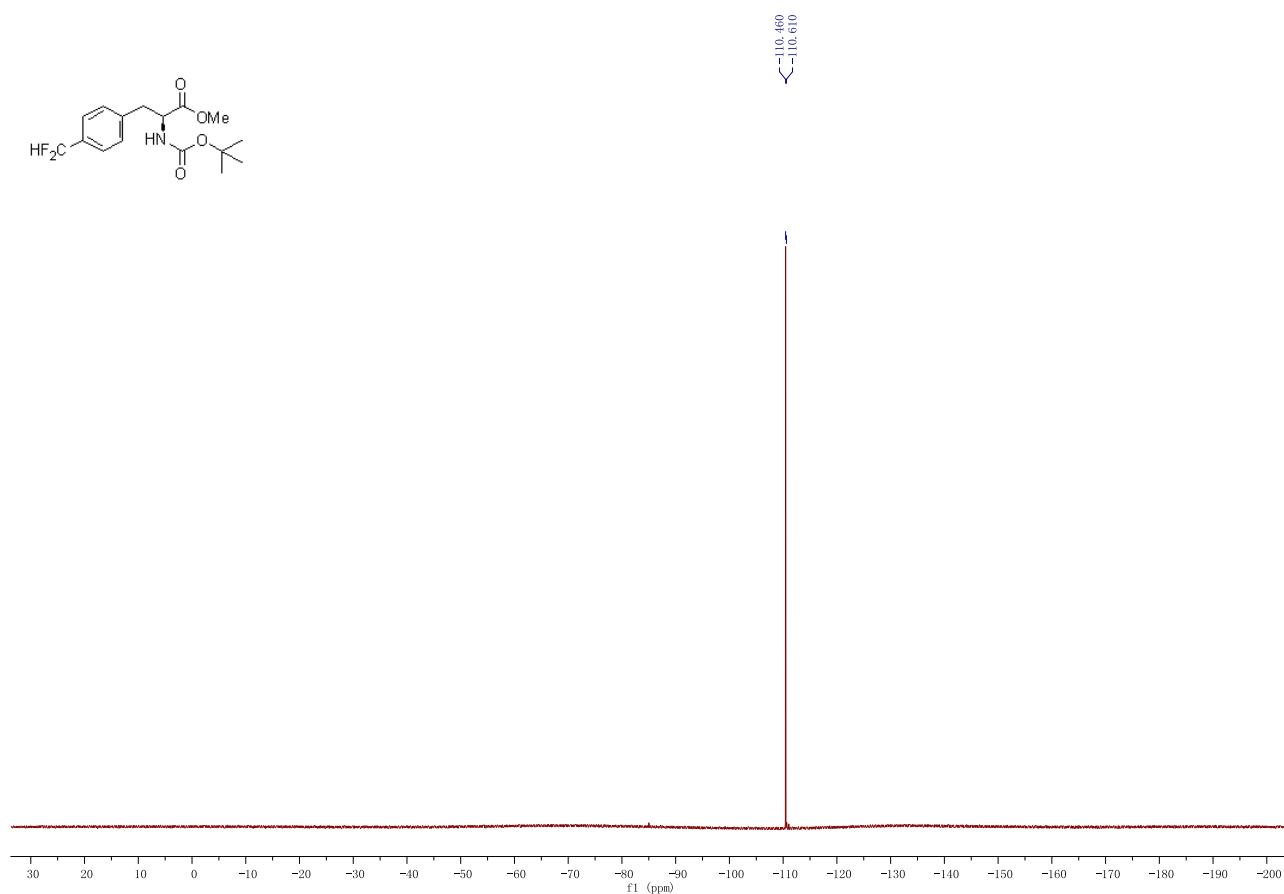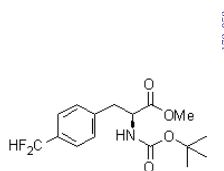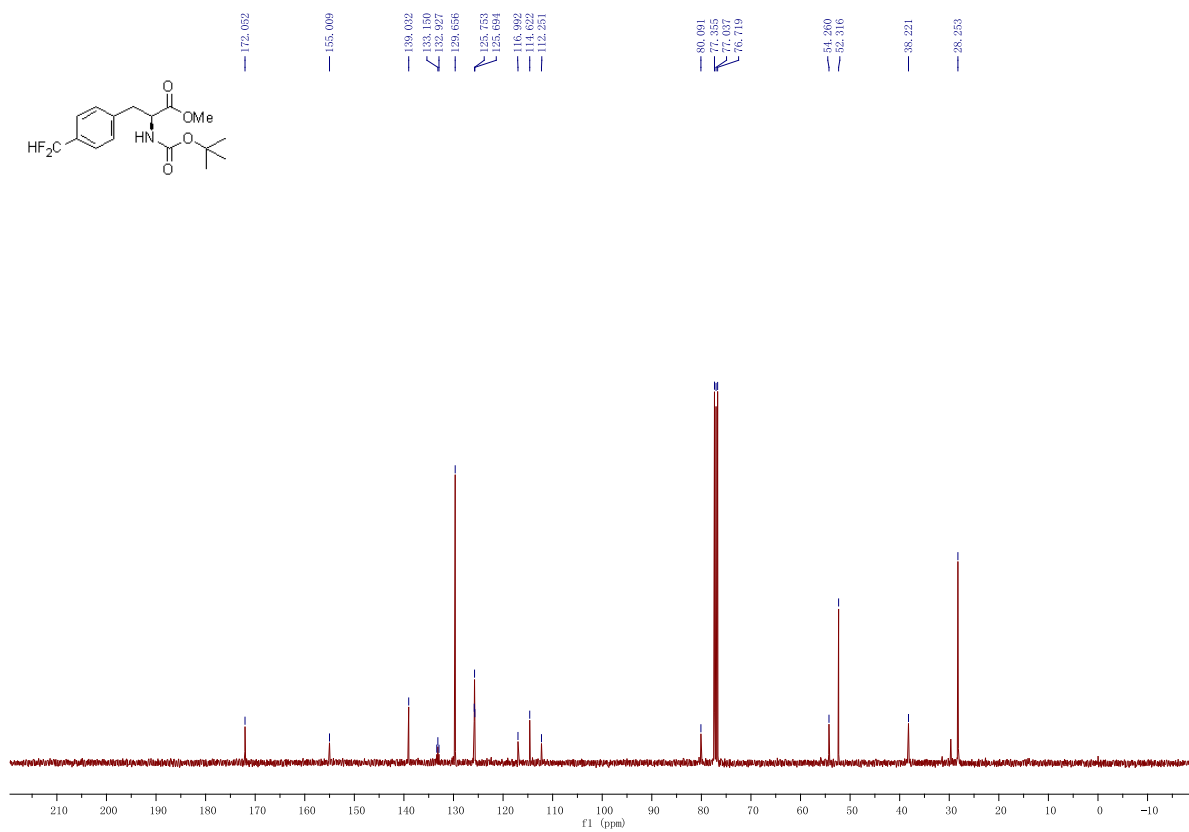

**(3R)-4-(4-(Difluoromethyl)phenyl)-1-(4-fluorophenyl)-3-((S)-3-(4-fluorophenyl)-3-hydroxypropyl)azetidin-2-one (39).**

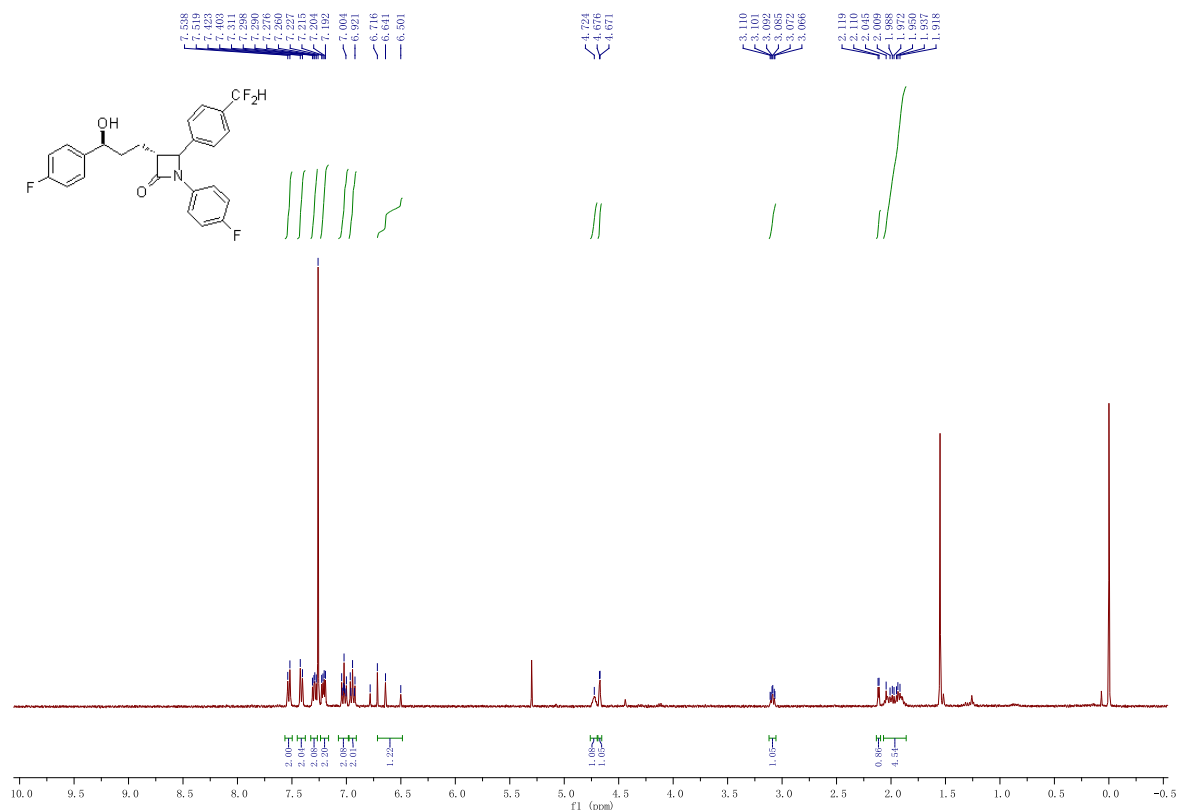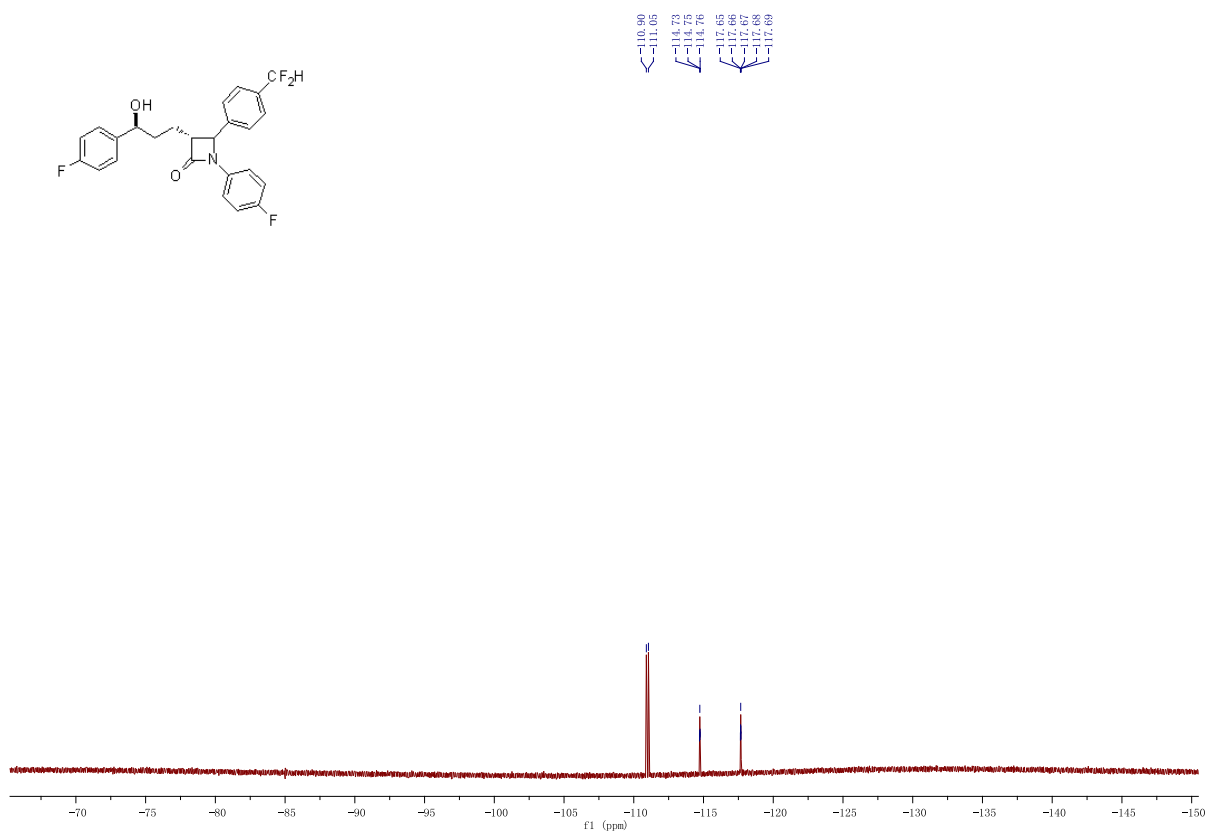

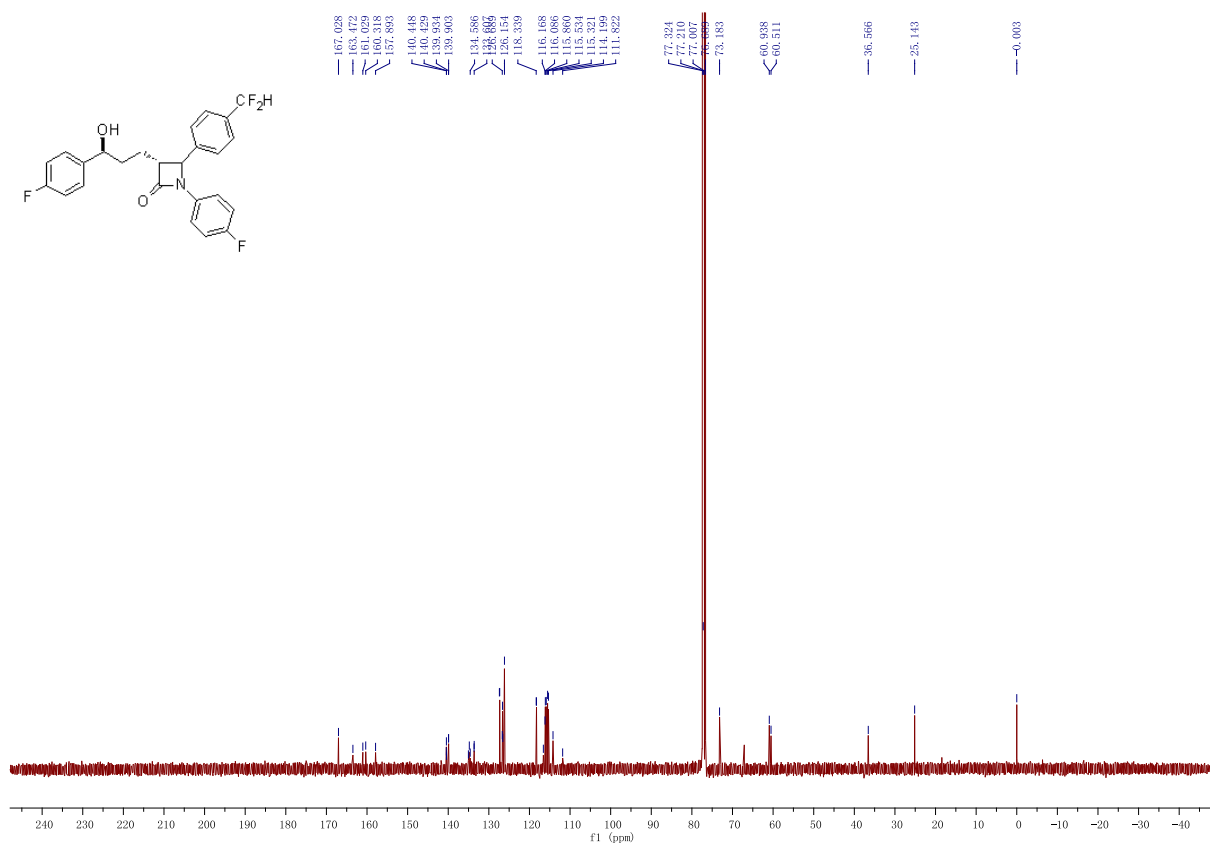

**(8R,9S,13S,14S)-3-(Difluoromethyl)-13-methyl-7,8,9,11,12,13,15,16-octahydro-6H-cyclopenta[*a*]phenanthren-17(14H)-one (40).**

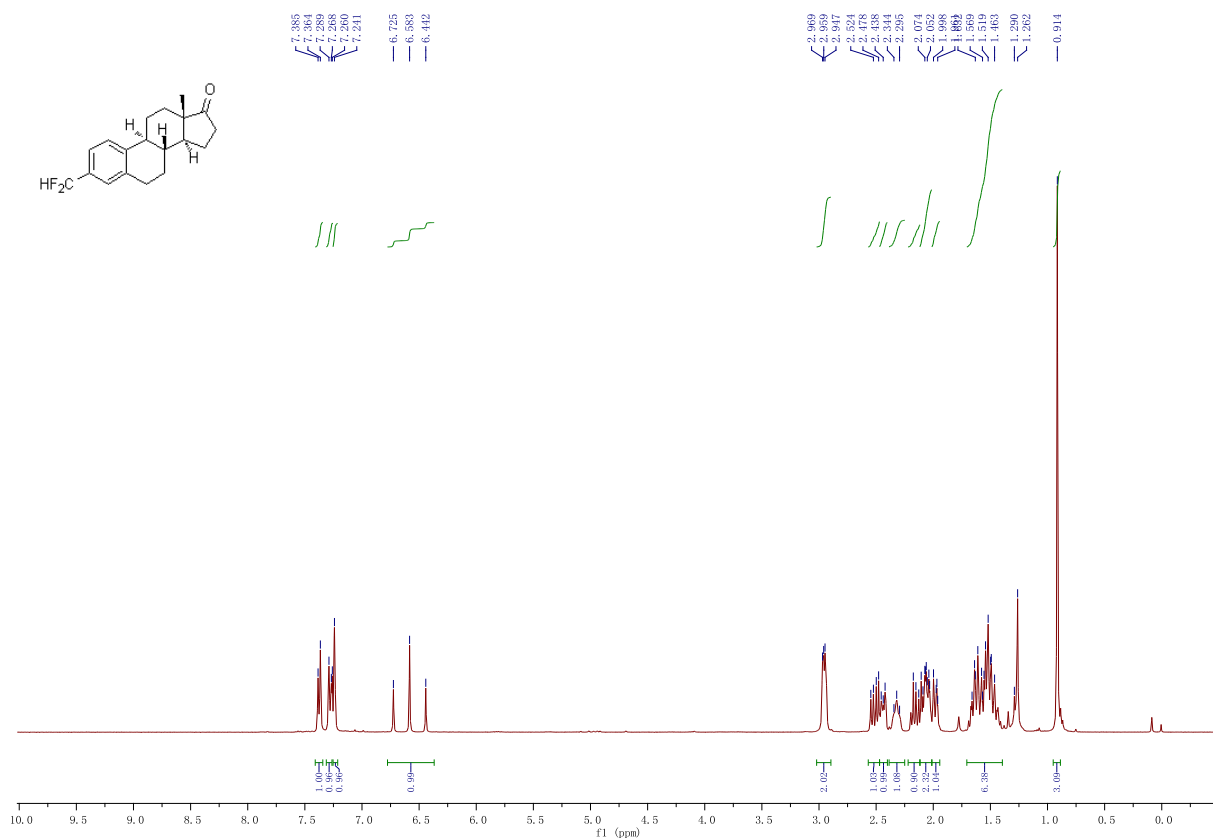

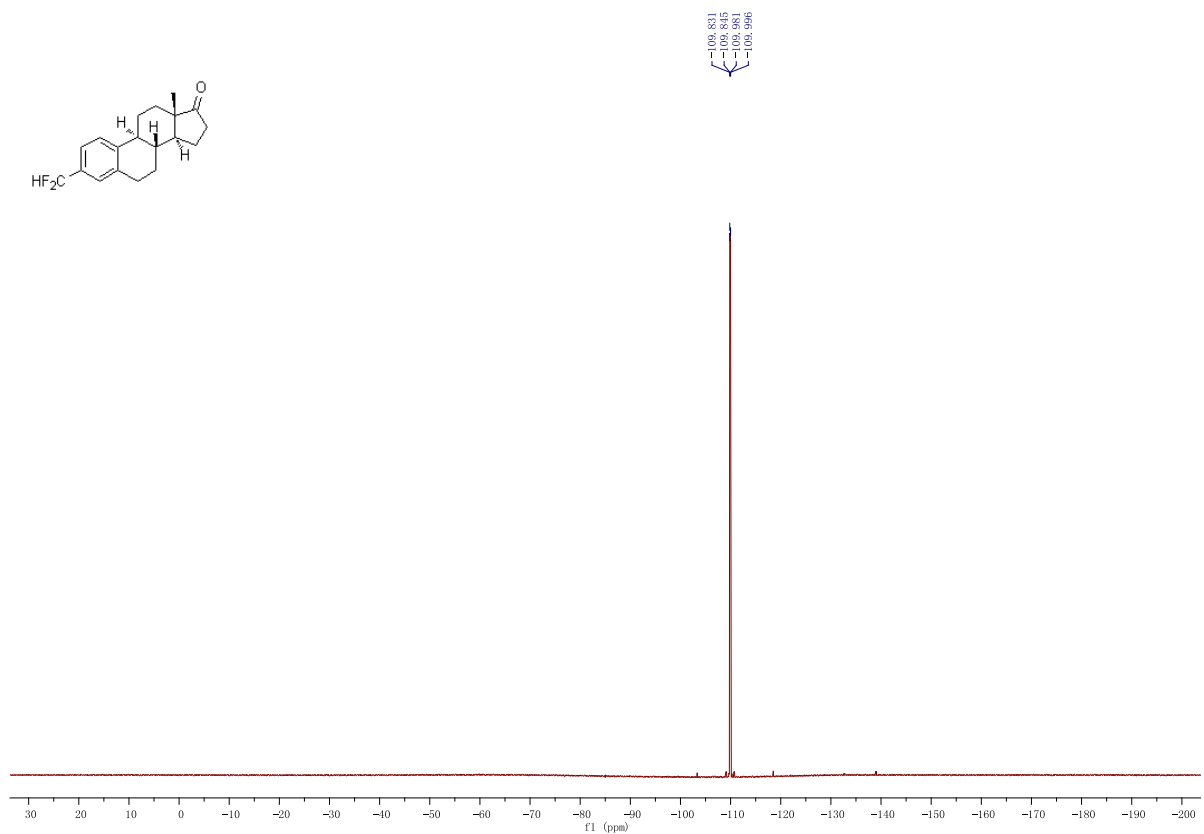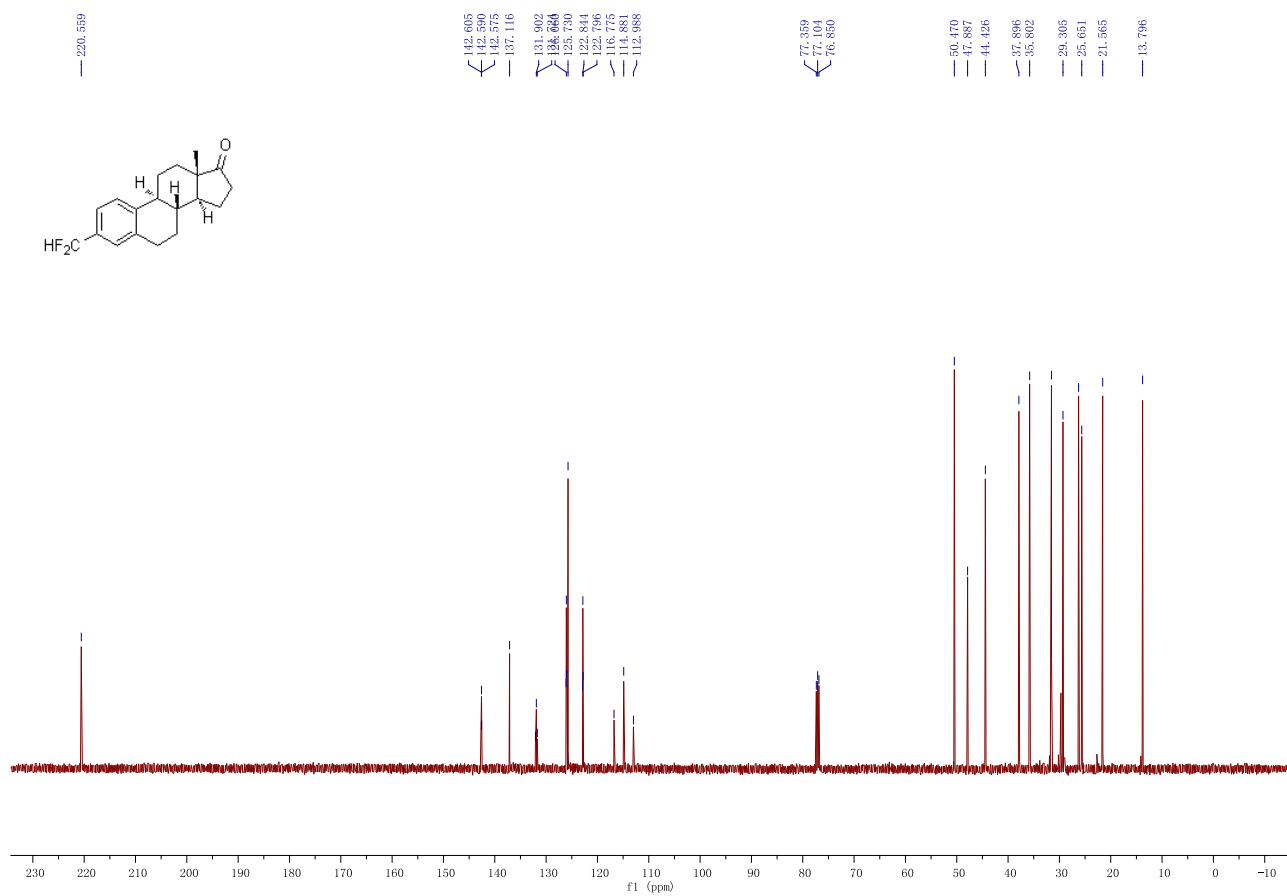

Supplement: Supplementary file 1 [file 3726097]
